# Supplementary material for: sRNA scr5239 Involved in Feedback Loop Regulation of Streptomyces coelicolor Central Metabolism
Source: Front Microbiol. 2020 Jan 23;10:3121. doi: 10.3389/fmicb.2019.03121 (PMC7025569; doi:10.3389/fmicb.2019.03121)
Supplement: TABLE S3 — Quantitative proteomics results. [file Table_3.XLSX]

## Sheet: Sheet1
Accession	Description	ΣCoverage	Σ# Proteins	Σ# Unique Peptides	Σ# Peptides	Σ# PSMs	Area	Delta1+Delta2/WT1+WT2	1+2/WT1+WT2	Delta1+Delta2/+1+2	Score A(3,6)	Coverage A(3,6)	# Peptides A(3,6)	# PSM A(3,6)	# AAs	MW [kDa]	calc. pI
21225964	oxidoreductase [Streptomyces coelicolor A3(2)]	4.04	1	1	1	4	3.10229e+07	8.71868	0.985738	8.84446	12.5032	4.04	2	4	396	41.9469	5.07178
21225714	hypothetical protein SCO7445 [Streptomyces coelicolor A3(2)]	2.45	1	1	1	4	189477894	3.39319	2.33067	1.45583	8.59388	2.45	2	4	245	26.1532	5.5542		Accession	NCBI Accession #
21223628	malate oxidoreductase [Streptomyces coelicolor A3(2)]	49.88	1	13	13	60	1.45411e+08	3.18479	0.629833	4.84607	248.065	49.88	23	60	409	42.0337	4.81787		Description	Protein description
21221809	pantothenate kinase [Streptomyces coelicolor A3(2)]	15.47	1	1	1	5	55141476	1.91251	1.25512	1.5237	0	15.47	1	5	265	28.1856	4.79248		ΣCoverage	The percent coverage calculated by dividing the number of amino acids in all found peptides by the total number of amino acids in the entire protein sequence.
21223352	phosphoenolpyruvate carboxykinase [Streptomyces coelicolor A3(2)]	1.15	1	1	1	4	1.49881e+07	1.72812	1.14507	1.50912	9.38017	1.15	2	4	609	66.8748	4.93213		Σ# Proteins	The number of identified proteins in the protein group of a master protein. Proteins are grouped based on sequence homology and/or isoforms as explained below.
21218687	beta keto-acyl synthase [Streptomyces coelicolor A3(2)]	2.37	1	1	1	3	2.44878e+07	1.62806	1.2912	1.57329	0	2.37	2	3	2240	235.847	6.18896		Σ# Unique Peptides	The number of peptide sequences unique to a protein group.
21222104	regulatory protein [Streptomyces coelicolor A3(2)]	13.27	1	1	1	1	111155936	1.62043	2.17826	0.743878	0	13.27	1	1	422	45.22	5.23682		Σ# Peptides	The number of distinct peptide sequences in the protein group.
21219294	hypothetical protein SCO0771 [Streptomyces coelicolor A3(2)]	16.55	1	2	2	6	1.79451e+07	1.61816	1.07851	1.27867	17.6076	16.55	4	6	145	17.1775	5.69385		Σ# PSMs	The total number of identified peptide sequences (peptide spectrum matches) for the protein, including those redundantly identified.
21218757	hypothetical protein SCO0201 [Streptomyces coelicolor A3(2)]	12.11	1	2	2	10	1.1004e+08	1.52571	1.42181	0.976913	24.5459	12.11	4	10	223	23.3439	8.63135		Area	Area under the peak
21225918	hypothetical protein SCO7657 [Streptomyces coelicolor A3(2)]	6.5	1	3	3	18	1.07518e+07	1.52437	1.44976	1.25686	62.23	6.5	6	18	585	61.6884	8.77783		Delta1+Delta2/WT1+WT2	fold change of protein amount in delta scr5239 vs. Wt
21218767	nitrate/nitrite transporter [Streptomyces coelicolor A3(2)]	3.16	1	1	1	2	0	1.44086	1.31982	1.09166	8.53719	3.16	2	2	412	41.6053	10.0962		1+2/WT1+WT2	fold change of protein amount in scr5239+ vs. delta scr5239
21219512	methyltransferase [Streptomyces coelicolor A3(2)]	19.68	1	3	3	16	6.22669e+07	1.43794	1.38747	1.04153	68.026	19.68	6	16	249	27.727	5.03369		Delta1+Delta2/+1+2	fold change of protein amount in delta scr5239 vs. Scr5239+
21221329	hypothetical protein SCO2880 [Streptomyces coelicolor A3(2)]	7.86	1	1	1	4	8049076	1.42815	2.25753	0.632588	16.2533	7.86	2	4	140	14.7264	5.46533		Score A(3,6)	The protein score, which is the sum of the scores of the individual peptides.
21219297	cytochrome P450 [Streptomyces coelicolor A3(2)]	44.17	1	17	17	75	1.35559e+08	1.42696	1.68913	0.85171	228.861	44.17	33	75	412	45.2436	5.99854		Coverage A(3,6)	The percent coverage calculated by dividing the number of amino acids in all found peptides by the total number of amino acids in the entire protein sequence.
21220056	lipoprotein [Streptomyces coelicolor A3(2)]	9.09	1	2	2	6	1.71786e+07	1.4143	1.09733	1.2888	24.9441	9.09	4	6	275	29.0279	4.94482		# Peptides A(3,6)	The number of peptide sequences in the protein group.
21219384	hypothetical protein SCO0863 [Streptomyces coelicolor A3(2)]	10.72	1	3	3	8	2.56254e+07	1.4104	1.41997	1.00445	26.7379	10.72	6	8	485	50.9821	9.30518		# PSM A(3,6)	The total number of identified peptide sequences (peptide spectrum matches) for the protein, including those redundantly identified.
21219036	peptide monooxygenase, partial [Streptomyces coelicolor A3(2)]	23.5	1	9	9	37	5.53134e+07	1.40594	1.43165	1.0104	130.431	23.5	17	37	451	49.8201	5.33838		# AAs	The calculated parameters of the protein based on the amino acid sequence in the FASTA database used to generate the report.
21218848	oxidoreductase [Streptomyces coelicolor A3(2)]	13.95	1	2	2	6	2.52247e+07	1.40433	1.11433	1.37906	24.3055	13.95	4	6	294	30.8871	5.45264		MW [kDa]	The calculated parameters of the protein based on the amino acid sequence in the FASTA database used to generate the report.
21224872	DNA-binding protein [Streptomyces coelicolor A3(2)]	8.43	1	1	2	4	5.78501e+07	1.40137	1.02719	1.20498	1.9285	8.43	2	4	332	37.5913	5.13525		calc. pI	The calculated parameters of the protein based on the amino acid sequence in the FASTA database used to generate the report.
21219604	hypothetical protein SCO1089 [Streptomyces coelicolor A3(2)]	58.67	2	26	26	134	3.29581e+08	1.39022	1.0539	1.24402	400.946	58.67	51	134	467	52.8757	5.07178
21223593	ribonucleotide-diphosphate reductase small chain [Streptomyces coelicolor A3(2)]	8.45	1	2	2	6	2.19157e+07	1.38894	0.90311	1.55903	20.723	8.45	4	6	343	39.6275	4.83057
21219037	formyltransferase [Streptomyces coelicolor A3(2)]	69.84	1	14	14	90	3.65048e+08	1.37884	1.63852	0.865023	323.984	69.84	27	90	315	35.321	5.90967
21218736	zinc-containing dehydrogenase [Streptomyces coelicolor A3(2)]	63.76	1	15	15	92	5.04461e+08	1.37323	1.19404	1.15671	325.994	63.76	30	92	356	37.3023	5.18604
21219510	hypothetical protein SCO0993 [Streptomyces coelicolor A3(2)]	40.05	1	10	10	48	5.38149e+07	1.3645	1.41446	0.942812	207.874	40.05	20	48	412	43.983	5.04639
21221288	endoglucanase [Streptomyces coelicolor A3(2)]	8.13	1	1	1	1	0	1.35607	1.28658	1.05397	0	8.13	1	1	332	34.9742	4.97021
21223934	sugar transporter [Streptomyces coelicolor A3(2)]	3.81	1	2	2	8	3.43949e+07	1.35034	1.04931	1.14432	21.4544	3.81	4	8	472	50.3545	6.55127
21219210	ferredoxin/ferredoxin-NADP reductase [Streptomyces coelicolor A3(2)]	38.11	1	16	16	56	65500111	1.34379	1.54185	0.893173	180.318	38.11	31	56	454	49.7834	5.04639
21221795	exporter [Streptomyces coelicolor A3(2)]	4.9	1	2	2	8	3.30849e+07	1.33709	0.964508	1.38726	32.3856	4.9	4	8	531	55.1799	9.17334
21226031	transcriptional regulator [Streptomyces coelicolor A3(2)]	2.35	1	1	1	1	1.80212e+08	1.334	0.571737	2.33315	1.78681	2.35	1	1	255	26.1753	10.9751
21220725	3-methyl-2-oxobutanoate hydroxymethyltransferase [Streptomyces coelicolor A3(2)]	16.84	1	4	4	16	2.06613e+07	1.32429	1.07573	1.21372	45.0009	16.84	8	16	291	30.8438	5.85889
21222244	dehydrogenase [Streptomyces coelicolor A3(2)]	35.17	1	14	14	75	1.49511e+08	1.32425	1.22949	1.0966	282.888	35.17	28	75	563	59.9733	5.24951
21221219	ATP/GTP-binding protein [Streptomyces coelicolor A3(2)]	3.1	1	1	1	1	4.87674e+06	1.32332	0.943703	1.40221	0	3.1	1	1	743	79.2703	6.63916
21220525	phosphoribosyl-AMP cyclohydrolase [Streptomyces coelicolor A3(2)]	10.16	1	1	1	2	1.28444e+07	1.31243	1.33735	0.981324	7.2701	10.16	2	2	128	13.8257	5.23682
21223749	hypothetical protein SCO5389 [Streptomyces coelicolor A3(2)]	51.54	1	5	5	22	4.30926e+08	1.30518	1.54818	0.844263	85.344	51.54	10	22	130	14.2941	4.84326
21223318	dehydrogenase [Streptomyces coelicolor A3(2)]	21.39	1	4	4	22	4.7575e+07	1.29876	0.972825	1.12541	86.4131	21.39	8	22	346	36.4714	4.95752
21225093	2-amino-3-ketobutyrate coenzyme A ligase [Streptomyces coelicolor A3(2)]	17.38	1	7	7	32	3.38877e+07	1.29711	1.03471	1.25393	101.003	17.38	14	32	397	42.6498	5.35107
21219606	acetyltransferase [Streptomyces coelicolor A3(2)]	10.61	1	1	1	1	0	1.29307	1.98719	0.650675	2.93679	10.61	1	1	179	19.772	5.42725
21225737	phenylacetate-CoA ligase [Streptomyces coelicolor A3(2)]	6.47	1	1	1	2	0	1.28788	1.61007	0.799856	0	6.47	1	2	448	49.8284	5.99854
21223687	oxidoreductase [Streptomyces coelicolor A3(2)]	17.7	1	1	1	1	0	1.28587	0.842706	1.52582	0	17.7	1	1	226	25.3789	7.07861
21219866	hypothetical protein SCO1361 [Streptomyces coelicolor A3(2)]	56.58	1	8	8	26	4.82117e+07	1.27926	1.27412	0.972825	87.8446	56.58	15	26	228	24.3725	6.60986
21225739	phenylacetate-CoA oxygenase subunit PaaA [Streptomyces coelicolor A3(2)]	2.74	1	1	1	2	7.0186e+06	1.27886	1.01195	1.2637	4.61063	2.74	2	2	328	37.2783	6.46826
21220305	3-oxacyl-ACP reductase [Streptomyces coelicolor A3(2)]	52.14	1	10	10	57	1.26082e+08	1.27714	1.09568	1.12557	197.561	52.14	20	57	234	24.8169	6.59521
21221666	hydrolase [Streptomyces coelicolor A3(2)]	12.87	1	3	3	8	2.44579e+07	1.27701	2.99848	0.406869	19.037	12.87	6	8	272	29.4591	5.2876
21221771	hypothetical protein SCO3341 [Streptomyces coelicolor A3(2)]	27.54	1	1	1	1	0	1.27134	1.28667	0.988047	0	27.54	1	1	167	18.5535	10.1108
21226030	hydrolase [Streptomyces coelicolor A3(2)]	3.88	1	1	1	4	4.80986e+06	1.27032	1.48202	0.85712	14.0503	3.88	2	4	309	34.0037	5.45264
21220293	oxidoreductase [Streptomyces coelicolor A3(2)]	35.5	1	4	4	12	2.3697e+07	1.27016	1.53468	0.802556	42.8613	35.5	7	12	231	23.7747	4.85596
21218863	decarboxylase [Streptomyces coelicolor A3(2)]	35.18	1	10	10	48	7.96053e+07	1.26298	1.12979	1.07931	166.6	35.18	20	48	452	47.2312	5.19873
21220863	hypothetical protein SCO2396 [Streptomyces coelicolor A3(2)]	10.07	1	1	1	4	3.98284e+07	1.26221	1.0721	1.17728	19.7176	10.07	2	4	139	14.2271	4.88135
21221652	transcriptional regulator [Streptomyces coelicolor A3(2)]	1.88	1	1	1	2	4.81265e+08	1.26178	0.954158	1.32235	2.03999	1.88	1	2	638	70.1475	6.03662
21224928	hypothetical protein SCO6631 [Streptomyces coelicolor A3(2)]	4.81	1	1	1	1	4.70864e+07	1.24985	1.10166	1.13447	2.47687	4.81	1	1	291	30.9603	7.13721
21223939	ammonium transporter [Streptomyces coelicolor A3(2)]	10.71	1	3	3	10	6.83676e+07	1.2492	0.822222	1.40358	51.6027	10.71	6	10	448	46.2929	5.2876
21220657	2-oxoacid dehydrogenase subunit E1 [Streptomyces coelicolor A3(2)]	39.71	3	27	27	117	9.89948e+07	1.2426	1.12955	1.1125	377.588	39.71	52	117	899	98.7386	5.75732
21222997	nucleotide-binding protein [Streptomyces coelicolor A3(2)]	71.6	1	10	10	72	4.27719e+08	1.24227	1.23916	0.997566	259.13	71.6	20	72	162	17.9484	5.47803
21218770	nitrate reductase subunit alpha NarG2 [Streptomyces coelicolor A3(2)]	8.11	1	7	8	39	8.71635e+07	1.23801	0.921502	1.29885	122.192	8.11	16	39	1233	137.03	6.48096
21222509	peptidase [Streptomyces coelicolor A3(2)]	7.78	1	3	3	11	2.56477e+07	1.23731	0.814	1.56788	28.4099	7.78	5	11	347	35.4107	5.96045
21224611	dihydropicolinate synthase [Streptomyces coelicolor A3(2)]	8.72	1	2	2	3	1.94609e+07	1.2304	1.25222	0.982531	6.19801	8.72	3	3	298	32.1343	5.40186
21224523	esterase [Streptomyces coelicolor A3(2)]	2.83	1	1	2	3	1.19326e+07	1.22778	0.897878	1.36736	10.0833	2.83	3	3	743	74.3546	4.81787
21223367	hypothetical protein SCO4994 [Streptomyces coelicolor A3(2)]	3.15	1	1	1	4	1.06885e+07	1.22736	0.751484	1.63318	12.3504	3.15	2	4	317	34.3339	6.97607
21221497	hypothetical protein SCO3055 [Streptomyces coelicolor A3(2)]	35.29	1	3	3	14	7.52241e+07	1.22614	1.27675	0.930919	41.0554	35.29	6	14	119	12.7223	4.58936
21224823	hypothetical protein SCO6521 [Streptomyces coelicolor A3(2)]	6.29	1	1	1	2	2.83577e+07	1.22587	1.12834	1.0864	0	6.29	1	2	318	29.8331	4.36084
21223767	hypothetical protein SCO5407 [Streptomyces coelicolor A3(2)]	6.39	1	1	1	2	1.21305e+07	1.22584	1.06348	1.15262	2.64867	6.39	2	2	219	23.2386	6.63916
21223759	acetyl-CoA acetyltransferase [Streptomyces coelicolor A3(2)]	67.33	1	19	19	131	4.19847e+08	1.22418	0.475195	2.54789	498.851	67.33	38	131	401	40.9042	5.88428
21220573	hypothetical protein SCO2093 [Streptomyces coelicolor A3(2)]	22.75	1	4	4	15	6.53474e+07	1.221	1.20901	1.00684	38.7043	22.75	7	15	167	18.4193	5.56689
21224223	RedY protein [Streptomyces coelicolor A3(2)]	80.19	1	6	6	41	6.75508e+08	1.22058	1.11639	1.056	123.16	80.19	10	41	106	12.1379	4.97021
21223998	ABC transporter [Streptomyces coelicolor A3(2)]	5.97	1	1	1	1	5.66886e+06	1.21766	1.33922	0.909186	0	5.97	1	1	553	59.0485	11.1362
21220682	glutamine synthetase [Streptomyces coelicolor A3(2)]	91.25	1	17	17	203	1.90944e+09	1.21664	0.972871	1.26237	757.975	91.25	32	203	343	37.1682	4.76709
21222211	aminopeptidase 2 [Streptomyces coelicolor A3(2)]	21.53	1	6	6	22	3.97708e+07	1.21545	1.22314	0.996086	81.2522	21.53	12	22	432	45.9421	6.354
21223648	two-component system sensor kinase [Streptomyces coelicolor A3(2)]	8.8	1	1	1	1	1.71077e+06	1.21503	1.60221	0.758313	0	8.8	1	1	375	40.7966	9.18799
21221749	porphobilinogen deaminase [Streptomyces coelicolor A3(2)]	18.5	1	3	3	9	3.70598e+07	1.21297	1.07574	0.951887	32.3809	18.5	5	9	319	33.1163	5.16064
21225777	glyceraldehyde 3-phosphate dehydrogenase [Streptomyces coelicolor A3(2)]	50.3	1	11	11	62	3.22536e+08	1.20947	0.904916	1.35623	230.323	50.3	22	62	332	34.9463	5.69385
21220407	aminotransferase [Streptomyces coelicolor A3(2)]	57.89	1	17	17	89	2.44049e+08	1.20847	1.21325	0.971255	347.142	57.89	34	89	418	45.8734	5.32568
21223585	anti-sigma factor [Streptomyces coelicolor A3(2)]	11.43	1	1	1	2	7.56297e+06	1.20711	0.984342	1.22626	6.12494	11.43	2	2	105	11.6734	4.81787
21225216	O-methyltransferase [Streptomyces coelicolor A3(2)]	1.44	1	1	1	2	5.91355e+06	1.20391	1.44967	0.830437	2.48226	1.44	2	2	696	75.8396	5.66846
21220096	50S ribosomal protein L35 [Streptomyces coelicolor A3(2)]	51.56	1	4	4	32	2.25599e+08	1.20383	1.2608	1.01682	97.5662	51.56	7	32	64	7.01795	11.6636
21219589	hypothetical protein SCO1074 [Streptomyces coelicolor A3(2)]	34.15	1	11	11	62	1.07241e+08	1.20382	1.12385	1.06919	238.851	34.15	22	62	451	47.5461	4.729
21223624	methyltransferase [Streptomyces coelicolor A3(2)]	62.45	1	9	9	36	7.70101e+07	1.20373	1.29935	0.913129	122.03	62.45	17	36	269	29.5235	4.84326
21220997	hypothetical protein SCO2538 [Streptomyces coelicolor A3(2)]	46.21	1	4	4	16	5.49954e+07	1.20323	1.16216	1.05032	73.4184	46.21	8	16	132	13.1027	5.07178
21223804	hypothetical protein SCO5446 [Streptomyces coelicolor A3(2)]	2.19	1	1	1	4	1.96541e+07	1.20255	2.63625	0.456139	13.2326	2.19	2	4	549	56.9956	5.17334
21222491	valine dehydrogenase [Streptomyces coelicolor A3(2)]	55.49	1	14	14	104	282655562	1.20123	1.11691	1.07951	419.807	55.49	28	104	364	38.2854	5.87158
21222743	oxidoreductase [Streptomyces coelicolor A3(2)]	64.55	3	17	17	111	5.14853e+08	1.1986	1.16092	1.01444	367.054	64.55	32	111	330	36.0945	5.57959
21225955	hypothetical protein SCO7695 [Streptomyces coelicolor A3(2)]	13.93	1	1	1	4	2.24269e+07	1.19581	1.15207	1.03792	19.7443	13.93	2	4	122	12.8655	5.32568
21221183	acetyltransferase [Streptomyces coelicolor A3(2)]	12.38	1	1	1	1	0	1.1948	1.49364	0.799896	0	12.38	1	1	202	22.6284	5.24951
21222689	chaperonin GroEL [Streptomyces coelicolor A3(2)]	85.21	1	40	42	774	2.30113e+09	1.19403	1.08315	1.07055	2930.34	85.21	82	774	541	56.7949	4.86865
21220941	reductase [Streptomyces coelicolor A3(2)]	6.15	1	1	1	2	9352060	1.19295	1.79849	0.663278	6.60643	6.15	2	2	195	21.0489	6.34131
21224294	regulatory protein [Streptomyces coelicolor A3(2)]	14.44	1	1	1	1	0	1.19225	0.949401	1.25574	0	14.44	1	1	270	28.7572	9.5249
21218762	pyruvate phosphate dikinase [Streptomyces coelicolor A3(2)]	50.78	1	33	33	155	1.36141e+08	1.18985	1.14648	1.05359	519.992	50.78	65	155	898	95.9389	5.08447
21224077	hypothetical protein SCO5730 [Streptomyces coelicolor A3(2)]	4.29	1	1	1	1	1221761	1.18926	1.41282	0.841731	0	4.29	1	1	140	15.4997	9.78857
21222626	lipoprotein [Streptomyces coelicolor A3(2)]	15.35	1	3	3	12	3.67033e+07	1.18837	0.901075	1.18421	46.2626	15.35	6	12	241	23.5034	4.41162
21223141	chaperonin GroEL [Streptomyces coelicolor A3(2)]	84.47	1	41	43	386	1.34091e+09	1.18521	1.08634	1.05822	1343.37	84.47	83	386	541	57.0842	4.98291
21222690	oxidoreductase [Streptomyces coelicolor A3(2)]	22.34	1	5	5	29	2.89049e+07	1.18256	1.1846	1.00041	108.343	22.34	10	29	376	40.3184	5.12256
21218950	methyltransferase [Streptomyces coelicolor A3(2)]	3.05	1	1	1	2	7.44219e+06	1.18204	1.13415	1.04219	4.31344	3.05	2	2	262	28.9108	5.51611
32141126	hypothetical protein SCO0913, partial [Streptomyces coelicolor A3(2)]	12.69	1	3	3	6	1.82108e+07	1.182	1.20791	0.96505	16.0483	12.69	5	6	323	34.8892	4.91943
21224313	ornithine carbamoyltransferase [Streptomyces coelicolor A3(2)]	10.15	1	4	4	11	2.31592e+07	1.17902	1.16605	0.972469	31.0223	10.15	6	11	335	36.6786	5.2876
21223716	threonine synthase [Streptomyces coelicolor A3(2)]	51.7	1	10	10	51	8.02727e+07	1.17898	0.869753	1.30418	186.965	51.7	20	51	352	36.7479	5.57959
21225506	hypothetical protein SCO7229 [Streptomyces coelicolor A3(2)]	10.83	1	1	1	1	1.22869e+07	1.17646	1.35453	0.868504	0	10.83	1	1	314	32.4851	7.86963
21224530	oxidoreductase [Streptomyces coelicolor A3(2)]	7.89	1	2	2	8	1.80431e+07	1.17508	1.20132	1.00314	29.701	7.89	4	8	279	29.6171	4.64014
21219404	oxidoreductase [Streptomyces coelicolor A3(2)]	52.41	1	15	15	70	1.86079e+08	1.17345	1.17529	0.993893	244.543	52.41	29	70	477	50.1698	5.24951
21223095	30S ribosomal protein S14 [Streptomyces coelicolor A3(2)]	13.11	1	1	1	4	481528268	1.17124	1.05299	1.11225	8.31992	13.11	2	4	61	6.9447	11.0044
21220116	glycine/betaine ABC transporter permease [Streptomyces coelicolor A3(2)]	18.37	1	13	13	52	7.1702e+07	1.16813	1.00448	1.1432	158.785	18.37	25	52	871	94.9683	5.31299
21223027	aspartate aminotransferase [Streptomyces coelicolor A3(2)]	63.48	3	15	15	124	5.80448e+08	1.16748	1.06333	1.08534	441.302	63.48	30	124	408	43.4556	5.09717
21224071	hypothetical protein SCO5724 [Streptomyces coelicolor A3(2)]	33.06	1	4	4	18	3.14068e+07	1.16723	1.34843	0.831701	57.5524	33.06	8	18	124	13.8588	4.90674
21220201	aldehyde dehydrogenase [Streptomyces coelicolor A3(2)]	28.57	2	8	9	44	5.00166e+07	1.16631	1.0825	1.07477	176.867	28.57	18	44	462	47.9186	5.33838
21221847	aldehyde dehydrogenase [Streptomyces coelicolor A3(2)]	37.86	1	11	11	50	1.59005e+08	1.16583	1.11394	1.04948	183.848	37.86	22	50	486	51.9349	5.10986
21225891	isomerase [Streptomyces coelicolor A3(2)]	31.25	1	3	3	5	2.17443e+07	1.16364	1.24167	0.937112	17.4997	31.25	5	5	224	23.2698	4.89404
21220328	transcriptional regulator [Streptomyces coelicolor A3(2)]	49.32	2	8	8	51	4.78466e+08	1.16348	0.490673	2.36077	70.7338	49.32	16	51	73	7.6651	10.5356
21224564	malate synthase [Streptomyces coelicolor A3(2)]	29.26	2	15	15	70	1.56224e+08	1.16276	1.08326	1.05168	175.789	29.26	29	70	540	59.9537	5.16064
21220342	precorrin-2 C20-methyltransferase [Streptomyces coelicolor A3(2)]	51.44	1	7	7	28	5.13599e+07	1.1627	1.11154	0.993192	76.9492	51.44	14	28	243	25.0862	5.46533
21221491	acyl-CoA hydrolase [Streptomyces coelicolor A3(2)]	4.06	1	1	1	4	1.24218e+07	1.16259	1.051	1.10613	6.18251	4.06	2	4	197	21.547	8.49951
21219380	hypothetical protein SCO0859 [Streptomyces coelicolor A3(2)]	5.92	1	1	1	2	0	1.16221	1.09961	1.05689	2.10454	5.92	2	2	169	17.428	7.47412
21221632	1-phosphofructokinase [Streptomyces coelicolor A3(2)]	40	3	9	9	52	1.81803e+08	1.16177	1.01004	1.15339	155.019	40	18	52	315	31.8498	4.97021
21220151	lipoprotein oligopeptide binding protein [Streptomyces coelicolor A3(2)]	1.5	1	1	1	2	2.98602e+06	1.16136	1.14906	1.01066	0	1.5	2	2	534	57.6807	4.80518
21224833	ATP/GTP binding protein [Streptomyces coelicolor A3(2)]	95.04	1	7	7	144	2.14342e+09	1.16128	1.27451	0.88046	627.015	95.04	14	144	141	14.3251	5.14795
21222595	hypothetical protein SCO4199 [Streptomyces coelicolor A3(2)]	62.91	1	14	14	179	2.41766e+09	1.16103	0.684196	1.69999	685.593	62.91	26	179	213	22.7941	9.27588
21220632	cytochrome c oxidase subunit I [Streptomyces coelicolor A3(2)]	11.94	1	4	4	15	5.03152e+07	1.16046	1.19679	0.959111	42.2111	11.94	7	15	578	64.0797	7.1665
21219843	oxidoreductase [Streptomyces coelicolor A3(2)]	4.98	1	1	1	4	8.264e+06	1.16007	1.20796	0.960311	15.6245	4.98	2	4	301	32.5803	6.46826
21222285	6-phosphogluconate dehydrogenase [Streptomyces coelicolor A3(2)]	78.01	1	15	19	151	6.20661e+08	1.15911	1.04645	1.12044	453.535	78.01	38	151	291	31.4376	4.94482
21224992	3-carboxy-cis,cis-muconate cycloisomerase [Streptomyces coelicolor A3(2)]	3.08	1	1	1	1	0	1.1586	0.94872	1.22118	2.03873	3.08	1	1	454	46.8036	5.65576
21220500	aminopeptidase [Streptomyces coelicolor A3(2)]	9.46	1	7	7	22	4.05884e+07	1.15819	1.20882	0.952563	68.1533	9.46	14	22	835	92.3462	5.21143
21220427	glucose-6-phosphate isomerase [Streptomyces coelicolor A3(2)]	43.56	1	6	17	102	3.56528e+08	1.15746	1.06331	0.998502	337.467	43.56	32	102	551	60.5319	5.77002
21223981	uridylate kinase [Streptomyces coelicolor A3(2)]	31.62	1	7	7	33	7.73746e+07	1.1569	1.05013	1.1067	120.211	31.62	14	33	253	26.8166	5.2749
21220080	arabinosidase [Streptomyces coelicolor A3(2)]	4.61	1	1	1	2	852741	1.15611	1.15316	1.00252	0	4.61	1	2	824	89.8439	5.21143
21219883	glycine dehydrogenase [Streptomyces coelicolor A3(2)]	19.46	1	12	12	52	4.32485e+07	1.15517	1.02164	1.13453	199.132	19.46	22	52	961	102.744	5.60498
21223090	50S ribosomal protein L29 [Streptomyces coelicolor A3(2)]	44.59	1	4	4	22	9.87042e+08	1.15469	1.19632	0.878546	80.3326	44.59	8	22	74	8.39646	7.26904
21223460	actinorhodin polyketide synthase ACP [Streptomyces coelicolor A3(2)]	75.58	1	4	4	49	908969592	1.15384	1.11166	1.05939	189.18	75.58	8	49	86	9.24257	4.18311
21225561	ribonuclease H [Streptomyces coelicolor A3(2)]	4.26	1	1	1	4	2.89231e+06	1.15331	1.16332	0.991358	15.1417	4.26	2	4	235	24.8116	8.96826
21222138	hypothetical protein SCO3726 [Streptomyces coelicolor A3(2)]	27.67	1	5	5	12	1.95323e+07	1.15231	1.15123	0.993367	40.1899	27.67	10	12	206	21.6112	7.40088
21223393	hypothetical protein SCO5020 [Streptomyces coelicolor A3(2)]	8.99	1	1	1	1	0	1.15015	1.27386	0.902851	0	8.99	1	1	178	19.6687	5.13525
21225112	3-phosphoshikimate 1-carboxyvinyltransferase [Streptomyces coelicolor A3(2)]	43.86	1	15	15	70	8.68582e+07	1.14943	1.1441	0.996424	224.693	43.86	30	70	440	46.5006	5.40186
32141282	1-deoxy-D-xylulose-5-phosphate synthase [Streptomyces coelicolor A3(2)]	2.02	1	1	1	4	16731759	1.14915	0.817746	1.40521	15.7861	2.02	2	4	642	68.5726	5.94775
21219803	hypothetical protein SCO1296 [Streptomyces coelicolor A3(2)]	51.96	1	20	20	101	1.72456e+08	1.14895	1.18816	0.955723	351.914	51.96	39	101	562	62.5091	4.95752
21220212	regulator [Streptomyces coelicolor A3(2)]	10.68	1	1	1	1	0	1.14794	1.15539	0.993513	0	10.68	1	1	234	25.8709	5.65576
21222686	threonine synthase [Streptomyces coelicolor A3(2)]	52.57	1	14	14	81	1.86206e+08	1.14729	0.916833	1.17695	299.641	52.57	28	81	428	45.155	4.90674
21224885	succinyl-CoA synthetase subunit beta [Streptomyces coelicolor A3(2)]	4.18	1	1	1	2	9.6361e+06	1.14721	0.725012	1.58227	0	4.18	1	2	383	40.137	5.66846
21221618	UTP-glucose-1-phosphate uridylyltransferase [Streptomyces coelicolor A3(2)]	47.85	1	10	10	37	1.1486e+08	1.1472	1.15798	1.00193	116.866	47.85	20	37	303	33.1069	5.45264
32141287	peptide-binding transport protein, partial [Streptomyces coelicolor A3(2)]	1.16	1	1	1	1	303263600	1.14656	1.05729	1.08438	0	1.16	1	1	602	65.8581	5.26221
21221664	CDA peptide synthetase I [Streptomyces coelicolor A3(2)]	0.33	5	2	2	3	3.44546e+06	1.14615	2.42944	0.471757	2.28267	0.33	3	3	7463	798.138	5.51611
21218724	hypothetical protein SCO0167 [Streptomyces coelicolor A3(2)]	40.48	1	7	7	28	40458027	1.14606	1.0859	1.07313	111.444	40.48	13	28	294	30.994	5.99854
21220767	KHG/KDPG aldolase [Streptomyces coelicolor A3(2)]	43.84	1	5	5	20	4.71411e+07	1.1458	1.22888	0.930566	72.0877	43.84	10	20	219	21.9276	4.80518
21223034	50S ribosomal protein L10 [Streptomyces coelicolor A3(2)]	81.25	1	14	14	71	2.7371e+08	1.14573	0.946446	1.1921	193.388	81.25	26	71	176	18.6349	8.82178
21223089	50S ribosomal protein L16 [Streptomyces coelicolor A3(2)]	34.53	1	4	4	25	2.91942e+08	1.14493	1.11746	1.00277	66.2906	34.53	8	25	139	15.8335	11.019
21220011	peptidyl-prolyl cis-trans isomerase [Streptomyces coelicolor A3(2)]	6.14	1	1	1	4	3.342e+07	1.14461	1.01797	1.12436	17.3668	6.14	2	4	277	29.4679	9.02686
21220355	hydroxylase [Streptomyces coelicolor A3(2)]	47.14	1	10	10	49	8.54755e+07	1.14434	1.06853	1.11096	158.629	47.14	19	49	280	30.8233	5.40186
21222439	hypothetical protein SCO4036 [Streptomyces coelicolor A3(2)]	78.35	1	5	5	18	6.64303e+07	1.14353	1.05843	1.03441	55.4849	78.35	10	18	97	11.1136	5.021
32141283	protoporphyrinogen oxidase, partial [Streptomyces coelicolor A3(2)]	30.97	1	11	11	44	7.62812e+07	1.14327	1.03881	1.0356	137.475	30.97	20	44	494	50.6405	5.93506
21219032	iron-siderophore binding lipoprotein [Streptomyces coelicolor A3(2)]	15.71	1	5	5	15	2.2252e+07	1.143	1.45175	0.804042	53.3762	15.71	9	15	350	37.3521	5.10986
21222297	thioredoxin reductase [Streptomyces coelicolor A3(2)]	54.97	2	13	13	85	4.114e+08	1.14143	1.07419	1.06731	326.324	54.97	26	85	322	34.2073	5.0083
21224308	hypothetical protein SCO5971 [Streptomyces coelicolor A3(2)]	62.21	1	13	13	55	1.53964e+08	1.1406	1.10517	1.00414	203.133	62.21	26	55	307	33.144	5.17334
21223233	succinate dehydrogenase membrane subunit [Streptomyces coelicolor A3(2)]	8.13	1	1	1	2	3.77786e+07	1.14023	1.26049	0.904555	5.25411	8.13	2	2	160	17.5754	9.77393
21224008	aldehyde dehydrogenase [Streptomyces coelicolor A3(2)]	64.3	1	23	23	140	3.84945e+08	1.13847	1.12456	1.00982	449.505	64.3	43	140	479	51.7278	5.23682
21222374	Xaa-Pro aminopeptidase [Streptomyces coelicolor A3(2)]	75.97	2	33	33	220	8.98382e+08	1.13772	0.992589	1.14681	730.238	75.97	65	220	491	54.015	4.70361
32141225	oxidoreductase, partial [Streptomyces coelicolor A3(2)]	47.45	1	13	13	89	5.40371e+08	1.13745	1.12864	1.0022	266.184	47.45	26	89	314	33.3512	5.16064
21223101	50S ribosomal protein L15 [Streptomyces coelicolor A3(2)]	54.97	1	7	7	91	8.20929e+08	1.13724	1.13314	1.02526	383.12	54.97	13	91	151	15.9377	10.1255
21223472	hypothetical protein SCO5101 [Streptomyces coelicolor A3(2)]	31.75	1	2	2	10	1.74585e+08	1.13672	0.977165	1.20695	36.7154	31.75	4	10	63	7.03249	5.97314
21224842	pterin-4-alpha-carbinolamine dehydratase [Streptomyces coelicolor A3(2)]	11.88	1	1	1	4	3.57802e+07	1.13663	1.20319	0.944644	6.77719	11.88	2	4	101	10.8154	6.03662
21223741	hypothetical protein SCO5381 [Streptomyces coelicolor A3(2)]	48.95	1	6	6	48	1.13606e+08	1.1364	1.12794	1.05262	127.365	48.95	12	48	190	20.6998	5.13525
21222691	carboxylesterase [Streptomyces coelicolor A3(2)]	27.49	1	11	11	52	1.33056e+08	1.13622	1.07538	1.07035	173.376	27.49	22	52	513	54.0282	5.03369
21221484	hypothetical protein SCO3041 [Streptomyces coelicolor A3(2)]	15.59	1	2	2	6	2.98437e+07	1.13385	1.1137	1.02148	21.9566	15.59	4	6	263	27.078	4.70361
21221998	hypothetical protein SCO3581 [Streptomyces coelicolor A3(2)]	39.61	1	5	5	24	7.66775e+07	1.13322	1.07507	1.05455	94.284	39.61	10	24	154	16.4778	8.30908
21220029	hypothetical protein SCO1529 [Streptomyces coelicolor A3(2)]	2.72	1	1	1	2	1.98339e+07	1.13297	1.22206	0.927054	0	2.72	1	2	551	61.1601	9.20264
21222966	polyprenyl diphosphate synthase [Streptomyces coelicolor A3(2)]	22.62	1	3	3	6	2.22508e+07	1.13295	1.19831	0.82359	25.5535	22.62	5	6	336	35.8705	4.84326
21220101	hypothetical protein SCO1604 [Streptomyces coelicolor A3(2)]	8.57	1	1	1	4	4.90907e+07	1.13149	1.40129	0.807431	20.0714	8.57	2	4	175	19.0884	5.35107
21225893	hypothetical protein SCO7632 [Streptomyces coelicolor A3(2)]	40.79	1	7	7	37	1.24805e+08	1.13147	1.27545	0.838909	112.928	40.79	14	37	277	30.3295	4.83057
21221986	hypothetical protein SCO3568 [Streptomyces coelicolor A3(2)]	8.5	1	2	2	8	296177949	1.13141	1.13618	1.01293	13.8221	8.5	3	8	247	26.4927	5.36377
21221404	nitrate extrusion protein [Streptomyces coelicolor A3(2)]	5.75	1	3	3	14	1.42125e+07	1.13008	1.06449	1.06919	52.8675	5.75	6	14	452	47.7343	10.1108
21223447	hypothetical protein SCO5076 [Streptomyces coelicolor A3(2)]	14.07	1	3	3	9	1.23037e+08	1.12989	1.16232	1.14846	14.2307	14.07	5	9	533	54.5113	9.68604
21221236	hypothetical protein SCO2785 [Streptomyces coelicolor A3(2)]	21.18	1	9	9	22	4.36809e+07	1.12948	1.22728	0.902365	74.4691	21.18	16	22	595	66.5477	5.2749
21220546	hypothetical protein SCO2065 [Streptomyces coelicolor A3(2)]	36.32	1	11	11	63	1.7043e+08	1.12742	1.05644	1.06732	239.053	36.32	22	63	446	49.0025	4.95752
21224426	sulfate adenylyltransferase subunit 1 [Streptomyces coelicolor A3(2)]	7.54	1	1	1	1	0	1.1273	1.25079	0.901234	0	7.54	1	1	451	48.3908	4.94482
32141118	tellurium resistance protein, partial [Streptomyces coelicolor A3(2)]	88.48	1	7	10	249	1650904695	1.12686	1.16816	0.951453	959.597	88.48	19	249	191	20.168	4.62744
21220796	dipeptidase [Streptomyces coelicolor A3(2)]	8.26	1	2	2	10	1.53768e+07	1.12655	1.15621	0.974307	25.3599	8.26	4	10	218	23.918	5.31299
21221395	DNA-binding protein HU (hs1) [Streptomyces coelicolor A3(2)]	73.12	1	8	8	61	1.75843e+09	1.12648	0.938893	1.22596	223.295	73.12	15	61	93	9.84526	9.46631
21220358	hypothetical protein SCO1870 [Streptomyces coelicolor A3(2)]	33.66	1	4	4	20	7.04529e+07	1.12543	1.2182	0.947914	77.1221	33.66	8	20	202	21.9928	4.81787
21222370	hypothetical protein SCO3966 [Streptomyces coelicolor A3(2)]	37.04	1	7	7	27	5.35339e+07	1.1251	1.22618	0.880635	76.7233	37.04	14	27	216	23.1338	5.49072
21220411	hypothetical protein SCO1925 [Streptomyces coelicolor A3(2)]	71.88	1	27	27	174	2.83423e+08	1.12507	1.1765	0.96748	604.554	71.88	53	174	473	52.6622	5.12256
21224954	6-phosphogluconate dehydrogenase [Streptomyces coelicolor A3(2)]	73.38	1	15	19	124	4.26488e+08	1.12486	1.10445	0.950697	398.783	73.38	37	124	293	31.931	5.43994
21221277	hypothetical protein SCO2827 [Streptomyces coelicolor A3(2)]	48.5	1	6	6	27	1.38343e+08	1.12457	1.13378	0.966531	106.76	48.5	12	27	167	18.2711	4.7417
21220349	hypothetical protein SCO1861 [Streptomyces coelicolor A3(2)]	8.54	1	2	2	6	1.84195e+07	1.12427	1.06245	1.04965	12.876	8.54	4	6	363	39.4013	5.51611
21225916	oxidoreductase [Streptomyces coelicolor A3(2)]	21.29	1	6	6	28	7.41723e+07	1.12383	1.20091	0.934245	84.2955	21.29	12	28	310	34.2765	5.22412
21220243	acyl CoA dehydrogenase [Streptomyces coelicolor A3(2)]	23.17	1	6	6	20	4.22776e+07	1.12205	1.08656	1.07211	55.4844	23.17	12	20	397	42.6296	5.8335
21221616	molybdenum cofactor biosynthesis protein MoaC [Streptomyces coelicolor A3(2)]	17.06	1	2	2	6	1.35634e+07	1.12174	1.05791	1.07813	16.95	17.06	3	6	170	17.6743	6.58057
21222673	reductase [Streptomyces coelicolor A3(2)]	19.8	1	2	2	8	2.37728e+07	1.12121	1.06465	0.988693	33.1145	19.8	4	8	202	21.2718	5.19873
21223871	D-3-phosphoglycerate dehydrogenase [Streptomyces coelicolor A3(2)]	65.97	1	26	26	252	9.42287e+08	1.12076	0.994275	1.11297	968.303	65.97	50	252	529	55.0132	5.0083
21225704	lipoprotein [Streptomyces coelicolor A3(2)]	7.11	1	2	2	3	9.61631e+06	1.12045	0.981388	1.14166	10.4269	7.11	3	3	253	26.5843	4.97021
21222371	hypothetical protein SCO3967 [Streptomyces coelicolor A3(2)]	62.85	1	11	11	119	1.06769e+09	1.12039	1.03465	1.05097	430.197	62.85	22	119	253	25.8271	5.21143
21224363	uroporphyrinogen decarboxylase [Streptomyces coelicolor A3(2)]	45.35	1	11	11	63	2.04956e+08	1.12019	1.06716	1.04764	212.227	45.35	22	63	355	38.145	6.01123
21222206	aspartyl-tRNA synthetase [Streptomyces coelicolor A3(2)]	48.21	1	23	23	102	1.98531e+08	1.12013	1.00714	1.07454	331.981	48.21	43	102	587	65.9602	5.23682
21225286	isocitrate dehydrogenase [Streptomyces coelicolor A3(2)]	82.14	1	55	55	724	2.16542e+09	1.11919	1.12425	0.994384	2302.99	82.14	108	724	739	79.4707	5.18604
21224521	hypothetical protein SCO6197 [Streptomyces coelicolor A3(2)]	22.78	1	6	6	40	1.02306e+08	1.11787	0.972461	1.153	149.966	22.78	12	40	180	19.3837	5.0083
21221243	AraC family transcription regulator [Streptomyces coelicolor A3(2)]	6.78	1	2	2	4	3.06541e+07	1.11738	0.995805	1.12204	15.96	6.78	4	4	398	42.7411	8.76318
21219466	alpha-mannosidase [Streptomyces coelicolor A3(2)]	2.78	1	2	2	6	9.75172e+06	1.11691	1.153	0.968653	25.1129	2.78	4	6	1007	110.759	5.66846
21222605	phosphoglyceromutase [Streptomyces coelicolor A3(2)]	49.01	1	12	12	90	4.2482e+08	1.11688	1.0823	1.01561	293.143	49.01	23	90	253	28.2616	6.53662
21220731	oxidoreductase [Streptomyces coelicolor A3(2)]	53.56	1	10	10	58	3.26109e+08	1.11641	1.11604	0.951718	236.531	53.56	19	58	239	24.931	5.85889
21224437	esterase [Streptomyces coelicolor A3(2)]	24.23	1	10	10	50	1.16569e+08	1.11566	0.950108	1.21602	155.782	24.23	20	50	520	55.3934	5.88428
21224198	thiosulfate sulfurtransferase [Streptomyces coelicolor A3(2)]	16.96	1	3	3	10	2.4672e+07	1.1156	1.13217	0.99281	27.038	16.96	6	10	283	28.9686	4.95752
21225563	oxidoreducatse [Streptomyces coelicolor A3(2)]	31.8	1	9	9	38	1.11097e+08	1.11516	1.17933	0.933918	109.29	31.8	15	38	327	35.8071	4.86865
21223536	hypothetical protein SCO5167 [Streptomyces coelicolor A3(2)]	51.92	1	11	11	56	6.80708e+07	1.11459	1.15982	0.91777	200.435	51.92	20	56	260	27.3037	4.94482
21222117	substrate-binding transport protein [Streptomyces coelicolor A3(2)]	3.72	1	1	1	4	1.59125e+07	1.11392	1.13308	0.983053	12.2903	3.72	2	4	269	27.23	5.52881
21221994	hypothetical protein SCO3576 [Streptomyces coelicolor A3(2)]	84.91	1	2	2	6	7.18899e+07	1.11377	1.79361	0.572386	20.709	84.91	3	6	53	6.08816	5.17334
32141213	molecular chaperone DnaK [Streptomyces coelicolor A3(2)]	84.3	1	46	46	375	1.04578e+09	1.11368	1.04444	1.07499	1389	84.3	88	375	618	66.23	4.86865
21218728	nicotinate phosphoribosyltransferase [Streptomyces coelicolor A3(2)]	14.16	1	6	6	16	3.13292e+07	1.11262	1.08606	1.01676	49.9076	14.16	10	16	438	46.519	6.58057
21221008	protease [Streptomyces coelicolor A3(2)]	44.99	1	32	32	150	1.95406e+08	1.1126	1.09057	1.01991	523.556	44.99	63	150	1067	115.577	5.79541
21223556	glutaredoxin-like protein [Streptomyces coelicolor A3(2)]	27.5	1	1	1	2	2.46513e+08	1.1124	1.12946	0.984851	7.2011	27.5	2	2	80	8.6852	5.24951
21219978	S-adenosylmethionine synthetase [Streptomyces coelicolor A3(2)]	77.11	1	23	24	146	359933964	1.11221	1.10164	1.00711	545.711	77.11	47	146	402	43.4333	5.03369
21220635	kinase [Streptomyces coelicolor A3(2)]	63.02	1	15	15	67	1.26369e+08	1.11202	1.05147	1.04548	236.392	63.02	28	67	338	36.7294	5.2876
21223443	hydroxylacyl-CoA dehydrogenase [Streptomyces coelicolor A3(2)]	50.68	1	6	6	66	2.06563e+09	1.11146	1.14283	0.974193	237.254	50.68	12	66	146	16.1631	6.91748
21225258	precorrin 6A synthase [Streptomyces coelicolor A3(2)]	31.52	1	2	2	3	3.34477e+07	1.11146	1.12702	0.98615	10.4089	31.52	3	3	257	28.5176	5.05908
21224539	hypothetical protein SCO6216 [Streptomyces coelicolor A3(2)]	14.29	1	2	2	6	2.43491e+07	1.11133	1.11651	1.00741	12.4858	14.29	4	6	140	15.463	5.97314
21219981	hypothetical protein SCO1480 [Streptomyces coelicolor A3(2)]	50.47	1	6	6	26	9.60783e+07	1.11122	0.586066	1.84183	73.6618	50.47	12	26	107	11.5483	10.4038
21221554	hypothetical protein SCO3115 [Streptomyces coelicolor A3(2)]	2.14	1	2	2	8	6.42429e+06	1.11104	1.78536	0.639875	16.6142	2.14	4	8	889	87.9758	5.03369
21223204	malate dehydrogenase [Streptomyces coelicolor A3(2)]	59.88	1	17	17	310	3.91259e+09	1.111	1.12397	0.97201	1075.55	59.88	34	310	329	34.6218	5.14795
21218768	hypothetical protein SCO0214 [Streptomyces coelicolor A3(2)]	50.36	1	5	5	20	5.15059e+07	1.11034	1.08887	1.03499	60.2772	50.36	10	20	137	14.5235	5.12256
21221054	50S ribosomal protein L27 [Streptomyces coelicolor A3(2)]	41.67	1	3	3	8	2.63001e+08	1.11008	0.998736	1.0554	25.9801	41.67	5	8	84	8.76864	11.9126
21223329	methionine sulfoxide reductase A [Streptomyces coelicolor A3(2)]	51.74	1	6	6	30	2.23998e+08	1.11001	1.20418	0.978706	123.979	51.74	11	30	172	19.2964	5.0083
21221742	delta-aminolevulinic acid dehydratase [Streptomyces coelicolor A3(2)]	62.73	1	14	14	102	3.088e+08	1.10998	1.06981	1.02612	372.018	62.73	27	102	330	35.4309	5.04639
21219841	oxidoreductase [Streptomyces coelicolor A3(2)]	4.47	1	1	1	1	0	1.10895	0.995699	1.11369	2.12854	4.47	1	1	246	24.6038	7.40088
21220697	isomerase [Streptomyces coelicolor A3(2)]	39.5	1	4	4	20	1.11666e+08	1.10873	1.06263	1.02381	21.2959	39.5	8	20	119	12.9617	5.8208
21223149	inosine 5' monophosphate dehydrogenase [Streptomyces coelicolor A3(2)]	59.08	1	20	20	130	2.92534e+08	1.10848	1.01877	1.04727	530.022	59.08	39	130	501	52.4431	6.63916
21218782	short chain dehydrogenase [Streptomyces coelicolor A3(2)]	22.34	1	4	4	13	2.8281e+07	1.10839	0.992662	1.09119	44.4005	22.34	8	13	282	29.7902	6.354
21222416	penicillin-binding protein [Streptomyces coelicolor A3(2)]	6.26	1	1	1	1	6.26911e+06	1.10825	0.888401	1.24741	0	6.26	1	1	495	52.7567	5.5542
21225034	D-amino acid oxidase [Streptomyces coelicolor A3(2)]	35.94	1	5	5	28	5.55199e+07	1.10814	1.10313	1.01363	105.572	35.94	9	28	320	34.0387	5.10986
21223121	hypothetical protein SCO4742 [Streptomyces coelicolor A3(2)]	5.15	1	1	1	4	3.95397e+07	1.1078	1.01214	1.09447	22.0666	5.15	2	4	485	48.2887	8.646
21224182	protease [Streptomyces coelicolor A3(2)]	45.02	1	19	19	79	198380782	1.10713	1.11689	0.983068	252.757	45.02	38	79	462	48.8802	4.97021
21224438	hydrolase [Streptomyces coelicolor A3(2)]	24.26	1	9	9	59	2.61239e+08	1.10697	0.867831	1.26308	246.763	24.26	18	59	507	52.4439	4.97021
21223446	dehydratase [Streptomyces coelicolor A3(2)]	70.56	1	12	12	389	9.04938e+09	1.1069	1.11638	1.0001	1388.66	70.56	24	389	214	23.1198	8.66064
21225011	acyl-ACP desaturase [Streptomyces coelicolor A3(2)]	20.73	1	5	5	11	2.6655e+07	1.10574	1.08541	1.02767	37.8922	20.73	9	11	328	37.0345	5.71924
21219305	ribose-phosphate pyrophosphokinase [Streptomyces coelicolor A3(2)]	11.36	1	3	3	8	2.396e+07	1.10573	1.10731	1.00792	34.2208	11.36	6	8	317	33.9376	6.59521
21221266	hypothetical protein SCO2816 [Streptomyces coelicolor A3(2)]	3.55	1	1	1	2	1.64652e+07	1.10571	1.09134	1.01312	5.68664	3.55	2	2	366	38.7958	5.71924
21219966	ribulose-phosphate 3-epimerase [Streptomyces coelicolor A3(2)]	31.58	1	4	4	28	1.03761e+08	1.10564	1.0059	1.03785	95.7269	31.58	8	28	228	24.2933	4.89404
21219974	Sun-family protein [Streptomyces coelicolor A3(2)]	2.95	1	1	1	4	3.04655e+07	1.10513	0.981569	1.12583	5.89681	2.95	2	4	475	51.4161	7.06396
21223226	TetR family transcriptional regulator [Streptomyces coelicolor A3(2)]	2.39	1	1	1	3	1.16943e+09	1.10489	1.07931	1.02366	4.35173	2.39	2	3	251	28.2566	7.2251
21224048	prolyl-tRNA synthetase [Streptomyces coelicolor A3(2)]	43.74	1	19	19	92	1.22882e+08	1.10435	1.04059	1.03221	315.252	43.74	38	92	567	61.2147	5.10986
21223847	hypothetical protein SCO5491 [Streptomyces coelicolor A3(2)]	25.27	1	4	4	20	7.34918e+07	1.10418	1.0673	1.02507	66.8944	25.27	8	20	182	19.7091	4.76709
21219327	prolyl aminopeptidase [Streptomyces coelicolor A3(2)]	32.1	1	10	10	57	1.0352e+08	1.10379	1.00093	1.08637	195.449	32.1	19	57	433	47.5512	5.80811
21221993	hypothetical protein SCO3575 [Streptomyces coelicolor A3(2)]	72.9	1	7	7	31	4.85597e+08	1.10348	1.06376	0.985446	93.5727	72.9	12	31	155	15.6944	4.79248
32141117	phosphoketolase, partial [Streptomyces coelicolor A3(2)]	18.36	1	11	11	51	6.36637e+07	1.1023	1.26612	0.883594	175.129	18.36	21	51	817	90.1897	6.34131
21218860	acyl-CoA dehydrogenase [Streptomyces coelicolor A3(2)]	1.54	1	1	1	1	5.29141e+07	1.10208	1.01016	1.09095	1.71139	1.54	1	1	389	42.4417	6.15088
21218692	transcriptional regulator [Streptomyces coelicolor A3(2)]	0.87	1	1	1	2	1.54359e+07	1.10175	1.08357	1.01673	4.05294	0.87	1	2	919	97.4136	6.60986
21222777	pyridoxamine oxidase [Streptomyces coelicolor A3(2)]	8.12	1	1	1	2	2.75912e+07	1.10103	1.0182	1.0813	11.2097	8.12	2	2	234	25.996	6.55127
21220557	hypothetical protein SCO2077 [Streptomyces coelicolor A3(2)]	28.14	1	7	7	35	8.0886e+07	1.10081	0.765753	1.28429	137.901	28.14	14	35	398	41.1139	5.26221
21220338	cobaltochelatase subunit CobN [Streptomyces coelicolor A3(2)]	44.95	1	38	38	203	1.24018e+08	1.10067	1.04259	1.03417	696.09	44.95	74	203	1217	130.823	4.93213
21219311	hypothetical protein SCO0788 [Streptomyces coelicolor A3(2)]	33.33	1	1	1	4	1.69023e+08	1.10034	1.0103	1.08908	21.9477	33.33	2	4	78	8.35033	4.86865
21220088	3-hydroxybutyryl-CoA dehydrogenase [Streptomyces coelicolor A3(2)]	44.55	1	10	10	68	2.33566e+08	1.10029	1.09566	0.945971	220.783	44.55	19	68	303	32.5446	5.05908
21225307	hypothetical protein SCO7022 [Streptomyces coelicolor A3(2)]	12.58	1	1	1	1	0	1.10024	0.887196	1.24008	0	12.58	1	1	310	33.4664	7.35693
21219696	hypothetical protein SCO1185 [Streptomyces coelicolor A3(2)]	3.75	1	1	1	1	2.69233e+06	1.10017	0.858478	1.28148	0	3.75	1	1	667	67.6315	7.57666
21220698	bifunctional alpha-amylase/dextrinase [Streptomyces coelicolor A3(2)]	0.95	1	3	3	6	2.96008e+07	1.10005	1.04645	1.05953	1.6617	0.95	4	6	1798	193.988	5.5415
21222891	hypothetical protein SCO4506 [Streptomyces coelicolor A3(2)]	15.25	1	4	4	9	3.03343e+07	1.09997	1.06637	1.00747	27.612	15.25	6	9	282	31.3381	4.95752
21221250	sugar hydrolase [Streptomyces coelicolor A3(2)]	8.18	1	1	1	1	36035880	1.09977	1.15054	0.955833	0	8.18	1	1	489	49.2933	4.91943
21220002	alanyl-tRNA synthetase [Streptomyces coelicolor A3(2)]	49.1	1	40	40	182	2.52634e+08	1.09943	0.954048	1.14501	579.708	49.1	75	182	890	95.727	5.33838
21226010	anti-sigma factor antagonist [Streptomyces coelicolor A3(2)]	11.02	1	1	1	3	59990753	1.0987	0.731152	1.50556	2.35451	11.02	2	3	127	13.4321	6.29053
21219502	5-methyltetrahydropteroyltriglutamate/homocysteine S-methyltransferase [Streptomyces coelicolor A3(2)]	11.53	1	9	9	30	2.91809e+07	1.09789	0.965869	1.10546	88.1584	11.53	17	30	772	83.6142	5.32568
21223026	adenosine deaminase [Streptomyces coelicolor A3(2)]	5.83	1	1	2	9	1.04788e+07	1.09745	1.00091	1.07157	26.5041	5.83	3	9	343	37.6495	5.75732
21219882	molibdenum binding protein [Streptomyces coelicolor A3(2)]	31.65	1	3	3	12	2.83016e+07	1.09637	1.02393	1.05781	41.0307	31.65	6	12	139	13.7434	5.10986
21222248	hypothetical protein SCO3839 [Streptomyces coelicolor A3(2)]	33.94	1	2	2	8	7.97337e+07	1.09614	1.12694	0.950881	31.3274	33.94	4	8	109	11.5407	4.60205
21225019	hypothetical protein SCO6725 [Streptomyces coelicolor A3(2)]	46.94	1	5	5	22	7.78465e+07	1.09581	1.12589	0.946619	58.7381	46.94	9	22	98	10.6475	4.84326
21220410	hypothetical protein SCO1924 [Streptomyces coelicolor A3(2)]	62.18	1	18	18	118	3.80917e+08	1.09533	1.10094	0.993596	420.539	62.18	33	118	394	41.7812	4.86865
21222155	hypothetical protein SCO3743 [Streptomyces coelicolor A3(2)]	7.04	1	1	1	1	1.01652e+08	1.09445	1.07843	1.01481	2.50192	7.04	1	1	213	22.1307	7.76709
21220159	cysteinyl-tRNA synthetase [Streptomyces coelicolor A3(2)]	52.81	1	16	16	69	1.34555e+08	1.09435	1.1051	1.03566	234.281	52.81	30	69	409	44.1581	5.16064
21221495	esterase [Streptomyces coelicolor A3(2)]	8.07	1	5	5	16	4.36318e+07	1.0943	0.966798	1.15596	57.5702	8.07	9	16	706	74.003	4.98291
21225046	nucleotide sugar-1-phosphate transferase [Streptomyces coelicolor A3(2)]	56.4	1	15	15	71	2.15998e+08	1.09414	1.10602	0.94694	241.667	56.4	30	71	250	27.3031	4.70361
21221494	UDP-glucose 6-dehydrogenase [Streptomyces coelicolor A3(2)]	30.43	1	12	12	46	4.74266e+07	1.09343	1.0099	1.05708	139.171	30.43	22	46	447	47.8446	5.46533
21220247	hypothetical protein SCO1754 [Streptomyces coelicolor A3(2)]	26.76	1	2	2	9	7.37277e+07	1.09327	1.19334	0.855318	28.2558	26.76	3	9	71	7.82496	6.69775
21223523	hypothetical protein SCO5154 [Streptomyces coelicolor A3(2)]	6.93	1	1	1	2	1.19905e+08	1.09289	1.0638	1.0273	2.59349	6.93	2	2	433	47.4694	4.79248
21220023	pyridoxal biosynthesis lyase PdxS [Streptomyces coelicolor A3(2)]	58.42	1	17	17	84	2.15402e+08	1.09286	0.990831	1.10768	265.079	58.42	33	84	303	32.1815	5.24951
21220265	L-alanine dehydrogenase [Streptomyces coelicolor A3(2)]	14.82	1	4	4	14	2.99454e+07	1.09284	0.866336	1.26677	50.0901	14.82	8	14	371	39.5467	6.11279
21222242	transcriptional regulator [Streptomyces coelicolor A3(2)]	7.18	1	1	1	4	1.8586e+07	1.09283	0.71209	1.53461	19.6458	7.18	2	4	209	23.086	6.7124
21222378	hypothetical protein SCO3974 [Streptomyces coelicolor A3(2)]	15.89	1	3	3	14	7.92627e+07	1.09258	0.946061	1.20183	31.8188	15.89	6	14	321	34.4976	5.47803
21225013	UvrA-like ABC transporter [Streptomyces coelicolor A3(2)]	4.52	1	1	1	1	12698468	1.09226	1.24076	0.880276	0	4.52	1	1	752	80.2363	7.13721
21220403	transferase [Streptomyces coelicolor A3(2)]	27.66	1	7	7	32	1.42225e+08	1.09182	1.06345	1.04798	103.203	27.66	13	32	329	33.9114	5.75732
21219991	transcription antitermination protein NusB [Streptomyces coelicolor A3(2)]	9.15	1	1	1	4	1.67154e+07	1.09146	1.37794	0.792063	16.0718	9.15	2	4	142	16.2124	5.09717
21225776	peptidyl-prolyl cis-trans isomerase [Streptomyces coelicolor A3(2)]	87.27	1	11	11	175	2.92689e+09	1.09134	1.31154	0.832693	623.965	87.27	22	175	165	17.8779	5.8335
21221663	4-hydroxyphenylpyruvic acid dioxygenase [Streptomyces coelicolor A3(2)]	13.21	1	3	3	16	3.45975e+07	1.09035	2.66309	0.422132	62.3966	13.21	6	16	371	40.1731	4.84326
21220097	translation initiation factor IF-3 [Streptomyces coelicolor A3(2)]	45.16	1	8	8	36	1.73376e+08	1.0898	0.943807	1.15255	123.397	45.16	16	36	217	24.1525	8.77783
21224083	30S ribosomal protein S15 [Streptomyces coelicolor A3(2)]	44.21	1	6	6	33	8.54302e+08	1.08928	1.06932	0.988889	111.073	44.21	11	33	95	10.784	11.1362
21223015	hypothetical protein SCO4633 [Streptomyces coelicolor A3(2)]	62.39	1	10	10	64	3.00115e+08	1.08914	1.10903	0.968713	210.94	62.39	20	64	218	22.2237	4.94482
32141191	oxidoreductase [Streptomyces coelicolor A3(2)]	40.58	1	16	16	66	8.20459e+07	1.0891	0.981002	1.07124	217.842	40.58	32	66	446	48.4389	8.49951
21222824	lyase [Streptomyces coelicolor A3(2)]	89.71	1	9	9	75	4.38611e+08	1.08883	1.07496	1.01103	251.315	89.71	18	75	136	15.0736	4.76709
21222630	cysteinyl-tRNA synthetase [Streptomyces coelicolor A3(2)]	22.02	1	12	12	37	7.80237e+07	1.08878	1.00396	1.01492	124.26	22.02	22	37	613	67.4975	9.5249
21221100	aminopeptidase N [Streptomyces coelicolor A3(2)]	69.43	1	39	39	292	6.92224e+08	1.08865	1.12334	0.960614	1072.19	69.43	78	292	857	94.3215	4.89404
21223496	hypothetical protein SCO5126 [Streptomyces coelicolor A3(2)]	31.19	1	6	6	24	6.3384e+07	1.08864	1.07254	1.01193	82.7778	31.19	12	24	295	31.4137	4.98291
21225567	dehydrogenase [Streptomyces coelicolor A3(2)]	1.85	1	1	1	2	624081810	1.08769	1.00059	1.087	0	1.85	1	2	325	35.5238	5.50342
21222306	hypothetical protein SCO3899 [Streptomyces coelicolor A3(2)]	67.78	1	23	23	173	6.33537e+08	1.08756	1.04005	1.03239	657.792	67.78	45	173	360	39.205	5.26221
21222479	phosphoribosylformylglycinamidine synthase subunit PurS [Streptomyces coelicolor A3(2)]	88.89	1	6	6	52	3.41844e+08	1.08755	0.95707	1.1242	181.004	88.89	12	52	90	9.76811	4.66553
21224376	hypothetical protein SCO6045 [Streptomyces coelicolor A3(2)]	1.6	1	1	1	1	1.14572e+07	1.08722	1.20691	0.900797	1.64499	1.6	1	1	438	46.4035	6.22705
21224003	hypothetical protein SCO5652 [Streptomyces coelicolor A3(2)]	53.33	1	5	5	29	1.22109e+08	1.08717	1.0264	1.07233	99.7082	53.33	10	29	135	14.7942	4.65283
21222090	purine phosphoribosyltransferase [Streptomyces coelicolor A3(2)]	49.09	1	6	6	26	1.14619e+08	1.08666	1.0402	1.03449	105.806	49.09	12	26	165	18.3133	4.79248
21222687	hypothetical protein SCO4294 [Streptomyces coelicolor A3(2)]	48.35	1	4	4	36	6.11773e+08	1.08645	0.928012	1.18089	131.754	48.35	8	36	91	9.56395	5.09717
32141159	integral membrane efflux protein [Streptomyces coelicolor A3(2)]	0.96	1	1	1	2	3.57311e+06	1.08638	1.47947	0.734273	6.13069	0.96	2	2	1041	107.987	4.90674
21219719	acyl-CoA dehydrogenase [Streptomyces coelicolor A3(2)]	1.47	1	1	1	1	2.31885e+07	1.08538	1.32315	0.820263	0	1.47	1	1	408	44.0773	5.64307
21221333	cytochrome P450 [Streptomyces coelicolor A3(2)]	5.39	1	2	2	4	1.18688e+07	1.08506	1.11811	0.970396	9.93866	5.39	4	4	408	44.6341	5.40186
21223829	glycine cleavage system aminomethyltransferase T [Streptomyces coelicolor A3(2)]	16.67	1	4	4	10	4.97934e+07	1.08504	1.10608	0.919104	27.7628	16.67	8	10	372	39.3761	5.10986
21224122	glutamate binding protein [Streptomyces coelicolor A3(2)]	61.87	1	18	18	127	2.63705e+08	1.0847	1.03157	1.05644	430.795	61.87	36	127	278	29.5359	5.89697
21221293	N-acetylglucosamine-6-phosphate deacetylase [Streptomyces coelicolor A3(2)]	14.67	1	2	2	8	3.14873e+07	1.08462	1.07505	0.9927	33.9707	14.67	4	8	259	28.0412	5.22412
21224960	transcriptional regulator [Streptomyces coelicolor A3(2)]	4.98	1	1	1	1	9.11612e+06	1.08433	0.90183	1.20232	0	4.98	1	1	301	33.0381	8.51416
21219516	superoxide dismutase [Streptomyces coelicolor A3(2)]	69.77	1	8	11	612	1.2124e+10	1.08432	1.13032	0.956002	2792.2	69.77	22	612	215	23.5848	5.51611
21221136	ATP /GTP-binding protein, partial [Streptomyces coelicolor A3(2)]	1.93	1	1	1	1	0	1.08423	0.975969	1.11088	0	1.93	1	1	779	86.4326	7.57666
21224569	allantoicase [Streptomyces coelicolor A3(2)]	25.27	1	7	7	34	5.81844e+07	1.084	1.06761	1.00865	105.919	25.27	14	34	376	41.1826	5.71924
21223097	50S ribosomal protein L6 [Streptomyces coelicolor A3(2)]	67.6	1	12	12	55	6.66237e+08	1.08397	1.06217	1.02871	145.996	67.6	24	55	179	19.1675	9.84717
21223580	3-phosphoshikimate 1-carboxyvinyltransferase [Streptomyces coelicolor A3(2)]	31.05	1	9	9	42	9.47498e+07	1.08396	1.10361	1.00457	147.562	31.05	18	42	438	45.8226	5.38916
21224955	glucose-6-phosphate isomerase [Streptomyces coelicolor A3(2)]	48	1	9	20	116	3.89635e+08	1.08394	1.06631	0.990697	389.215	48	37	116	550	60.3868	5.37646
21221565	phosphoenolpyruvate carboxylase [Streptomyces coelicolor A3(2)]	62.46	1	48	48	329	6.58922e+08	1.08383	1.0583	1.01947	1153.41	62.46	95	329	911	101.235	5.74463
21219980	guanylate kinase [Streptomyces coelicolor A3(2)]	5.08	1	1	1	6	1.73077e+07	1.08354	1.05507	1.05258	18.886	5.08	2	6	197	21.7203	5.31299
21219990	DNA-binding protein [Streptomyces coelicolor A3(2)]	70.66	1	9	9	38	1.65174e+08	1.08302	0.762077	1.42942	95.99	70.66	16	38	167	18.1676	6.58057
21224203	ferrochelatase [Streptomyces coelicolor A3(2)]	38.93	1	9	9	38	6.16589e+07	1.08265	1.01558	1.02079	131.993	38.93	17	38	375	40.5963	5.19873
21223093	50S ribosomal protein L24 [Streptomyces coelicolor A3(2)]	49.53	1	6	6	50	5.31029e+08	1.08248	1.13692	0.971814	175.261	49.53	12	50	107	11.5834	10.0522
21220485	DNA polymerase I [Streptomyces coelicolor A3(2)]	28.56	2	21	21	98	8.97174e+07	1.08247	0.988542	1.11909	334.087	28.56	41	98	907	98.8603	5.13525
21222240	branched-chain alpha-keto acid dehydrogenase E1 subunit beta [Streptomyces coelicolor A3(2)]	4.49	1	1	1	4	38341246	1.08233	1.0833	0.999057	13.4698	4.49	2	4	334	35.855	5.52881
21218755	alcohol dehydrogenase [Streptomyces coelicolor A3(2)]	42.06	1	10	10	97	1.14436e+09	1.0822	1.08243	1.01093	351.571	42.06	19	97	340	35.2873	6.17627
32141217	E1-alpha branched-chain alpha keto acid dehydrogenase, partial [Streptomyces coelicolor A3(2)]	15.46	1	4	4	14	1.65756e+07	1.0818	1.09022	1.02913	44.2733	15.46	8	14	388	42.3235	5.36377
21223081	30S ribosomal protein S10 [Streptomyces coelicolor A3(2)]	76.47	1	11	11	73	8.33985e+08	1.08164	1.02259	1.05935	233.886	76.47	22	73	102	11.5142	9.26123
21222238	molybdopterin-guanine dinucleotide biosynthesis protein [Streptomyces coelicolor A3(2)]	14.52	1	3	3	10	5.83468e+07	1.08158	1.1332	0.954412	33.1548	14.52	6	10	303	31.0994	6.96143
21219647	oxidoreductase, molybdopterin binding subunit [Streptomyces coelicolor A3(2)]	4.85	1	1	1	2	6.84556e+06	1.08098	1.10908	0.974624	3.01258	4.85	2	2	330	34.3496	5.85889
21220452	hydrolase [Streptomyces coelicolor A3(2)]	32.53	1	7	8	31	5.34588e+07	1.08087	0.969368	1.11365	97.3284	32.53	15	31	289	31.4	5.50342
21225894	endo-beta-N-acetylglucosaminidase [Streptomyces coelicolor A3(2)]	6.47	1	2	2	10	2.39127e+07	1.08077	1.0384	1.02824	30.5155	6.47	4	10	309	32.6634	5.97314
32141146	acetyltransferase [Streptomyces coelicolor A3(2)]	3.64	1	1	1	2	10786113	1.08077	1.06837	1.01157	6.27141	3.64	2	2	275	30.1552	6.91748
21220625	cytochrome B subunit [Streptomyces coelicolor A3(2)]	2.2	1	2	2	6	28439802	1.08048	0.964707	1.15035	12.0422	2.2	3	6	545	60.8467	7.85498
21223087	50S ribosomal protein L22 [Streptomyces coelicolor A3(2)]	61.6	1	6	6	56	1.0746e+09	1.0804	0.988441	1.09958	150.502	61.6	12	56	125	13.8552	10.2427
21225528	hypothetical protein SCO7251 [Streptomyces coelicolor A3(2)]	4.35	1	1	1	1	5.81466e+06	1.08034	0.942939	1.14567	0	4.35	1	1	345	37.1025	10.4624
21223331	cystathionine gamma-synthase [Streptomyces coelicolor A3(2)]	52.59	1	13	13	88	2.01113e+08	1.08013	0.987146	1.09961	335.731	52.59	25	88	386	40.7298	5.98584
21222066	hypothetical protein SCO3651 [Streptomyces coelicolor A3(2)]	15.27	1	2	2	8	5.95131e+07	1.08007	1.1902	0.938212	28.9381	15.27	4	8	262	28.8472	4.81787
21219359	hypothetical protein SCO0838 [Streptomyces coelicolor A3(2)]	6.38	1	1	1	2	1.37625e+07	1.07987	0.77949	1.3853	2.64814	6.38	2	2	141	15.9893	10.7993
21221588	hypothetical protein SCO3151 [Streptomyces coelicolor A3(2)]	28.04	1	6	6	19	3.25976e+07	1.07974	1.13047	0.980822	57.9398	28.04	11	19	296	31.3617	5.63037
21224770	transferase [Streptomyces coelicolor A3(2)]	38.95	1	9	9	39	5.52734e+07	1.0796	1.09164	0.980231	138.162	38.95	17	39	380	37.7928	4.84326
21222335	hypothetical protein SCO3929 [Streptomyces coelicolor A3(2)]	22.44	1	7	7	28	7.32161e+07	1.07955	1.0464	1.04065	106.739	22.44	12	28	450	50.0235	6.34131
21221449	acetyltransferase [Streptomyces coelicolor A3(2)]	8.38	1	2	2	6	1.58265e+07	1.07939	1.01208	1.02034	13.4421	8.38	4	6	191	20.6753	5.90967
21221082	hypothetical protein SCO2625 [Streptomyces coelicolor A3(2)]	6.54	1	2	2	6	1.82202e+07	1.0792	0.987587	1.15504	18.0951	6.54	4	6	413	44.6907	5.61768
21220844	aldo/keto reductase [Streptomyces coelicolor A3(2)]	35.5	1	8	8	32	6.89679e+07	1.07892	1.14444	0.947078	134.128	35.5	16	32	338	36.5138	5.08447
21225407	hypothetical protein SCO7125 [Streptomyces coelicolor A3(2)]	13.82	1	1	1	1	0	1.07851	1.08043	0.998183	0	13.82	1	1	246	25.7364	5.96045
21223201	bifunctional 5,10-methylene-tetrahydrofolate dehydrogenase/ 5,10-methylene-tetrahydrofolate cyclohydrolase [Streptomyces coelicolor A3(2)]	71.48	2	13	13	77	2.70307e+08	1.07807	1.15046	0.93822	265.939	71.48	26	77	284	29.7717	6.31592
21220209	homogentisate 1,2-dioxygenase [Streptomyces coelicolor A3(2)]	35.83	1	10	10	47	2.53403e+08	1.07798	1.08126	0.979853	188.098	35.83	20	47	441	48.388	5.8208
21221075	ATP-dependent Clp protease proteolytic subunit [Streptomyces coelicolor A3(2)]	42.37	1	11	11	71	6.30129e+08	1.07736	1.01638	1.07418	231.807	42.37	20	71	236	26.1161	5.04639
21224181	zinc protease [Streptomyces coelicolor A3(2)]	48	1	15	15	80	2.52285e+08	1.07723	1.07432	1.01065	291.155	48	30	80	450	49.0154	4.83057
21219007	hypothetical protein SCO0467 [Streptomyces coelicolor A3(2)]	12.15	1	1	2	10	49396872	1.07718	1.17302	0.917452	44.9868	12.15	4	10	247	26.7496	5.57959
21222620	hypothetical protein SCO4224 [Streptomyces coelicolor A3(2)]	4.04	1	1	1	2	1.90834e+06	1.07699	1.44722	0.744147	8.39531	4.04	2	2	421	44.7566	5.33838
21222481	phosphoribosylformylglycinamidine synthase II [Streptomyces coelicolor A3(2)]	58.91	1	31	31	176	2.11613e+08	1.07683	0.959044	1.12257	547.114	58.91	59	176	752	79.8022	4.80518
21221297	oxidoreductase [Streptomyces coelicolor A3(2)]	12.5	1	2	2	6	3.22058e+07	1.07679	1.09547	0.989453	28.2406	12.5	4	6	360	38.0808	5.47803
21222757	phosphoserine aminotransferase [Streptomyces coelicolor A3(2)]	44.08	1	12	12	64	2.42667e+08	1.0762	1.05387	1.02873	242.63	44.08	24	64	363	38.8048	5.85889
21225253	lipase [Streptomyces coelicolor A3(2)]	7.81	1	1	1	6	2.05215e+07	1.076	1.32095	0.814528	29.5883	7.81	2	6	269	28.905	6.1001
21223854	aspartyl/glutamyl-tRNA amidotransferase subunit C [Streptomyces coelicolor A3(2)]	90.82	1	4	4	45	2.05293e+08	1.07582	1.03859	1.09008	132.294	90.82	8	45	98	10.7726	4.77979
21222366	seryl-tRNA synthetase [Streptomyces coelicolor A3(2)]	43.29	1	17	17	72	2.03827e+08	1.07568	0.940676	1.10197	231.329	43.29	33	72	425	46.9692	5.59229
21221091	hypothetical protein SCO2634 [Streptomyces coelicolor A3(2)]	75	1	11	11	74	4.55893e+08	1.07534	1.13718	0.955488	238.882	75	21	74	216	23.9711	4.93213
32141165	integral membrane efflux protein, partial [Streptomyces coelicolor A3(2)]	1.88	1	1	1	6	5.86037e+06	1.07523	0.81922	1.328	22.6718	1.88	2	6	585	59.4471	9.72998
21220196	acyl-CoA dehydrogenase [Streptomyces coelicolor A3(2)]	2.61	1	1	1	2	8895406	1.07509	0.904806	1.18814	5.90795	2.61	2	2	383	40.9001	5.40186
21222026	peptide hydrolase [Streptomyces coelicolor A3(2)]	39.27	1	16	16	74	9.70004e+07	1.07508	1.06563	0.997275	240.029	39.27	31	74	606	65.6857	4.80518
21219530	mut-like protein [Streptomyces coelicolor A3(2)]	49.06	1	4	4	16	3.48415e+07	1.07495	1.07898	1.00622	62.6196	49.06	8	16	159	17.5267	4.56396
21223088	30S ribosomal protein S3 [Streptomyces coelicolor A3(2)]	40.43	1	15	15	86	8.14301e+08	1.07483	1.00184	1.05561	258.149	40.43	26	86	277	30.2549	10.4478
21218756	hypothetical protein SCO0200 [Streptomyces coelicolor A3(2)]	50.17	1	12	12	59	3.60457e+08	1.0748	1.07314	0.98422	185.655	50.17	22	59	301	32.1798	6.32861
21222239	branched-chain alpha-keto acid dehydrogenase E2 [Streptomyces coelicolor A3(2)]	7.33	1	3	3	8	2.30246e+07	1.07469	1.08407	1.03548	20.2856	7.33	6	8	491	50.5211	5.79541
21223920	50S ribosomal protein L28 [Streptomyces coelicolor A3(2)]	44.26	1	3	3	12	3.08272e+08	1.07444	1.03329	1.02632	37.3466	44.26	6	12	61	6.63437	11.561
21222647	hypothetical protein SCO4252 [Streptomyces coelicolor A3(2)]	39.6	1	8	8	71	6.61667e+08	1.07419	0.968738	1.18633	229.226	39.6	16	71	149	16.4703	4.91943
21220306	hypothetical protein SCO1817 [Streptomyces coelicolor A3(2)]	4.53	1	2	2	4	1.57084e+07	1.07352	1.07214	1.00124	9.91475	4.53	4	4	464	49.447	5.12256
21223340	hypothetical protein SCO4967 [Streptomyces coelicolor A3(2)]	47.1	1	11	11	54	1.10307e+08	1.07348	1.0777	0.96288	168.152	47.1	22	54	293	33.1433	4.85596
21224890	esterase [Streptomyces coelicolor A3(2)]	2.31	1	1	2	5	1.00666e+07	1.07335	0.904655	1.18642	15.0205	2.31	3	5	735	72.5446	4.64014
21225640	hypothetical protein SCO7366 [Streptomyces coelicolor A3(2)]	14.51	1	2	2	12	3.39066e+07	1.07321	1.20926	0.906081	46.6177	14.51	4	12	255	27.6016	4.62744
21219291	hypothetical protein SCO0767 [Streptomyces coelicolor A3(2)]	3.71	2	1	2	3	1.79253e+07	1.07316	1.40417	0.76423	11.9576	3.71	3	3	835	89.6941	5.5542
21225158	hypothetical protein SCO6867 [Streptomyces coelicolor A3(2)]	3.95	1	1	1	1	13504334	1.07275	0.922971	1.16223	2.20735	3.95	1	1	152	17.1508	11.2388
21223099	30S ribosomal protein S5 [Streptomyces coelicolor A3(2)]	56.72	1	14	14	90	8.09183e+08	1.07233	1.01345	1.03512	284.156	56.72	27	90	201	20.4872	10.1987
21223857	aspartyl/glutamyl-tRNA amidotransferase subunit B [Streptomyces coelicolor A3(2)]	48.41	1	20	20	111	2.26017e+08	1.07183	0.956625	1.13166	349.644	48.41	36	111	504	54.4517	5.2876
21219811	hypothetical protein SCO1304 [Streptomyces coelicolor A3(2)]	20	1	3	3	20	6.83991e+07	1.07165	1.06662	0.985001	43.2458	20	6	20	135	14.5194	5.12256
21220340	cob(I)yrinic acid a,c-diamide adenosyltransferase [Streptomyces coelicolor A3(2)]	12.06	1	2	2	10	2.48578e+07	1.07157	0.937027	1.19921	27.4096	12.06	4	10	199	22.2232	7.62061
21222233	quinone oxidoreductase [Streptomyces coelicolor A3(2)]	57.06	1	11	11	72	3.24343e+08	1.07149	1.06679	1.01967	229.242	57.06	20	72	326	33.7566	5.52881
21221838	hypothetical protein SCO3411 [Streptomyces coelicolor A3(2)]	2.31	1	1	1	2	6.20422e+06	1.07132	0.908793	1.17879	2.89828	2.31	2	2	303	33.7284	7.47412
21224011	peptidase [Streptomyces coelicolor A3(2)]	1.55	1	1	1	3	217041154	1.07131	0.937749	1.14238	5.20192	1.55	2	3	386	40.9071	7.29834
21223264	thymidine phosphorylase [Streptomyces coelicolor A3(2)]	18.74	1	4	4	22	2.97571e+07	1.07096	1.19592	0.929727	95.2945	18.74	7	22	427	44.1707	5.0083
21223629	dehydrogenase [Streptomyces coelicolor A3(2)]	45.79	1	10	10	71	154382850	1.07071	1.13255	1.00967	263.415	45.79	20	71	321	33.9736	5.89697
21221092	aminopeptidase [Streptomyces coelicolor A3(2)]	41.3	1	27	27	122	1.07612e+08	1.0707	1.07711	0.983691	380.581	41.3	51	122	833	92.121	5.0083
21224653	hypothetical protein SCO6340 [Streptomyces coelicolor A3(2)]	29.38	1	3	3	10	5.23227e+07	1.0703	1.1528	0.920783	32.1871	29.38	5	10	211	23.0739	5.94775
21225319	argininosuccinate synthase [Streptomyces coelicolor A3(2)]	12.27	1	4	4	23	3.06581e+07	1.06997	0.969134	1.11889	77.932	12.27	8	23	481	52.237	4.97021
21222203	methionyl-tRNA synthetase [Streptomyces coelicolor A3(2)]	64.13	1	24	24	124	2.95064e+08	1.0697	1.06915	1.00896	448.52	64.13	46	124	538	59.7039	5.18604
21222857	phosphoglycerate mutase [Streptomyces coelicolor A3(2)]	13.3	1	3	3	12	3.19288e+07	1.06926	0.817649	1.30767	37.387	13.3	6	12	233	25.9835	9.15869
21219995	3-dehydroquinate synthase [Streptomyces coelicolor A3(2)]	29.48	1	10	10	50	1.10331e+08	1.06919	1.02742	1.01448	158.319	29.48	20	50	363	38.1461	5.8335
21223186	succinyl-CoA synthetase subunit beta [Streptomyces coelicolor A3(2)]	74.37	1	32	32	570	3.50998e+09	1.06909	0.950299	1.12352	2000.19	74.37	64	570	394	41.5768	4.89404
21224072	hypothetical protein SCO5725 [Streptomyces coelicolor A3(2)]	80.58	1	7	7	38	1.3219e+08	1.069	0.987963	1.04146	139.832	80.58	14	38	103	11.4927	5.22412
21223855	aspartyl/glutamyl-tRNA amidotransferase subunit A [Streptomyces coelicolor A3(2)]	34.81	1	13	13	75	2.06259e+08	1.06894	0.906361	1.17453	239.496	34.81	26	75	497	52.2375	4.94482
21221090	superoxide dismutase [Streptomyces coelicolor A3(2)]	64.32	1	7	10	552	1.22603e+10	1.06862	1.03614	1.0357	2455.09	64.32	20	552	213	23.5127	5.36377
21221548	transcriptional-repair coupling factor [Streptomyces coelicolor A3(2)]	9.97	1	10	10	34	3.18898e+07	1.06841	1.01589	1.03183	100.873	9.97	20	34	1184	129.415	5.37646
21221682	acyl carrier protein [Streptomyces coelicolor A3(2)]	30.86	1	1	1	6	9.3823e+07	1.06812	1.18136	0.904106	22.6744	30.86	2	6	81	8.40935	4.11963
21219445	hypothetical protein SCO0926 [Streptomyces coelicolor A3(2)]	7.36	1	2	2	6	1.6864e+07	1.06801	1.13359	0.929459	21.1763	7.36	4	6	299	31.3968	4.94482
21222356	hypothetical protein SCO3951 [Streptomyces coelicolor A3(2)]	8.13	1	2	2	4	2.50883e+07	1.06774	1.05024	1.01662	10.1686	8.13	4	4	320	35.27	6.20166
21223875	hypothetical protein SCO5519 [Streptomyces coelicolor A3(2)]	9.74	1	3	3	11	2.95816e+07	1.06766	0.822073	1.25507	23.7686	9.74	4	11	308	34.4667	6.07471
21223191	phosphoribosylglycinamide formyltransferase [Streptomyces coelicolor A3(2)]	3.72	1	1	1	3	9.89121e+06	1.06755	1.0015	1.0659	7.22345	3.72	2	3	215	23.1341	5.89697
21223997	solute binding lipoprotein [Streptomyces coelicolor A3(2)]	2.14	1	1	1	2	4.14804e+06	1.06729	0.853021	1.25113	3.1272	2.14	2	2	373	40.0122	5.5542
21225738	phenylacetic acid degradation protein PaaI [Streptomyces coelicolor A3(2)]	15.88	1	3	3	9	2.69941e+07	1.06727	1.10394	0.94445	27.6576	15.88	5	9	170	18.198	5.64307
21222381	protease [Streptomyces coelicolor A3(2)]	15.99	1	6	6	40	1.05166e+08	1.06712	0.715276	1.43914	142.859	15.99	12	40	519	50.2969	4.85596
21222939	ubiquinone/menaquinone biosynthesis methyltransferase [Streptomyces coelicolor A3(2)]	37.23	1	6	6	28	8.57793e+07	1.0671	0.785761	1.29534	111.152	37.23	11	28	231	25.5211	9.78857
21224934	hypothetical protein SCO6637 [Streptomyces coelicolor A3(2)]	6.29	1	1	1	1	0	1.06698	0.9562	1.11581	0	6.29	1	1	350	38.3699	6.21436
21224782	hypothetical protein SCO6478 [Streptomyces coelicolor A3(2)]	25.76	1	2	2	10	4.01112e+07	1.06688	1.22204	0.873343	36.579	25.76	4	10	132	13.8811	4.90674
21221411	SsrA-binding protein [Streptomyces coelicolor A3(2)]	13.84	1	3	3	11	3.39936e+07	1.06671	0.807792	1.28496	11.5594	13.84	5	11	159	18.3699	10.0962
21223338	transcription elongation factor GreA [Streptomyces coelicolor A3(2)]	53.94	1	7	7	27	116542699	1.06636	1.10663	0.972318	79.8634	53.94	13	27	165	17.8319	4.66553
32141158	quinolinate synthetase [Streptomyces coelicolor A3(2)]	2.54	1	1	1	2	0	1.06634	1.04589	1.01951	6.2004	2.54	2	2	394	43.0976	5.07178
21224185	phosphocarrier protein HPr [Streptomyces coelicolor A3(2)]	56.99	1	2	2	18	1.66532e+09	1.06613	0.989766	1.06957	70.3525	56.99	3	18	93	9.38492	4.61475
21224076	hypothetical protein SCO5729 [Streptomyces coelicolor A3(2)]	0.94	1	1	1	2	4.19899e+06	1.06606	1.15499	0.922969	5.5053	0.94	2	2	745	80.9289	5.13525
21220642	hypothetical protein SCO2168 [Streptomyces coelicolor A3(2)]	72.59	1	14	14	77	1.46193e+08	1.06603	1.1626	0.888236	311.265	72.59	27	77	259	28.4176	5.37646
21223611	anti-sigma factor [Streptomyces coelicolor A3(2)]	49.64	1	4	4	19	4.36414e+07	1.06588	1.7324	0.644106	66.1724	49.64	8	19	137	14.2963	4.60205
21221562	50S ribosomal protein L25/general stress protein Ctc [Streptomyces coelicolor A3(2)]	25.25	1	6	6	42	5.20766e+08	1.06573	0.990282	1.07049	127.808	25.25	12	42	198	20.816	4.80518
21223098	50S ribosomal protein L18 [Streptomyces coelicolor A3(2)]	74.02	1	11	11	41	7.37195e+08	1.06571	0.928204	1.13435	113.182	74.02	19	41	127	13.5704	10.6089
21224005	ABC transporter ATP-binding protein [Streptomyces coelicolor A3(2)]	2.33	1	1	1	1	5.63206e+06	1.0657	1.0282	1.03643	0	2.33	1	1	258	27.7457	10.2427
21223462	cyclase [Streptomyces coelicolor A3(2)]	40.4	1	10	10	50	1.32265e+08	1.06554	1.13847	0.914123	170.639	40.4	20	50	297	31.9095	5.47803
21219043	NAD synthetase [Streptomyces coelicolor A3(2)]	35.87	1	6	6	23	1.26999e+08	1.06531	1.19256	0.850913	72.0813	35.87	11	23	276	29.7365	5.43994
21221189	type II citrate synthase [Streptomyces coelicolor A3(2)]	62.7	1	22	22	290	2.90194e+09	1.0653	1.03298	1.02443	1058.68	62.7	44	290	429	47.7143	6.04932
21220320	oxidoreductase [Streptomyces coelicolor A3(2)]	29.08	1	6	6	31	1.64777e+08	1.06486	0.99495	1.0373	90.5806	29.08	12	31	251	25.6795	5.35107
21223888	hypothetical protein SCO5533 [Streptomyces coelicolor A3(2)]	31.89	1	5	5	23	6.70264e+07	1.06441	1.03642	0.988275	76.1013	31.89	9	23	185	19.9479	5.03369
21224001	hypothetical protein SCO5650 [Streptomyces coelicolor A3(2)]	22.65	1	3	3	21	3.36651e+08	1.0644	0.975264	1.13512	69.2084	22.65	6	21	234	23.5896	4.67822
21222718	hypothetical protein SCO4326 [Streptomyces coelicolor A3(2)]	34.4	2	7	7	29	1.09222e+08	1.06417	1.08268	1.01279	90.7596	34.4	13	29	282	30.0352	4.84326
21223123	4'-phosphopantetheinyl transferase [Streptomyces coelicolor A3(2)]	5.69	1	1	1	2	3.183e+07	1.064	1.11628	0.953128	4.41218	5.69	2	2	123	12.5588	5.90967
21222927	hypothetical protein SCO4543 [Streptomyces coelicolor A3(2)]	4.24	1	2	2	3	6.96934e+07	1.0639	0.914456	1.16337	5.89152	4.24	2	3	283	31.7796	7.43018
21223450	hypothetical protein SCO5079 [Streptomyces coelicolor A3(2)]	58.84	1	14	14	353	2.88054e+09	1.0638	1.09146	0.989648	1432.86	58.84	26	353	294	32.0822	6.03662
21220075	acetylornithine aminotransferase [Streptomyces coelicolor A3(2)]	13.93	1	2	2	4	1.22355e+07	1.06372	1.18846	0.895001	21.6155	13.93	4	4	402	41.5345	5.38916
21221995	ion-transporting ATPase [Streptomyces coelicolor A3(2)]	10.15	1	2	2	12	1.72478e+07	1.06287	0.898067	1.13437	29.1638	10.15	4	12	325	34.7277	6.96143
21224435	acyl-CoA dehydrogenase [Streptomyces coelicolor A3(2)]	1.08	1	1	1	1	5.2098e+06	1.06274	1.06237	1.0003	2.04778	1.08	1	1	557	58.8391	6.7124
21219982	orotidine 5'-phosphate decarboxylase [Streptomyces coelicolor A3(2)]	15.83	1	3	3	9	4.19182e+07	1.06224	1.01465	1.06036	29.9699	15.83	6	9	278	28.7728	5.49072
32141181	agmatinase, partial [Streptomyces coelicolor A3(2)]	21.74	1	6	6	24	9.50538e+07	1.06222	1.09667	0.990815	87.7241	21.74	12	24	322	34.2813	5.32568
32141198	lysyl-tRNA synthetase [Streptomyces coelicolor A3(2)]	28.28	1	15	15	67	1.08776e+08	1.06212	1.00635	1.03754	190.982	28.28	30	67	580	63.5121	5.8208
21224425	lipoprotein [Streptomyces coelicolor A3(2)]	37.87	1	12	12	55	1.03694e+08	1.06196	1.13048	0.964083	177.955	37.87	23	55	367	38.4601	5.31299
21223086	30S ribosomal protein S19 [Streptomyces coelicolor A3(2)]	56.99	1	9	9	61	6.68441e+08	1.06143	1.02688	1.0284	129.89	56.99	18	61	93	10.5667	10.814
21223693	DNA methylase [Streptomyces coelicolor A3(2)]	5.92	2	6	6	18	1.71711e+07	1.0612	0.97159	1.09786	57.4901	5.92	12	18	1200	135.733	6.07471
21224536	hydroxydechloroatrazine ethylaminohydrolase [Streptomyces coelicolor A3(2)]	3.01	1	1	1	2	838535	1.06099	0.998037	1.06303	4.93687	3.01	2	2	465	48.8174	6.02393
21219603	oxidoreductase [Streptomyces coelicolor A3(2)]	75	1	14	14	89	1.05963e+09	1.06093	1.00472	1.03212	329.575	75	28	89	272	28.5654	5.8208
21225056	polyprenyl synthatase [Streptomyces coelicolor A3(2)]	1.85	1	1	1	4	1.86342e+07	1.0609	1.05462	1.00591	9.21349	1.85	2	4	378	40.0865	5.30029
21222489	phosphoribosylaminoimidazole synthetase [Streptomyces coelicolor A3(2)]	30.99	1	8	8	47	1.10533e+08	1.06075	1.08639	1.00861	146.365	30.99	16	47	355	36.8107	4.83057
21220045	aminotransferase [Streptomyces coelicolor A3(2)]	64.84	1	12	12	70	2.35011e+08	1.06056	0.9442	1.12697	246.362	64.84	24	70	273	28.958	6.23975
21220837	thiol-specific antioxidant protein [Streptomyces coelicolor A3(2)]	71.05	1	11	11	57	4.7241e+08	1.06045	1.06493	0.99572	211.926	71.05	21	57	152	16.9735	4.80518
21220965	glycyl-tRNA synthetase [Streptomyces coelicolor A3(2)]	50	1	18	18	97	2.2501e+08	1.06043	0.96502	1.07215	326.672	50	36	97	460	52.4069	5.61768
21219373	aldolase [Streptomyces coelicolor A3(2)]	81.43	1	10	10	61	2.96812e+08	1.0603	1.08761	0.922306	252.136	81.43	19	61	210	21.0873	6.55127
21221073	valyl-tRNA synthetase [Streptomyces coelicolor A3(2)]	37.19	1	29	29	143	1.44068e+08	1.0602	0.9283	1.15226	489.833	37.19	52	143	874	97.5061	5.33838
21224719	hydrolase [Streptomyces coelicolor A3(2)]	25.71	2	4	4	10	37761105	1.06019	1.10355	0.951286	36.9311	25.71	6	10	280	31.7407	5.65576
21220671	glutamine synthetase [Streptomyces coelicolor A3(2)]	69.72	1	25	25	283	1.87952e+09	1.06002	1.01099	1.0402	869.752	69.72	49	283	469	52.5352	5.2876
21222885	dehydratase [Streptomyces coelicolor A3(2)]	2.06	1	1	1	1	77254.6	1.06001	1.03884	1.02033	1.64671	2.06	1	1	291	30.8352	10.1401
21220548	hypothetical protein SCO2067 [Streptomyces coelicolor A3(2)]	40.98	1	10	10	39	8.60872e+07	1.05989	0.97577	1.10605	110.604	40.98	20	39	266	28.5945	7.35693
21218726	hypothetical protein SCO0169 [Streptomyces coelicolor A3(2)]	4.61	1	1	1	4	2.08148e+07	1.05985	0.736888	1.43822	11.2934	4.61	2	4	217	23.1483	5.04639
21220307	tyrosyl-tRNA synthetase [Streptomyces coelicolor A3(2)]	35.07	1	12	12	50	1.00134e+08	1.05932	0.909428	1.15448	194.809	35.07	23	50	422	46.2957	5.5415
21220077	N-acetyl-gamma-glutamyl-phosphate reductase [Streptomyces coelicolor A3(2)]	13.74	1	2	2	8	2.8739e+07	1.05919	1.09952	0.959574	22.9304	13.74	4	8	342	34.5938	5.70654
21218827	hypothetical protein SCO0277 [Streptomyces coelicolor A3(2)]	18.47	1	3	3	20	2.70289e+07	1.05914	1.1119	0.929992	68.9488	18.47	6	20	222	24.6053	5.30029
21222670	tellurium resistance protein [Streptomyces coelicolor A3(2)]	92.67	1	10	12	293	4.66187e+09	1.05891	1.05743	1.00197	1144.45	92.67	23	293	191	20.332	4.65283
21221374	4-hydroxyphenylpyruvate dioxygenase [Streptomyces coelicolor A3(2)]	58.53	1	16	16	111	5.05987e+08	1.05879	1.11908	0.957764	395.699	58.53	31	111	381	41.8499	5.56689
21223041	30S ribosomal protein S7 [Streptomyces coelicolor A3(2)]	54.49	1	9	9	58	9.34102e+08	1.0585	1.06539	0.951041	165.727	54.49	18	58	156	17.4205	10.4038
21220615	hypothetical protein SCO2138 [Streptomyces coelicolor A3(2)]	59.49	1	3	3	12	4.24815e+07	1.05842	1.24051	0.861488	50.7137	59.49	6	12	79	8.87339	4.93213
21221693	MutT-like protein [Streptomyces coelicolor A3(2)]	6.98	1	1	1	3	1.90552e+06	1.05827	1.20934	0.875048	2.02382	6.98	2	3	129	14.0991	5.04639
21220444	mycothiol-dependent maleylpyruvate isomerase [Streptomyces coelicolor A3(2)]	40.79	1	6	6	28	6.92589e+07	1.05763	1.14271	0.901804	59.7182	40.79	12	28	228	24.6554	5.09717
21220953	dehydrogenase [Streptomyces coelicolor A3(2)]	11.76	1	3	3	15	1.49412e+07	1.05737	1.01032	1.03815	43.7247	11.76	6	15	255	25.6543	6.04932
21223463	actinorhodin polyketide dimerase [Streptomyces coelicolor A3(2)]	38.98	1	5	5	18	5.83375e+07	1.05731	1.08386	0.980771	59.9207	38.98	10	18	177	18.3812	6.62451
21219366	hypothetical protein SCO0845 [Streptomyces coelicolor A3(2)]	6.82	1	1	1	2	305683	1.05723	1.06865	0.989276	3.86621	6.82	1	2	88	9.88821	10.7993
21224958	transaldolase [Streptomyces coelicolor A3(2)]	60.89	1	16	17	90	5.74108e+08	1.05711	0.979473	1.05181	272.266	60.89	32	90	381	40.3828	4.79248
21219965	transcriptional regulator [Streptomyces coelicolor A3(2)]	7.78	1	1	1	2	12458260	1.05691	1.00758	1.04891	6.2417	7.78	2	2	360	38.6068	5.51611
21222452	antibiotic binding protein [Streptomyces coelicolor A3(2)]	6.27	1	3	3	11	3.82371e+07	1.05685	1.08097	0.987075	50.5263	6.27	5	11	782	82.7181	5.61768
21223030	50S ribosomal protein L11 [Streptomyces coelicolor A3(2)]	36.81	1	6	6	36	2.61376e+08	1.05678	0.866809	1.20553	91.4258	36.81	12	36	144	15.3842	9.51025
21220633	cytochrome c oxidase subunit II [Streptomyces coelicolor A3(2)]	17.24	1	5	5	30	6.85512e+07	1.0567	1.03739	1.04396	85.7922	17.24	10	30	319	35.4241	8.07471
21223100	50S ribosomal protein L30 [Streptomyces coelicolor A3(2)]	50	1	4	4	25	4.03935e+08	1.05645	1.00279	1.05561	45.9858	50	8	25	60	6.88368	9.70068
21222067	hypothetical protein SCO3652 [Streptomyces coelicolor A3(2)]	5.48	1	1	1	6	2.41612e+07	1.05625	0.907794	1.17475	25.2699	5.48	2	6	310	31.6808	4.88135
21220040	hypothetical protein SCO1540 [Streptomyces coelicolor A3(2)]	5.33	1	1	1	2	3.81927e+06	1.05611	0.899903	1.17353	2.30148	5.33	2	2	150	16.42	10.6382
21220422	transaldolase [Streptomyces coelicolor A3(2)]	72.04	1	26	27	274	2.49053e+09	1.05608	0.999154	1.04518	884.959	72.04	54	274	372	40.563	5.04639
21221570	trans-aconitate 2-methyltransferase [Streptomyces coelicolor A3(2)]	18.81	1	4	4	16	6.4309e+07	1.05593	1.04662	1.00746	48.2538	18.81	7	16	303	32.039	6.29053
21221623	5'-methylthioadenosine phosphorylase [Streptomyces coelicolor A3(2)]	20.36	1	3	3	16	4.68097e+07	1.05548	1.11937	0.952598	56.0654	20.36	6	16	280	29.7361	6.34131
32141268	gamma-aminobutyraldehyde dehydrogenase [Streptomyces coelicolor A3(2)]	19.96	1	9	9	32	4.74958e+07	1.0553	1.02036	1.04261	103.671	19.96	18	32	511	54.3202	5.5415
32141266	delta-1-pyrroline-5-carboxylate dehydrogenase, partial [Streptomyces coelicolor A3(2)]	65.75	1	31	31	454	3.34521e+09	1.05502	1.01509	1.03639	1444.82	65.75	61	454	546	59.3254	5.30029
21226092	hypothetical protein SCO0004 [Streptomyces coelicolor A3(2)]	6.98	1	1	1	1	0	1.05485	1.11775	0.943681	0	6.98	1	1	315	33.7063	9.26123
21223866	dehydrogenase [Streptomyces coelicolor A3(2)]	15.02	1	4	4	16	4.18065e+07	1.05464	1.06689	1.00928	50.6697	15.02	8	16	313	33.3677	5.80811
21221919	polyguluronate lyase [Streptomyces coelicolor A3(2)]	8.88	1	2	2	8	6788039	1.05459	1.27039	0.812185	22.2322	8.88	4	8	259	27.3646	9.27588
21223576	monophosphatase [Streptomyces coelicolor A3(2)]	24.44	1	4	4	12	2.1241e+07	1.0545	1.17195	0.911311	43.2299	24.44	8	12	266	29.0654	5.2749
21220480	30S ribosomal protein S1 [Streptomyces coelicolor A3(2)]	56.18	1	27	27	208	1.01672e+09	1.05437	1.01401	1.01558	649.017	56.18	54	208	502	55.001	4.64014
21221358	hypothetical protein SCO2911 [Streptomyces coelicolor A3(2)]	50	1	5	5	44	3.87343e+08	1.05429	1.05597	0.983732	133.316	50	10	44	92	10.0712	4.84326
21222313	30S ribosomal protein S6 [Streptomyces coelicolor A3(2)]	76.04	1	9	9	59	7.30637e+08	1.05425	1.07534	0.973721	110.588	76.04	18	59	96	11.1699	6.56592
21223561	hypothetical protein SCO5192 [Streptomyces coelicolor A3(2)]	16.2	1	4	4	14	2.14483e+08	1.054	0.924181	1.15426	54.4275	16.2	8	14	469	51.2743	4.69092
21223415	fumarate hydratase [Streptomyces coelicolor A3(2)]	71.37	1	23	23	138	2.61042e+08	1.05389	1.025	1.04838	512.342	71.37	44	138	461	49.0384	5.45264
21222031	aspartate kinase [Streptomyces coelicolor A3(2)]	40.24	1	16	16	75	6.24394e+08	1.05355	1.04225	0.994456	216.042	40.24	29	75	425	44.7521	5.23682
21220985	hypothetical protein SCO2524 [Streptomyces coelicolor A3(2)]	8.14	2	4	5	12	2.09241e+07	1.05353	1.18704	0.840067	39.578	8.14	8	12	614	68.6605	5.31299
21220304	enoyl-ACP reductase [Streptomyces coelicolor A3(2)]	38.43	1	6	6	52	6.22145e+08	1.05294	1.12799	0.935243	182.569	38.43	12	52	255	27.1359	5.60498
21221430	hypothetical protein SCO2986 [Streptomyces coelicolor A3(2)]	53.28	1	6	6	38	2.54822e+08	1.05271	1.0911	0.981974	156.286	53.28	12	38	137	13.92	4.60205
21221759	hypothetical protein SCO3328 [Streptomyces coelicolor A3(2)]	15.71	1	1	1	4	9.46682e+07	1.05251	0.974883	1.07958	15.6848	15.71	2	4	70	7.79307	8.68994
21224180	DNA topoisomerase IV subunit A [Streptomyces coelicolor A3(2)]	6.6	1	4	5	19	5.95281e+07	1.05228	0.524799	1.96586	42.7906	6.6	9	19	818	88.5863	5.64307
21222282	DNA gyrase subunit B [Streptomyces coelicolor A3(2)]	34.99	1	17	19	101	1.96511e+08	1.0519	0.988998	1.05427	350.369	34.99	37	101	686	75.4182	5.41455
21223468	short-chain oxidoreductase [Streptomyces coelicolor A3(2)]	5.8	1	1	1	4	9.29055e+06	1.05165	1.06673	0.985823	16.3241	5.8	2	4	276	28.7765	5.0083
21221992	epoxide hydrolase [Streptomyces coelicolor A3(2)]	8.47	1	2	2	6	2.50369e+07	1.05164	1.0083	0.968858	19.7201	8.47	4	6	354	38.099	5.09717
21224853	oxidoreductase [Streptomyces coelicolor A3(2)]	57.4	2	11	11	59	1.92974e+08	1.05161	0.995938	1.08181	184.63	57.4	21	59	277	30.2086	5.24951
21219248	hydrolase [Streptomyces coelicolor A3(2)]	17.89	1	4	4	13	3.10346e+07	1.05155	1.11223	0.917178	32.8673	17.89	7	13	246	26.5684	5.08447
21222549	acetyltransferase [Streptomyces coelicolor A3(2)]	47.57	1	10	10	42	1.08008e+08	1.05148	1.0454	0.969823	135.142	47.57	20	42	309	33.4984	6.07471
21223853	hypothetical protein SCO5497 [Streptomyces coelicolor A3(2)]	20.12	1	3	3	14	8.50117e+07	1.05145	1.18366	0.895116	44.8818	20.12	6	14	164	17.4119	4.77979
21220008	hypothetical protein SCO1507 [Streptomyces coelicolor A3(2)]	6.25	1	1	1	4	4.01283e+07	1.05116	0.786747	1.33602	16.6661	6.25	2	4	240	26.3105	8.646
21222648	hypothetical protein SCO4253 [Streptomyces coelicolor A3(2)]	42.32	1	16	16	182	1.2748e+09	1.05116	0.97663	1.07495	584.192	42.32	31	182	534	56.9238	5.13525
21220591	bacterioferritin [Streptomyces coelicolor A3(2)]	16.77	1	3	3	11	4.71054e+07	1.05091	1.03927	1.00859	26.7251	16.77	6	11	167	19.2078	4.85596
21223823	hypothetical protein SCO5465 [Streptomyces coelicolor A3(2)]	83.18	1	13	13	81	4.0419e+08	1.05032	0.994633	1.05765	268.48	83.18	26	81	220	23.0679	5.13525
21220442	fructokinase [Streptomyces coelicolor A3(2)]	35.1	1	7	7	33	3.32787e+07	1.04962	1.09055	0.948636	119.102	35.1	14	33	302	30.7758	4.80518
21220031	threonyl-tRNA synthetase [Streptomyces coelicolor A3(2)]	42.55	1	28	28	168	2.2013e+08	1.04961	0.948654	1.0898	556.091	42.55	55	168	658	74.5186	5.47803
21222707	hypothetical protein SCO4314 [Streptomyces coelicolor A3(2)]	43.17	1	9	9	37	5.08227e+07	1.04952	1.10777	0.943384	97.3157	43.17	18	37	227	24.3944	4.86865
21223567	hypothetical protein SCO5198 [Streptomyces coelicolor A3(2)]	26.9	1	3	3	12	6.4406e+07	1.04945	1.15425	0.907125	51.9324	26.9	6	12	171	18.7645	5.37646
21220708	lyase [Streptomyces coelicolor A3(2)]	62.84	2	10	10	61	2.54441e+08	1.04931	1.16114	0.897002	166.459	62.84	19	61	148	16.4582	5.05908
21225844	hypothetical protein SCO7580 [Streptomyces coelicolor A3(2)]	45.76	1	8	8	44	1.3839e+08	1.04896	1.14066	0.850732	134.843	45.76	16	44	271	30.1571	4.81787
21219710	oxidoreductase [Streptomyces coelicolor A3(2)]	3.07	1	1	1	1	6997498	1.04843	0.948022	1.10586	2.31622	3.07	1	1	326	33.9046	6.37939
21219895	phosphoenolpyruvate-protein phosphotransferase [Streptomyces coelicolor A3(2)]	56.47	1	22	22	104	2.09241e+08	1.04837	1.04728	0.996397	371.382	56.47	42	104	556	57.2366	4.79248
21223094	50S ribosomal protein L5 [Streptomyces coelicolor A3(2)]	71.89	1	13	13	101	674505598	1.04794	1.01279	1.07078	326.606	71.89	26	101	185	20.84	9.68604
21221466	S-adenosyl-L-homocysteine hydrolase [Streptomyces coelicolor A3(2)]	45.98	1	25	25	179	6.12335e+08	1.04787	1.02714	1.04116	497.799	45.98	50	179	485	52.9067	5.2749
21225531	myo-inositol dehydrogenase [Streptomyces coelicolor A3(2)]	3.22	1	1	1	2	1.05726e+07	1.04753	1.16856	0.896388	3.97497	3.22	2	2	342	35.9973	5.66846
21220606	hypothetical protein SCO2129 [Streptomyces coelicolor A3(2)]	53.47	1	5	5	28	1.51759e+08	1.04728	1.06006	0.952981	88.0156	53.47	10	28	144	15.8852	6.01123
21219899	mutT-like protein [Streptomyces coelicolor A3(2)]	20.29	1	2	2	6	1.9656e+07	1.04697	1.09103	0.959572	13.5797	20.29	4	6	138	15.0989	5.5415
32141235	formyltetrahydrofolate deformylase [Streptomyces coelicolor A3(2)]	8.08	1	3	3	6	4.67158e+07	1.04648	0.892516	1.22728	13.9552	8.08	5	6	297	32.8098	6.46826
21223404	hypothetical protein SCO5031 [Streptomyces coelicolor A3(2)]	26.4	1	5	5	34	2.39613e+08	1.04637	0.798057	1.288	108.412	26.4	10	34	178	18.9897	5.18604
21221637	RNA polymerase principal sigma factor [Streptomyces coelicolor A3(2)]	4.22	1	1	1	4	1.30174e+07	1.04626	0.799183	1.30911	15.5638	4.22	2	4	332	37.1323	5.26221
21223025	UDP-N-acetylenolpyruvoylglucosamine reductase [Streptomyces coelicolor A3(2)]	13.58	1	3	3	14	7.90661e+07	1.04622	0.99311	1.07704	57.111	13.58	6	14	383	40.3399	5.90967
21222444	uracil phosphoribosyltransferase [Streptomyces coelicolor A3(2)]	57.48	1	9	9	42	2.10731e+08	1.04601	1.02461	1.00869	163.205	57.48	18	42	214	23.2532	5.31299
21219492	6-phosphogluconate dehydrogenase [Streptomyces coelicolor A3(2)]	44.89	1	14	14	83	2.87301e+08	1.04594	1.00629	1.02932	322.138	44.89	26	83	479	51.3968	5.22412
21223031	50S ribosomal protein L1 [Streptomyces coelicolor A3(2)]	70.54	1	17	17	114	4.38697e+08	1.04586	0.675378	1.49631	299.204	70.54	33	114	241	25.7477	9.5249
21225632	hypothetical protein SCO7358 [Streptomyces coelicolor A3(2)]	1.8	1	1	1	4	10663702	1.04506	0.896243	1.16599	12.0206	1.8	2	4	500	54.843	8.60205
21224028	aldehyde dehydrogenase [Streptomyces coelicolor A3(2)]	19.54	1	8	8	37	8.35652e+07	1.04473	1.04455	1.00252	115.229	19.54	15	37	481	50.63	5.14795
21223053	hypothetical protein SCO4672 [Streptomyces coelicolor A3(2)]	5.43	1	1	1	1	0	1.04472	1.10001	0.949696	0	5.43	1	1	589	61.7048	6.49365
21224149	transcriptional regulator NrdR [Streptomyces coelicolor A3(2)]	17.03	1	3	3	10	3.35617e+08	1.04395	0.927864	1.16816	35.2263	17.03	5	10	182	19.7067	5.30029
21219056	TetR family transcriptional regulator, partial [Streptomyces coelicolor A3(2)]	3.11	1	1	1	2	2.27485e+07	1.04391	1.14406	0.91242	3.55069	3.11	1	2	193	20.6629	5.77002
21219537	hypothetical protein SCO1020 [Streptomyces coelicolor A3(2)]	2.73	1	1	1	3	9.85388e+06	1.04376	1.11948	0.932319	7.08946	2.73	2	3	440	46.6219	7.53271
21222451	hypothetical protein SCO4048 [Streptomyces coelicolor A3(2)]	43.98	1	5	5	30	2.66186e+08	1.04371	1.16131	0.893924	142.277	43.98	9	30	241	26.3923	5.89697
21220021	hypothetical protein SCO1521 [Streptomyces coelicolor A3(2)]	35.2	1	7	7	30	1.56815e+08	1.04364	1.03825	1.01641	84.5895	35.2	14	30	250	26.8145	4.729
21223110	tRNA pseudouridine synthase A [Streptomyces coelicolor A3(2)]	3.17	1	1	1	1	0	1.04355	1.04051	1.00288	0	3.17	1	1	284	31.2931	8.48486
32141143	ATP phosphoribosyltransferase [Streptomyces coelicolor A3(2)]	83.51	1	18	18	104	1.95407e+08	1.04353	1.01012	1.04362	364.956	83.51	34	104	285	30.886	5.23682
21219396	transcription regulator ArsR [Streptomyces coelicolor A3(2)]	11.71	1	1	1	1	2.3224e+07	1.04339	0.972433	1.07293	2.0051	11.71	1	1	111	12.1802	5.30029
21220208	hypothetical protein SCO1714 [Streptomyces coelicolor A3(2)]	4.76	1	1	1	4	1.7053e+07	1.04334	0.899341	1.16007	11.1239	4.76	2	4	189	20.022	4.4751
21218795	hypothetical protein SCO0242 [Streptomyces coelicolor A3(2)]	36.05	1	2	2	12	4.00271e+07	1.04303	1.32784	0.797633	52.979	36.05	3	12	147	15.877	4.75439
21224043	1-deoxy-D-xylulose 5-phosphate reductoisomerase [Streptomyces coelicolor A3(2)]	10.29	1	3	3	10	2.47805e+07	1.04296	1.08441	0.962372	34.1423	10.29	6	10	418	43.7447	5.14795
21219570	aminotransferase [Streptomyces coelicolor A3(2)]	16	1	5	5	12	2.29582e+07	1.04295	1.08734	1.01771	32.835	16	10	12	400	42.041	5.49072
21220266	regulatory protein [Streptomyces coelicolor A3(2)]	1.03	1	1	1	1	0	1.04293	1.49382	0.698137	1.87866	1.03	1	1	682	73.1393	6.59521
21223106	30S ribosomal protein S13 [Streptomyces coelicolor A3(2)]	56.35	1	10	10	64	7.0557e+08	1.0429	0.952285	1.07335	202.298	56.35	20	64	126	14.2108	11.1948
21224959	transketolase [Streptomyces coelicolor A3(2)]	44.13	1	23	24	112	3.68402e+08	1.04287	0.989016	1.05444	334.97	44.13	47	112	698	74.5414	5.68115
21224187	hypothetical protein SCO5843 [Streptomyces coelicolor A3(2)]	72.82	1	7	7	30	6.79855e+07	1.04282	1.01215	1.03815	135.835	72.82	14	30	195	20.6953	4.91943
21220356	hypothetical protein SCO1868 [Streptomyces coelicolor A3(2)]	27.47	1	5	5	20	4.41127e+07	1.04276	1.24272	0.896388	85.0784	27.47	10	20	364	37.6091	5.16064
21223322	nitrate reductase subunit delta NarJ3 [Streptomyces coelicolor A3(2)]	26.82	1	5	5	25	7.75203e+07	1.04274	0.922675	1.12492	65.4782	26.82	10	25	220	24.3888	9.27588
21221522	hypothetical protein SCO3081 [Streptomyces coelicolor A3(2)]	12.37	1	1	1	4	2.48609e+07	1.04254	0.991932	1.05097	14.1287	12.37	2	4	97	10.3133	4.7417
21222683	trehalose-phosphate synthase [Streptomyces coelicolor A3(2)]	23.81	1	8	8	34	3.59244e+07	1.04246	1.09652	0.949999	99.9864	23.81	14	34	462	50.2496	5.23682
21220531	phosphoribosyl isomerase A [Streptomyces coelicolor A3(2)]	81.25	1	14	14	86	2.664e+08	1.04234	1.06927	0.964731	335.855	81.25	28	86	240	25.0649	4.81787
21224006	hypothetical protein SCO5655 [Streptomyces coelicolor A3(2)]	36.98	1	15	15	84	3.10712e+08	1.04208	1.00536	0.991611	288.224	36.98	30	84	457	50.4423	5.37646
21222562	hypothetical protein SCO4165 [Streptomyces coelicolor A3(2)]	77.89	1	5	5	32	2.61168e+08	1.04207	1.02695	1.0106	109.893	77.89	10	32	95	9.67888	4.77979
21221007	Hit-family protein [Streptomyces coelicolor A3(2)]	48.72	1	5	5	34	3.63884e+08	1.04189	1.04398	0.9652	122.851	48.72	10	34	117	12.4363	5.66846
21221357	cysteine synthase [Streptomyces coelicolor A3(2)]	49.68	1	11	11	49	6.8929e+07	1.04187	0.978373	1.04801	143.451	49.68	22	49	316	33.8453	5.68115
21220279	iron-siderophore uptake system transmembrane protein [Streptomyces coelicolor A3(2)]	2.87	1	1	1	2	6.8717e+06	1.0418	0.996611	1.0453	6.84458	2.87	2	2	348	35.7746	10.2866
21223040	30S ribosomal protein S12 [Streptomyces coelicolor A3(2)]	56.1	1	7	7	71	7.30137e+08	1.04134	1.07989	0.993764	194.805	56.1	14	71	123	13.7627	11.1948
21218760	LuxR family transcriptional regulator [Streptomyces coelicolor A3(2)]	54.51	1	9	10	62	3.92277e+08	1.04072	1.0151	1.06215	216.632	54.51	20	62	233	25.4062	5.09717
21220425	6-phosphogluconolactonase [Streptomyces coelicolor A3(2)]	36.78	1	9	9	45	2.21421e+08	1.04072	0.98889	1.03211	142.142	36.78	18	45	261	27.1941	5.61768
21221218	ribonuclease [Streptomyces coelicolor A3(2)]	7.34	1	1	1	2	3.78215e+07	1.04039	1.40873	0.738494	5.03677	7.34	1	2	286	30.6498	5.19873
21223363	hypothetical protein SCO4990 [Streptomyces coelicolor A3(2)]	76.47	1	6	6	40	1.50354e+08	1.04038	1.15312	0.858207	146.455	76.47	12	40	136	14.5415	5.17334
21221990	hydrolase [Streptomyces coelicolor A3(2)]	4.3	1	1	1	4	7.22043e+06	1.04033	1.08284	0.960706	14.3183	4.3	2	4	256	27.178	5.33838
21222182	penicillin binding protein [Streptomyces coelicolor A3(2)]	1.1	1	1	1	2	1.55104e+07	1.03997	1.2241	0.849542	0	1.1	1	2	546	56.8348	5.07178
21223018	hypothetical protein SCO4636 [Streptomyces coelicolor A3(2)]	57.33	1	7	7	29	1.24559e+08	1.03982	1.11353	0.957371	100.484	57.33	14	29	150	16.1422	5.05908
21224935	hypothetical protein SCO6638 [Streptomyces coelicolor A3(2)]	12.23	1	6	6	28	2.5338e+07	1.03976	1.09471	0.900328	91.903	12.23	12	28	605	67.7274	5.21143
21219927	hypothetical protein SCO1424 [Streptomyces coelicolor A3(2)]	24.63	1	9	9	38	4.96126e+07	1.03923	0.956308	1.05737	113.22	24.63	18	38	536	55.3561	5.57959
21220361	acetyltransferase [Streptomyces coelicolor A3(2)]	5.77	1	1	1	4	0	1.03918	0.877145	1.18468	8.75985	5.77	2	4	156	17.2618	6.94678
21222544	ECF family RNA polymerase sigma factor [Streptomyces coelicolor A3(2)]	4.44	1	1	1	1	1.12161e+07	1.03908	0.7418	1.40069	2.15643	4.44	1	1	180	20.0727	10.5063
21223827	serine hydroxymethyltransferase [Streptomyces coelicolor A3(2)]	15.24	1	5	5	32	7.29911e+07	1.03906	1.00537	1.03318	113.392	15.24	10	32	420	44.7481	6.30322
21223774	hypothetical protein SCO5414 [Streptomyces coelicolor A3(2)]	11.01	1	1	1	4	1.08866e+07	1.03874	0.797507	1.30243	16.224	11.01	2	4	109	11.8965	9.34912
21222367	prephenate dehydratase [Streptomyces coelicolor A3(2)]	18.06	1	3	3	14	3.45929e+07	1.03868	0.91493	1.13932	48.8398	18.06	6	14	310	33.42	5.07178
21223234	succinate dehydrogenase membrane subunit [Streptomyces coelicolor A3(2)]	11.11	1	1	1	4	71213013	1.03844	0.99944	1.03897	19.2996	11.11	2	4	126	14.0996	9.46631
21222286	DNA polymerase III subunit beta [Streptomyces coelicolor A3(2)]	66.49	1	16	16	120	4.39564e+08	1.03826	1.02269	1.04486	412.843	66.49	32	120	376	39.9319	4.69092
21223953	signal peptidase I [Streptomyces coelicolor A3(2)]	13.99	1	2	2	8	1.51983e+07	1.03817	0.837032	1.27232	32.1526	13.99	4	8	336	35.843	5.46533
21219595	hypothetical protein SCO1080 [Streptomyces coelicolor A3(2)]	2.55	1	1	1	4	1.56496e+07	1.03795	0.965225	1.0753	14.4647	2.55	2	4	432	45.814	5.36377
21224602	hypothetical protein SCO6283 [Streptomyces coelicolor A3(2)]	29.89	1	5	5	24	1.18827e+08	1.03787	1.12651	0.934906	117.634	29.89	10	24	281	29.7652	4.77979
32141135	reductase [Streptomyces coelicolor A3(2)]	31.78	1	7	7	32	4.38816e+07	1.03782	0.987041	1.09693	105.327	31.78	13	32	321	33.9383	5.18604
21220095	50S ribosomal protein L20 [Streptomyces coelicolor A3(2)]	70.08	1	13	13	111	1.04051e+09	1.03768	0.97205	1.02278	352.8	70.08	26	111	127	14.3779	10.8726
21223187	succinyl-CoA synthetase subunit alpha [Streptomyces coelicolor A3(2)]	70.41	2	15	15	286	3.05004e+09	1.03752	0.941834	1.10862	988.734	70.41	30	286	294	30.2197	5.70654
21223085	50S ribosomal protein L2 [Streptomyces coelicolor A3(2)]	53.96	1	15	15	126	1.11995e+09	1.03725	0.998423	1.04145	369.754	53.96	30	126	278	30.5323	11.3853
21223103	methionine aminopeptidase [Streptomyces coelicolor A3(2)]	15.83	1	5	5	18	3.94059e+07	1.03719	1.06986	0.956602	50.1294	15.83	9	18	278	29.6101	5.60498
21222963	fumarylacetoacetase [Streptomyces coelicolor A3(2)]	37.56	1	10	10	50	1.24234e+08	1.03699	1.08958	0.979943	219.765	37.56	20	50	418	44.8446	5.10986
21220044	hypothetical protein SCO1544 [Streptomyces coelicolor A3(2)]	43.59	1	6	6	28	8.94657e+07	1.03697	1.09276	0.953021	107.52	43.59	12	28	195	21.3529	5.26221
21223824	hydrolase [Streptomyces coelicolor A3(2)]	10.27	1	1	1	4	8.78222e+07	1.03677	1.18651	0.873769	20.8599	10.27	2	4	185	20.7813	6.80029
21221355	hypothetical protein SCO2908 [Streptomyces coelicolor A3(2)]	34.4	1	6	6	18	4.06199e+07	1.03663	1.12866	0.951784	72.1632	34.4	12	18	250	26.9721	5.30029
21222263	septation inhibitor protein [Streptomyces coelicolor A3(2)]	10.71	1	1	1	12	1.78226e+07	1.03663	0.828218	1.23955	32.3904	10.71	2	12	84	9.18191	10.2134
21222879	transcription regulator AsnC [Streptomyces coelicolor A3(2)]	19.16	1	3	3	12	5.91799e+07	1.03656	1.00213	1.03044	38.5198	19.16	6	12	167	17.9082	5.63037
21224335	aconitate hydratase [Streptomyces coelicolor A3(2)]	67.48	1	45	45	505	1.41216e+09	1.03649	0.91079	1.12419	1733.38	67.48	89	505	904	97.3199	5.0083
21220847	hypothetical protein SCO2380 [Streptomyces coelicolor A3(2)]	15.02	1	3	3	18	7.5879e+07	1.03627	1.05019	1.01274	70.7002	15.02	6	18	273	28.7235	5.56689
21225235	hypothetical protein SCO6948, partial [Streptomyces coelicolor A3(2)]	19.13	1	3	3	11	4.30637e+07	1.03625	1.17073	0.86896	34.9907	19.13	6	11	183	20.2571	5.50342
21219401	hypothetical protein SCO0881 [Streptomyces coelicolor A3(2)]	2.8	1	1	1	2	1.10177e+07	1.03614	1.01703	1.01875	5.43245	2.8	2	2	321	35.0817	5.85889
21223658	oxygenase subunit [Streptomyces coelicolor A3(2)]	40.48	1	10	10	48	1.59089e+08	1.03603	1.20307	0.852276	153.895	40.48	18	48	420	45.6225	5.16064
21222473	phosphoribosylaminoimidazole-succinocarboxamide synthase [Streptomyces coelicolor A3(2)]	59.2	1	14	14	78	2.90371e+08	1.03601	1.11688	0.951375	258.054	59.2	28	78	299	33.0446	4.76709
21221222	hypothetical protein SCO2771 [Streptomyces coelicolor A3(2)]	24.81	1	5	5	20	5.48761e+07	1.03585	1.08273	0.970436	76.0418	24.81	10	20	262	28.3722	4.99561
21225870	hypothetical protein SCO7608 [Streptomyces coelicolor A3(2)]	38.67	1	2	2	8	4.60459e+07	1.03558	1.04951	0.952202	29.4585	38.67	4	8	150	16.6092	4.91943
21222480	phosphoribosylformylglycinamidine synthase I [Streptomyces coelicolor A3(2)]	55.31	1	7	7	47	1.63205e+08	1.03556	0.936095	1.01742	164.522	55.31	14	47	226	24.5125	5.99854
21224312	arginine deiminase [Streptomyces coelicolor A3(2)]	10.29	1	4	4	24	1.41378e+07	1.03521	1.10701	0.919284	62.6245	10.29	8	24	418	46.5624	5.90967
21223215	tryptophanyl-tRNA synthetase [Streptomyces coelicolor A3(2)]	40.12	1	12	12	51	1.11724e+08	1.03494	1.04099	0.970847	175.564	40.12	24	51	339	37.5691	5.74463
21222722	hypothetical protein SCO4330 [Streptomyces coelicolor A3(2)]	7.79	1	1	1	4	1.60103e+07	1.0348	1.06348	0.972994	17.3845	7.79	2	4	308	32.219	4.80518
21220584	thiamine-phosphate pyrophosphorylase [Streptomyces coelicolor A3(2)]	61.43	1	9	9	43	1.19385e+08	1.03465	1.10239	0.958476	148.34	61.43	18	43	223	23.342	5.61768
21221765	AraC family transcription regulator [Streptomyces coelicolor A3(2)]	1.8	1	1	1	1	178838126	1.03456	1.12972	0.915723	0	1.8	1	1	334	35.6056	9.17334
21221775	dihydroxy-acid dehydratase [Streptomyces coelicolor A3(2)]	54.78	1	31	31	144	1.87388e+08	1.03419	1.00422	1.02957	485.448	54.78	61	144	617	65.0746	5.35107
21224089	FAD-dependent thymidylate synthase [Streptomyces coelicolor A3(2)]	32.11	1	7	7	39	8.03436e+07	1.03399	1.04915	0.967525	107.842	32.11	14	39	246	27.7668	6.65381
21221748	uroporphyrin-III C-methyltransferase/uroporphyrinogen-III synthase [Streptomyces coelicolor A3(2)]	11.5	1	5	5	16	2.79487e+07	1.03391	0.907919	1.13257	40.7096	11.5	10	16	565	59.0456	5.80811
21219597	electron transfer flavoprotein subunit beta [Streptomyces coelicolor A3(2)]	72.14	1	16	16	143	8.15066e+08	1.03385	1.03581	1.01887	441.618	72.14	31	143	262	27.733	4.43701
21223209	glycine/betaine-binding lipoprotein [Streptomyces coelicolor A3(2)]	15.53	1	3	3	16	3.53024e+07	1.03348	0.974945	1.09072	66.9886	15.53	6	16	322	35.9341	6.69775
21224796	hypothetical protein SCO6493 [Streptomyces coelicolor A3(2)]	44.35	1	4	4	16	9.88694e+07	1.03325	1.15435	0.887798	54.5971	44.35	8	16	115	12.2023	4.88135
21219892	mannose-1-phosphate guanyltransferase [Streptomyces coelicolor A3(2)]	49.82	1	27	27	141	2.08899e+08	1.03325	1.04745	0.995898	503.875	49.82	53	141	831	89.5533	5.14795
21223924	phosphopantetheine adenylyltransferase [Streptomyces coelicolor A3(2)]	54.72	1	7	7	30	1.09541e+08	1.03321	1.01886	1.01692	104.147	54.72	14	30	159	17.8012	5.89697
21223572	hypothetical protein SCO5203 [Streptomyces coelicolor A3(2)]	18.39	1	4	4	14	2.75246e+07	1.03321	1.02024	0.990722	41.2346	18.39	8	14	223	23.9703	4.70361
21223405	alkyl hydroperoxide reductase [Streptomyces coelicolor A3(2)]	20.65	1	3	3	12	4.55158e+07	1.03318	1.14586	0.92213	39.1962	20.65	6	12	184	20.7131	4.70361
21222329	hypothetical protein SCO3923 [Streptomyces coelicolor A3(2)]	19.05	1	2	2	10	3.77762e+07	1.03279	0.970972	1.05427	28.7349	19.05	4	10	105	11.5308	5.74463
21219286	protease inhibitor protein [Streptomyces coelicolor A3(2)]	47.22	1	4	4	24	2.53119e+08	1.03258	1.23628	0.870868	97.6291	47.22	8	24	144	14.4242	7.26904
21223293	flavoprotein disulfide reductase [Streptomyces coelicolor A3(2)]	44.84	1	14	14	70	2.55889e+08	1.03253	1.01134	1.01153	222.424	44.84	25	70	475	49.7848	5.80811
21221349	deoxyribonucleotide triphosphate pyrophosphatase [Streptomyces coelicolor A3(2)]	67	1	7	7	48	3.06934e+08	1.03251	1.03072	0.959601	163.693	67	14	48	200	20.8768	5.5415
21224534	hypothetical protein SCO6210 [Streptomyces coelicolor A3(2)]	17.29	1	2	2	6	1.12812e+07	1.03246	1.04136	0.986054	19.6829	17.29	4	6	133	14.2091	5.78271
21224121	glutamate permease [Streptomyces coelicolor A3(2)]	11.71	1	2	2	7	2.12272e+07	1.03223	0.986695	1.04246	22.6573	11.71	3	7	222	23.2189	9.24658
21225065	hypothetical protein SCO6772 [Streptomyces coelicolor A3(2)]	29.62	1	7	7	30	7.52365e+07	1.0322	1.1323	0.907985	96.466	29.62	13	30	287	31.3641	6.06201
21223297	hypothetical protein SCO4923 [Streptomyces coelicolor A3(2)]	39.81	1	3	3	9	3.71659e+07	1.03169	1.03435	0.960615	36.5764	39.81	5	9	206	21.253	5.03369
21219596	electron transfer flavoprotein subunit alpha [Streptomyces coelicolor A3(2)]	58.13	1	10	10	103	1.19244e+09	1.03153	1.04768	0.999547	445.558	58.13	18	103	320	32.293	5.26221
32141275	SuhB protein, partial [Streptomyces coelicolor A3(2)]	15.07	1	3	3	6	1.8139e+07	1.03142	1.08221	0.913558	15.9076	15.07	6	6	272	28.6757	4.88135
21220134	peptidyl-prolyl cis-trans isomerase [Streptomyces coelicolor A3(2)]	8.13	1	1	1	8	5.83875e+08	1.03138	1.26009	0.818459	20.987	8.13	2	8	123	13.0076	4.7417
21222281	DNA gyrase subunit A [Streptomyces coelicolor A3(2)]	47.49	4	33	35	174	1.93907e+08	1.03106	0.996393	1.03658	517.887	47.49	67	174	857	94.5248	5.56689
21222894	hypothetical protein SCO4509 [Streptomyces coelicolor A3(2)]	40.32	1	4	4	48	8.04889e+08	1.03105	0.89269	1.16418	135.505	40.32	8	48	124	14.0309	6.34131
21220280	hypothetical protein SCO1788 [Streptomyces coelicolor A3(2)]	42.86	1	9	9	32	5.84403e+07	1.03095	1.03275	1.05225	109.265	42.86	18	32	343	35.1338	4.79248
21219628	uracil-DNA glycosylase [Streptomyces coelicolor A3(2)]	3.11	1	1	1	1	8.29668e+07	1.03091	0.895358	1.15134	2.34463	3.11	1	1	225	24.4409	9.94971
21221531	cyclopropane-fatty-acyl-phospholipid synthase [Streptomyces coelicolor A3(2)]	18.49	1	6	8	19	7.60685e+07	1.0309	0.841229	1.36652	56.6806	18.49	12	19	438	48.1611	7.66455
21224373	hypothetical protein SCO6042 [Streptomyces coelicolor A3(2)]	61.32	1	13	13	70	3.95619e+08	1.03071	1.18332	0.895512	233.805	61.32	25	70	243	28.1142	6.06201
21219613	MarR family regulatory protein [Streptomyces coelicolor A3(2)]	5.76	1	1	1	2	8102467	1.03058	0.807204	1.27668	7.97301	5.76	2	2	191	19.9904	6.22705
21224105	hypothetical protein SCO5759 [Streptomyces coelicolor A3(2)]	39.13	1	4	4	20	5.57793e+07	1.03053	1.19322	0.85678	67.28	39.13	8	20	161	17.9476	4.4751
21221691	regulatory protein [Streptomyces coelicolor A3(2)]	11.02	1	1	1	2	8.96639e+06	1.03032	0.930245	1.10753	4.54668	11.02	1	2	118	12.3933	5.47803
21219997	chorismate synthase [Streptomyces coelicolor A3(2)]	27.16	1	7	7	26	2.2637e+07	1.03017	1.07831	0.971479	77.8647	27.16	13	26	394	41.5516	6.68311
21220430	triosephosphate isomerase [Streptomyces coelicolor A3(2)]	91.47	1	19	19	273	1.22472e+09	1.03011	1.06961	0.950533	971.223	91.47	37	273	258	27.7191	5.38916
21220409	dioxygenase ferredoxin subunit [Streptomyces coelicolor A3(2)]	24.76	1	3	3	16	9.24507e+07	1.03002	1.16139	0.878225	54.7663	24.76	6	16	105	11.5406	4.61475
21219733	ornithine aminotransferase [Streptomyces coelicolor A3(2)]	21.62	1	4	5	18	6.88396e+07	1.03002	0.940462	1.13357	65.6734	21.62	9	18	407	42.8796	6.03662
21223096	30S ribosomal protein S8 [Streptomyces coelicolor A3(2)]	45.45	1	6	6	44	1.00268e+09	1.02986	1.08201	0.990156	132.318	45.45	12	44	132	14.2676	9.70068
21221575	UDP-glucose 4-epimerase [Streptomyces coelicolor A3(2)]	69.78	1	11	11	65	2.03919e+08	1.02975	1.00448	0.987006	262.428	69.78	21	65	321	33.848	5.60498
21222557	transcriptional regulator [Streptomyces coelicolor A3(2)]	24.72	1	6	6	24	2.48634e+07	1.02972	0.822736	1.18352	58.7824	24.72	10	24	267	28.8692	5.98584
21223473	mutT-like protein [Streptomyces coelicolor A3(2)]	6.25	1	1	1	4	8.57724e+06	1.02943	0.900458	1.14318	11.6666	6.25	2	4	144	15.3301	5.14795
21220857	3-oxoacyl-ACP synthase [Streptomyces coelicolor A3(2)]	29.37	1	7	7	17	4.21926e+07	1.02909	0.901649	1.13053	59.6893	29.37	14	17	429	43.8143	5.23682
21223105	50S ribosomal protein L36 [Streptomyces coelicolor A3(2)]	40.54	1	2	2	12	1.45655e+08	1.02904	1.10742	0.944722	20.7901	40.54	4	12	37	4.3984	11.0044
32141166	tetracenomycin C efflux protein, partial [Streptomyces coelicolor A3(2)]	1.87	1	1	1	2	2.949e+06	1.02885	1.01225	1.01635	5.60509	1.87	2	2	536	54.5588	5.96045
21221012	oxidoreductase [Streptomyces coelicolor A3(2)]	16.21	1	4	4	16	3.14796e+07	1.02854	0.944478	0.998235	52.5956	16.21	8	16	364	37.305	6.03662
21223109	50S ribosomal protein L17 [Streptomyces coelicolor A3(2)]	66.07	1	13	13	132	6.84782e+08	1.02837	0.936648	1.05724	438.765	66.07	26	132	168	18.1196	9.42236
32141253	oxidoreductase [Streptomyces coelicolor A3(2)]	49.02	1	10	10	133	2.18768e+09	1.02836	1.06539	0.972414	511.683	49.02	20	133	306	31.4666	6.27783
21225572	hypothetical protein SCO7296 [Streptomyces coelicolor A3(2)]	52.14	1	3	3	16	1.05387e+08	1.02831	1.01499	0.959936	68.5328	52.14	6	16	117	12.4505	5.14795
32141272	polynucleotide phosphorylase/polyadenylase, partial [Streptomyces coelicolor A3(2)]	57.51	1	34	34	300	9.83147e+08	1.02791	1.01263	1.0033	1032.17	57.51	68	300	739	79.3103	5.14795
21222973	hypothetical protein SCO4590 [Streptomyces coelicolor A3(2)]	17.95	1	2	2	4	1.80118e+07	1.02782	0.985572	1.04283	13.6157	17.95	4	4	156	17.1878	5.92236
21221832	hypoxanthine phosphoribosyltransferase [Streptomyces coelicolor A3(2)]	26.2	1	6	6	28	2.14317e+08	1.02774	1.00606	0.981662	56.3325	26.2	12	28	187	20.2005	4.94482
21219303	zinc-binding oxidoreductase [Streptomyces coelicolor A3(2)]	25.56	1	5	5	14	3.85996e+07	1.02758	1.01385	1.04763	48.9762	25.56	9	14	313	33.1924	6.3667
21225596	hypothetical protein SCO7320 [Streptomyces coelicolor A3(2)]	1.38	1	1	1	1	1.11742e+07	1.02755	0.926173	1.10941	1.6568	1.38	1	1	580	61.5058	5.49072
21220254	chorismate mutase [Streptomyces coelicolor A3(2)]	34.17	1	3	3	12	4.90516e+07	1.02746	1.10555	0.953034	35.985	34.17	6	12	120	12.7857	5.45264
21223019	hypothetical protein SCO4637 [Streptomyces coelicolor A3(2)]	71.83	1	7	7	32	1.35442e+08	1.02746	1.15408	0.976042	122.878	71.83	14	32	142	15.2358	5.5542
21223449	hypothetical protein SCO5078 [Streptomyces coelicolor A3(2)]	46.26	1	10	10	113	1.74403e+09	1.02745	1.00797	1.02986	449.207	46.26	20	113	281	30.0104	6.55127
21220524	anthranilate synthase component I [Streptomyces coelicolor A3(2)]	6.77	1	3	3	12	1.23975e+07	1.0273	0.927521	1.1111	37.4935	6.77	6	12	502	54.1305	5.09717
21219059	gluconolactonase [Streptomyces coelicolor A3(2)]	9.27	1	3	3	8	2.21825e+07	1.02715	0.912913	1.12508	20.4654	9.27	5	8	302	33.4645	5.37646
21221022	30S ribosomal protein S20 [Streptomyces coelicolor A3(2)]	39.77	1	6	6	53	7.65479e+08	1.02649	0.963072	1.07639	130.84	39.77	12	53	88	9.53638	10.9604
21223083	50S ribosomal protein L4 [Streptomyces coelicolor A3(2)]	43.38	1	6	6	49	1.21959e+09	1.02644	0.969356	1.04951	168.454	43.38	12	49	219	23.6285	10.0376
21221910	aldehyde dehydrogenase [Streptomyces coelicolor A3(2)]	14.63	1	5	5	22	3.39392e+07	1.02619	0.941378	1.07741	71.2951	14.63	10	22	492	52.1406	5.74463
21222315	30S ribosomal protein S18 [Streptomyces coelicolor A3(2)]	43.59	1	5	5	35	5.95999e+08	1.02604	1.00709	1.02732	88.647	43.59	10	35	78	8.98377	10.3745
21223697	mutT-like protein [Streptomyces coelicolor A3(2)]	28.21	1	3	3	16	4.2547e+07	1.02603	1.03349	0.954054	51.6456	28.21	6	16	156	17.0024	4.83057
21222243	3-hydroxyacyl-CoA dehydrogenase [Streptomyces coelicolor A3(2)]	36.71	1	12	12	59	1.02283e+08	1.02588	1.05552	0.965447	177.123	36.71	24	59	504	53.2525	5.23682
21223156	protein Ser/Thr kinase [Streptomyces coelicolor A3(2)]	1.17	1	1	1	4	6.88309e+08	1.02574	1.05458	0.971065	8.82903	1.17	2	4	599	63.8992	6.354
21222279	decarboxylase [Streptomyces coelicolor A3(2)]	5.15	1	1	1	4	2.29802e+07	1.02573	0.990794	1.03522	11.2198	5.15	2	4	136	15.1426	4.91943
21223114	30S ribosomal protein S9 [Streptomyces coelicolor A3(2)]	45.88	1	10	10	57	8.12315e+08	1.02518	0.958186	1.04753	163.849	45.88	19	57	170	18.6877	9.24658
21223756	cellulose-binding protein [Streptomyces coelicolor A3(2)]	32.26	1	8	8	38	6.05317e+07	1.02494	0.877371	1.15332	150.094	32.26	16	38	310	34.5847	5.37646
21224306	hypothetical protein SCO5969 [Streptomyces coelicolor A3(2)]	36.75	3	1	2	2	25716690	1.02484	1.06422	0.962948	2.87714	36.75	2	2	117	13.1587	4.90674
21223932	acylphosphatase [Streptomyces coelicolor A3(2)]	12.9	1	1	1	4	3.74496e+07	1.02463	1.08133	0.947525	14.0547	12.9	2	4	93	10.3022	5.18604
21221244	oligoribonuclease [Streptomyces coelicolor A3(2)]	50.5	1	9	9	50	1.46713e+08	1.02462	1.01184	1.04089	149.36	50.5	17	50	200	22.0081	5.021
21224750	gamma-glutamyl transferase [Streptomyces coelicolor A3(2)]	1.39	1	1	1	1	4.64011e+06	1.02457	1.17862	0.869255	2.25709	1.39	1	1	647	68.3326	6.0874
21220936	nitrate reductase [Streptomyces coelicolor A3(2)]	16.36	1	12	12	56	3.18264e+07	1.02451	0.903652	1.13258	167.378	16.36	23	56	819	85.7097	5.69385
21225070	beta-lactamase [Streptomyces coelicolor A3(2)]	1.94	1	1	1	2	1.49142e+07	1.02428	0.966314	1.05995	1.79619	1.94	1	2	310	34.7604	5.43994
21223877	3-isopropylmalate dehydrogenase [Streptomyces coelicolor A3(2)]	42.65	1	10	10	61	1.41895e+08	1.02425	1.02895	0.970689	204.376	42.65	20	61	347	36.6661	5.19873
21219326	hypothetical protein SCO0804 [Streptomyces coelicolor A3(2)]	31.58	1	7	7	29	3.63934e+07	1.02424	1.20306	0.830886	95.7873	31.58	14	29	247	26.9825	5.04639
21222178	hypothetical protein SCO3767 [Streptomyces coelicolor A3(2)]	73.51	1	11	12	84	1.85119e+08	1.02417	1.30062	0.76638	293.105	73.51	24	84	151	16.5915	5.26221
21220330	hypothetical protein SCO1841 [Streptomyces coelicolor A3(2)]	20.1	1	2	2	5	9.04645e+07	1.02404	1.0604	0.96567	18.4367	20.1	3	5	194	20.4009	6.1001
21221603	membrane transport protein [Streptomyces coelicolor A3(2)]	0.81	1	1	1	2	119714	1.02398	0.972245	1.05316	4.42293	0.81	1	2	745	76.9279	5.42725
21221334	hypothetical protein SCO2885 [Streptomyces coelicolor A3(2)]	4.46	1	1	1	4	1.23861e+07	1.02371	1.0167	1.00685	9.61686	4.46	2	4	157	16.7485	5.13525
21219846	hypothetical protein SCO1340 [Streptomyces coelicolor A3(2)]	32.35	1	4	4	16	5.27154e+07	1.02369	1.10459	0.937981	53.2521	32.35	8	16	170	19.3625	5.43994
21224090	dihydrodipicolinate synthase [Streptomyces coelicolor A3(2)]	37.12	1	7	7	42	9.23202e+07	1.02365	0.970586	1.14587	137.591	37.12	14	42	299	31.1553	5.92236
21222065	orotate phosphoribosyltransferase [Streptomyces coelicolor A3(2)]	43.96	1	6	6	28	8.53751e+07	1.02359	1.14988	0.901042	84.3824	43.96	12	28	182	19.07	5.2749
21219931	acyl-CoA dehydrogenase [Streptomyces coelicolor A3(2)]	2.05	1	1	1	1	0	1.02337	1.00012	1.02321	2.05469	2.05	1	1	391	41.5993	5.31299
21224100	hypothetical protein SCO5754 [Streptomyces coelicolor A3(2)]	11.6	1	2	2	8	1.68533e+07	1.02298	1.00822	1.00629	30.8316	11.6	4	8	181	18.4444	4.76709
21222570	hypothetical protein SCO4173 [Streptomyces coelicolor A3(2)]	40	1	4	4	26	1.16459e+08	1.02289	1.05403	0.991395	88.1456	40	8	26	115	12.0061	4.58936
21222433	hypothetical protein SCO4030 [Streptomyces coelicolor A3(2)]	18.68	1	4	4	18	3.23047e+07	1.02288	0.876528	1.18303	52.3088	18.68	8	18	273	28.5895	5.32568
21221532	hydrolase [Streptomyces coelicolor A3(2)]	17.25	1	5	5	19	3.09631e+07	1.02264	1.07865	0.946316	48.9284	17.25	9	19	313	33.3951	4.95752
21219602	aldolase [Streptomyces coelicolor A3(2)]	53.93	2	13	13	67	1.59845e+08	1.02254	0.954957	1.05283	238.512	53.93	26	67	356	39.0836	6.32861
21223917	hypothetical protein SCO5561 [Streptomyces coelicolor A3(2)]	50.65	1	4	4	15	6.74578e+07	1.02251	1.06914	0.950866	45.325	50.65	8	15	77	8.26138	4.94482
21219302	hypothetical protein SCO0779 [Streptomyces coelicolor A3(2)]	5.34	1	1	1	4	0	1.0222	1.0339	0.988647	9.94777	5.34	2	4	131	14.1782	5.16064
21224360	ribonuclease [Streptomyces coelicolor A3(2)]	22.59	1	8	8	32	1.54739e+08	1.02216	0.990674	1.02675	72.9667	22.59	15	32	394	42.4353	6.72705
32141252	4-hydroxy-3-methylbut-2-enyl diphosphate reductase [Streptomyces coelicolor A3(2)]	40.83	1	13	13	50	8.80208e+07	1.0221	0.964587	1.06381	160.842	40.83	25	50	338	36.5868	4.90674
21218943	epimerase [Streptomyces coelicolor A3(2)]	37.16	1	4	4	23	5.28414e+07	1.0221	1.2455	0.800032	74.5168	37.16	8	23	183	19.942	5.41455
21220769	hypothetical protein SCO2300 [Streptomyces coelicolor A3(2)]	53.06	1	10	10	46	7.58271e+07	1.02185	1.12269	0.896036	159.206	53.06	20	46	196	21.5999	4.86865
21219266	oxidoreductase [Streptomyces coelicolor A3(2)]	59.39	1	18	18	108	2.14983e+08	1.02182	1.02518	0.979272	387.188	59.39	34	108	362	37.9263	5.26221
21224473	alditol oxidase [Streptomyces coelicolor A3(2)]	4.07	1	1	1	4	3.69914e+07	1.02172	1.19015	0.858446	17.0541	4.07	2	4	418	44.3188	6.11279
21218725	regulator protein [Streptomyces coelicolor A3(2)]	27.37	1	5	5	25	1.43824e+08	1.02153	0.968708	1.07447	76.7724	27.37	9	25	190	21.1249	7.25439
32141270	translation initiation factor IF-2 [Streptomyces coelicolor A3(2)]	24.98	1	21	21	101	1.38988e+08	1.02146	0.848565	1.18177	351.517	24.98	42	101	1033	105.593	9.46631
21224166	DNA topoisomerase IV subunit B [Streptomyces coelicolor A3(2)]	2.83	1	1	2	15	1.14812e+08	1.02125	0.879599	1.13609	46.6744	2.83	4	15	707	77.222	8.17725
161353681	phenylalanyl-tRNA synthetase subunit alpha [Streptomyces coelicolor A3(2)]	53.07	1	12	12	65	2.06817e+08	1.02098	0.982077	1.02585	182.184	53.07	22	65	358	39.0942	4.93213
21225913	acetyltransferase [Streptomyces coelicolor A3(2)]	9.84	1	1	1	8	34101892	1.02064	1.0979	0.939455	39.6157	9.84	2	8	183	20.3642	6.53662
21220162	phosphatase [Streptomyces coelicolor A3(2)]	38.16	1	5	5	29	7.05059e+07	1.02032	0.972426	1.05367	108.126	38.16	10	29	228	24.4234	5.79541
21220624	anthranilate phosphoribosyltransferase [Streptomyces coelicolor A3(2)]	50.56	1	14	14	67	1.40114e+08	1.02018	0.957648	1.05176	226.352	50.56	27	67	354	36.9952	5.59229
21223017	50S ribosomal protein L33 [Streptomyces coelicolor A3(2)]	33.33	1	2	2	13	225293554	1.01998	1.07533	0.955943	30.8255	33.33	4	13	54	6.40224	9.90576
21225532	hypothetical protein SCO7255 [Streptomyces coelicolor A3(2)]	8.24	1	2	2	5	1.0616e+09	1.01957	1.14006	0.894281	8.7019	8.24	2	5	364	39.8294	5.0083
21223902	glutamyl-tRNA synthetase [Streptomyces coelicolor A3(2)]	56.28	1	26	26	143	2.56471e+08	1.01943	0.97343	1.05898	520.325	56.28	52	143	494	54.8828	5.19873
21220735	methionine aminopeptidase [Streptomyces coelicolor A3(2)]	4.56	1	1	1	4	10199225	1.01921	1.02476	0.994542	10.7131	4.56	2	4	285	31.1237	6.17627
21221669	oxygenase [Streptomyces coelicolor A3(2)]	47.75	1	11	11	47	6.21874e+07	1.01919	4.14972	0.255367	154.258	47.75	22	47	333	35.9593	5.26221
21224957	glucose-6-phosphate 1-dehydrogenase [Streptomyces coelicolor A3(2)]	40.03	2	14	21	80	1.07788e+08	1.01873	1.09301	0.939568	259.315	40.03	40	80	592	65.6312	5.47803
21224290	hypothetical protein SCO5952 [Streptomyces coelicolor A3(2)]	5.6	1	1	1	2	1.66024e+07	1.01852	0.925268	1.10074	7.86023	5.6	2	2	250	27.7637	9.68604
21220639	two component system response regulator [Streptomyces coelicolor A3(2)]	5.29	1	1	1	3	0	1.01839	1.21148	0.840579	5.46452	5.29	2	3	227	24.3948	4.95752
21222296	thioredoxin [Streptomyces coelicolor A3(2)]	66.36	1	6	6	48	7.98502e+08	1.01826	1.05942	0.974499	196.323	66.36	12	48	110	11.8841	4.79248
21220345	bifunctional CbiGH [Streptomyces coelicolor A3(2)]	18.87	1	6	6	24	5.23874e+07	1.01794	1.03258	1.0227	87.3143	18.87	11	24	583	59.328	4.91943
21222856	glutamate-1-semialdehyde aminotransferase [Streptomyces coelicolor A3(2)]	34.7	1	8	8	48	1.28836e+08	1.01784	1.0396	0.970236	199.777	34.7	16	48	438	45.3126	5.03369
21220703	maltose-binding protein [Streptomyces coelicolor A3(2)]	1.89	1	1	1	4	7260935	1.01776	1.24174	0.819588	10.4051	1.89	2	4	423	44.5966	5.5415
32141123	aldo/keto reductase, partial [Streptomyces coelicolor A3(2)]	49.38	2	13	13	67	1.97575e+08	1.01773	1.03288	0.950923	203.61	49.38	26	67	322	35.7209	6.06201
21225535	hypothetical protein SCO7258 [Streptomyces coelicolor A3(2)]	21.74	1	3	3	12	3.36833e+07	1.01754	1.09415	0.954649	41.8282	21.74	6	12	161	17.3349	6.18896
21223335	threonine dehydratase [Streptomyces coelicolor A3(2)]	1.71	1	1	1	1	0	1.01753	0.977367	1.04105	0	1.71	1	1	409	42.2533	6.46826
21221084	ribose-5-phosphate isomerase B [Streptomyces coelicolor A3(2)]	62.89	1	7	7	50	3.45636e+08	1.01741	1.03808	0.994852	185.27	62.89	14	50	159	17.1744	5.65576
21222064	fructose-bisphosphate aldolase [Streptomyces coelicolor A3(2)]	72.59	1	17	17	293	1.83375e+09	1.01727	1.07456	0.951631	1102.64	72.59	34	293	343	36.9037	5.66846
21222642	hypothetical protein SCO4247 [Streptomyces coelicolor A3(2)]	3.33	1	1	1	2	0	1.01705	0.818066	1.24318	4.73328	3.33	2	2	240	25.6731	8.85107
21224406	dipeptidase [Streptomyces coelicolor A3(2)]	21.54	2	5	5	28	5.10239e+07	1.01695	1.12098	0.935949	104.59	21.54	10	28	376	39.889	4.89404
21221278	amino acid ABC transporter substrate-binding protein [Streptomyces coelicolor A3(2)]	44.01	1	7	7	44	7.71368e+07	1.01693	0.940952	1.11557	159.906	44.01	14	44	309	33.0582	7.40088
21220432	glyceraldehyde-3-phosphate dehydrogenase [Streptomyces coelicolor A3(2)]	90.18	1	32	32	1110	1.15156e+10	1.01653	0.925617	1.09185	3743.31	90.18	63	1110	336	36.2457	5.47803
21223570	moaE-like protein [Streptomyces coelicolor A3(2)]	15.13	1	3	3	5	1.16749e+07	1.01641	1.07077	0.92912	5.76281	15.13	5	5	152	16.2461	5.10986
21219427	dehydrogenase [Streptomyces coelicolor A3(2)]	22.97	1	4	4	14	1.77351e+07	1.01563	0.957461	1.03871	57.0106	22.97	8	14	296	30.3014	5.09717
21220549	hypothetical protein SCO2069 [Streptomyces coelicolor A3(2)]	7.65	1	1	1	4	5.01828e+07	1.01556	1.12792	0.900348	14.295	7.65	2	4	196	21.3446	4.77979
21221756	hypothetical protein SCO3325 [Streptomyces coelicolor A3(2)]	9.3	1	2	2	10	2.06857e+07	1.01533	0.73884	1.37369	32.553	9.3	4	10	355	38.4699	5.60498
21222862	cytochrome biogenesis-like protein [Streptomyces coelicolor A3(2)]	9.21	1	3	3	12	2.59503e+07	1.01531	0.869059	1.12855	43.6483	9.21	6	12	380	40.5342	9.27588
21225546	hypothetical protein SCO7269 [Streptomyces coelicolor A3(2)]	54.39	1	5	5	26	2.19911e+08	1.01517	1.20885	0.851811	118.952	54.39	10	26	171	18.7645	5.021
21220421	transketolase [Streptomyces coelicolor A3(2)]	58.99	1	27	28	241	1.38012e+09	1.01508	0.906207	1.11561	904.312	58.99	55	241	695	74.9144	5.35107
21225041	hypothetical protein SCO6747 [Streptomyces coelicolor A3(2)]	4.74	1	1	1	2	9.25817e+06	1.015	1.03368	0.981883	5.17859	4.74	2	2	211	22.3783	4.77979
21223092	50S ribosomal protein L14 [Streptomyces coelicolor A3(2)]	60.66	1	9	9	93	1.08651e+09	1.01487	0.949641	1.0704	225.963	60.66	16	93	122	13.3614	10.2573
21219060	hypothetical protein SCO0525 [Streptomyces coelicolor A3(2)]	62.73	1	10	10	50	1.87731e+08	1.01484	1.23985	0.806797	174.891	62.73	20	50	271	29.3728	4.85596
21223950	50S ribosomal protein L19 [Streptomyces coelicolor A3(2)]	42.24	1	5	5	34	1.082e+09	1.01476	0.981443	1.04223	95.6537	42.24	10	34	116	13.1342	10.8872
21221622	hypothetical protein SCO3187 [Streptomyces coelicolor A3(2)]	12.73	1	1	1	4	7.21898e+06	1.01461	0.774875	1.30934	21.3874	12.73	2	4	110	10.8248	6.46826
21221501	phosphoribosylaminoimidazole carboxylase catalytic subunit PurE [Streptomyces coelicolor A3(2)]	32.22	1	4	4	16	1.08642e+08	1.01459	0.978107	1.03551	61.9723	32.22	8	16	180	18.6736	5.52881
21221381	hypothetical protein SCO2934 [Streptomyces coelicolor A3(2)]	4.63	1	1	1	2	5.74249e+06	1.01456	0.814203	1.24602	6.40381	4.63	2	2	259	26.7279	5.22412
32141155	transcriptional regulator, partial [Streptomyces coelicolor A3(2)]	13.22	1	1	1	4	3.79995e+07	1.01454	0.928015	1.09319	13.6024	13.22	2	4	121	13.3101	4.88135
21225114	hypothetical protein SCO6821 [Streptomyces coelicolor A3(2)]	8.75	1	2	2	6	8.27176e+06	1.0145	1.04637	0.961409	18.9943	8.75	4	6	240	26.0429	5.18604
21222715	hydrolase [Streptomyces coelicolor A3(2)]	6.82	1	1	1	2	1.5408e+07	1.01446	1.05553	0.961048	9.55917	6.82	2	2	220	22.9627	4.71631
21225630	oxidoreductase [Streptomyces coelicolor A3(2)]	41.67	1	9	9	50	1.04776e+08	1.01442	1.14462	0.869043	189.249	41.67	17	50	276	30.6128	5.79541
21225247	hypothetical protein SCO6960 [Streptomyces coelicolor A3(2)]	52.25	1	9	9	31	1.36658e+08	1.01417	1.03072	0.990263	82.3821	52.25	17	31	178	19.487	6.12549
21220215	hypothetical protein SCO1721 [Streptomyces coelicolor A3(2)]	7.87	1	1	1	2	29224640	1.01416	0.856275	1.18434	0	7.87	1	2	89	9.82536	12.0591
21220139	20S proteasome alpha-subunit [Streptomyces coelicolor A3(2)]	41.73	1	9	9	54	4.83377e+08	1.01373	1.08126	0.935904	158.719	41.73	17	54	254	27.8659	4.95752
21220856	acyl carrier protein [Streptomyces coelicolor A3(2)]	45.12	1	3	3	55	2.25276e+09	1.0133	1.03734	0.991876	143.38	45.12	6	55	82	8.91151	4.24658
21220601	esterase/lipase [Streptomyces coelicolor A3(2)]	17.98	1	3	3	8	17893907	1.01327	0.905744	1.11867	29.2363	17.98	5	8	267	28.5459	6.96143
21220091	phenylalanyl-tRNA synthetase subunit beta [Streptomyces coelicolor A3(2)]	52.62	1	31	31	152	2.91749e+08	1.01322	0.990935	1.02802	525.102	52.62	60	152	840	89.9295	5.13525
21223982	ribosome recycling factor [Streptomyces coelicolor A3(2)]	77.84	1	15	15	124	4.97388e+08	1.01311	1.16044	0.890714	375.717	77.84	29	124	185	20.7738	5.30029
21220855	3-oxoacyl-ACP synthase [Streptomyces coelicolor A3(2)]	29.74	1	7	7	38	5.7482e+07	1.01281	1.0841	0.926038	161.564	29.74	13	38	343	35.9595	4.98291
21220744	lipoprotein [Streptomyces coelicolor A3(2)]	2.34	1	1	1	4	1.26529e+07	1.01274	0.869676	1.16446	13.98	2.34	2	4	384	41.5872	5.30029
21223492	peptidase [Streptomyces coelicolor A3(2)]	18.25	1	8	8	35	5.0606e+07	1.01248	0.982775	1.02766	125.544	18.25	16	35	707	75.8059	5.73193
21221535	phosphopyruvate hydratase [Streptomyces coelicolor A3(2)]	50.23	2	15	15	190	1.10274e+09	1.01216	1.02505	0.972185	796.321	50.23	29	190	426	45.4549	4.60205
21220711	glutamine synthetase [Streptomyces coelicolor A3(2)]	58.94	1	17	17	139	4.61601e+08	1.01208	0.99088	1.00868	477.828	58.94	34	139	453	50.5212	5.10986
21223604	glucosamine-6-phosphate deaminase [Streptomyces coelicolor A3(2)]	29.12	1	5	5	21	4.86155e+07	1.01199	1.59137	0.632803	75.312	29.12	10	21	261	27.4291	5.14795
21223594	ribonucleotide-diphosphate reductase large chain [Streptomyces coelicolor A3(2)]	1.01	1	1	1	2	14712792	1.01193	0.872389	1.1599	4.52881	1.01	1	2	791	86.493	5.97314
21222976	hypothetical protein SCO4593 [Streptomyces coelicolor A3(2)]	14.08	1	3	3	14	3.84688e+07	1.01181	1.04555	0.989446	44.7123	14.08	6	14	284	29.6022	5.09717
21220372	oxidoreductase [Streptomyces coelicolor A3(2)]	1.56	1	1	1	2	3.7547e+08	1.01171	1.13144	0.894136	3.70089	1.56	1	2	385	41.2053	6.48096
21220298	phosphoserine phosphatase [Streptomyces coelicolor A3(2)]	2.44	1	1	1	6	1.70608e+07	1.01151	0.990426	1.06353	16.9141	2.44	2	6	410	43.1239	5.08447
21223979	30S ribosomal protein S2 [Streptomyces coelicolor A3(2)]	52.58	1	23	23	150	7.73211e+08	1.0115	1.01137	0.992862	489.137	52.58	46	150	310	33.5714	5.18604
21223213	serine hydroxymethyltransferase [Streptomyces coelicolor A3(2)]	41.37	1	15	15	61	9.58023e+07	1.0114	0.996286	1.00219	222.017	41.37	29	61	481	51.4022	5.94775
21223899	hypothetical protein SCO5544 [Streptomyces coelicolor A3(2)]	1.66	1	1	1	1	0	1.01127	1.12373	0.899887	0	1.66	1	1	1329	139.632	6.59521
21225044	isopentenyl-diphosphate delta-isomerase [Streptomyces coelicolor A3(2)]	14.72	1	2	2	12	6.54472e+07	1.01117	1.10267	0.915294	51.1936	14.72	4	12	197	21.1796	5.32568
21220063	RNA polymerase sigma factor [Streptomyces coelicolor A3(2)]	5.42	1	1	1	1	1.6049e+07	1.0111	0.962319	1.05064	1.71095	5.42	1	1	166	18.4527	9.51025
21220928	RNA polymerase principal sigma factor [Streptomyces coelicolor A3(2)]	3.54	1	1	2	4	3.02707e+08	1.01108	0.981717	1.02987	9.02781	3.54	3	4	396	43.8104	8.42627
21220144	ATPase AAA [Streptomyces coelicolor A3(2)]	50.17	1	23	23	116	1.4144e+08	1.01084	0.946298	1.08914	344.444	50.17	46	116	588	65.1338	4.98291
21224956	hypothetical protein SCO6660 [Streptomyces coelicolor A3(2)]	47.59	1	10	11	45	1.13555e+08	1.01062	1.0742	0.894548	156.76	47.59	21	45	311	33.8969	5.93506
21220157	glycerol-3-phosphate dehydrogenase [Streptomyces coelicolor A3(2)]	5.39	1	2	2	3	1.06123e+07	1.01062	0.887516	1.13865	8.97907	5.39	3	3	538	57.477	7.54736
21221287	hypothetical protein SCO2837 [Streptomyces coelicolor A3(2)]	0.93	1	1	1	4	1936594580	1.01061	1.11018	0.910272	7.24144	0.93	2	4	645	70.792	8.79248
21223102	preprotein translocase subunit SecY [Streptomyces coelicolor A3(2)]	7.09	1	4	4	13	3.80334e+07	1.01002	0.911513	1.17553	33.6608	7.09	7	13	437	47.3404	9.42236
21220119	hypothetical protein SCO1623 [Streptomyces coelicolor A3(2)]	65.71	1	14	14	110	3.81772e+08	1.00999	1.26469	0.781662	396.699	65.71	28	110	280	31.4637	5.77002
21221367	protease [Streptomyces coelicolor A3(2)]	31.63	1	23	23	123	1.36521e+08	1.00999	1.32013	0.766842	378.549	31.63	46	123	781	85.7064	5.16064
21219852	3-oxoacyl-ACP reductase [Streptomyces coelicolor A3(2)]	31.23	1	6	6	24	5.35582e+07	1.0098	1.13697	0.873914	91.4549	31.23	12	24	253	25.9213	5.70654
21223482	GTP-binding protein [Streptomyces coelicolor A3(2)]	36.69	1	17	17	80	1.07513e+08	1.00973	0.910865	1.12439	266.356	36.69	34	80	635	69.5724	5.31299
21220454	dioxygenase [Streptomyces coelicolor A3(2)]	34.69	1	4	4	16	3.35372e+07	1.00948	1.20301	0.820823	58.2131	34.69	8	16	147	16.278	5.47803
21222061	oxidoreductase [Streptomyces coelicolor A3(2)]	8.86	1	1	1	1	3.11893e+07	1.00943	1.11097	0.908563	0	8.86	1	1	271	30.3493	5.66846
21219175	Zinc-containing dehydrogenase [Streptomyces coelicolor A3(2)]	10.39	1	3	3	12	2.10397e+07	1.00936	0.984068	1.04981	40.387	10.39	6	12	337	34.8354	5.52881
21223203	hypothetical protein SCO4826 [Streptomyces coelicolor A3(2)]	6.43	1	1	1	2	2.47597e+07	1.0093	0.812023	1.24289	9.00737	6.43	2	2	498	49.5365	7.40088
21221125	hypothetical protein SCO2669 [Streptomyces coelicolor A3(2)]	1.82	1	1	1	4	9776841	1.00929	0.588509	1.71492	12.739	1.82	2	4	604	56.6973	5.22412
21225340	esterase [Streptomyces coelicolor A3(2)]	28.57	1	8	8	28	4.61055e+07	1.0091	0.91655	1.01132	86.3997	28.57	16	28	322	34.8273	5.98584
21219975	methionyl-tRNA formyltransferase [Streptomyces coelicolor A3(2)]	40.65	1	7	7	21	3.98267e+07	1.00878	1.15122	0.897539	68.7497	40.65	12	21	310	32.6191	5.57959
21220431	phosphoglycerate kinase [Streptomyces coelicolor A3(2)]	78.91	1	25	25	233	1.11299e+09	1.00838	1.08717	0.91551	877.746	78.91	48	233	403	41.7399	5.0083
21223082	50S ribosomal protein L3 [Streptomyces coelicolor A3(2)]	67.29	2	14	14	124	1.12355e+09	1.00836	0.925757	1.05658	347.304	67.29	27	124	214	22.7551	10.1987
21225356	dihydroxyacetone kinase subunit DhaK [Streptomyces coelicolor A3(2)]	43.03	1	6	6	40	8.95049e+07	1.00818	1.19087	0.904845	145.025	43.03	12	40	330	34.2575	4.75439
21219287	oxidoreductase [Streptomyces coelicolor A3(2)]	3.86	1	2	2	5	1.58069e+07	1.00794	1.11476	0.90499	14.005	3.86	3	5	389	41.7165	5.96045
21222592	organophosphate acid anhydrase [Streptomyces coelicolor A3(2)]	2.72	1	1	1	4	31611708	1.00788	0.953572	1.01366	11.6262	2.72	2	4	404	42.7506	5.13525
21223308	lipoprotein [Streptomyces coelicolor A3(2)]	69.57	2	23	23	165	3.16296e+08	1.00775	0.967269	1.03838	537.607	69.57	45	165	414	43.4623	6.44287
21221657	hypothetical protein SCO3222 [Streptomyces coelicolor A3(2)]	33.77	2	6	6	38	2.72349e+08	1.00767	4.48929	0.228881	109.053	33.77	12	38	151	16.3428	8.45557
21223104	translation initiation factor IF-1 [Streptomyces coelicolor A3(2)]	73.97	1	4	4	23	1.20803e+08	1.00761	0.873676	1.18129	77.4012	73.97	8	23	73	8.40547	9.46631
21220520	indole-3-glycerol-phosphate synthase [Streptomyces coelicolor A3(2)]	58.36	1	12	12	45	1.76169e+08	1.00757	0.991528	0.994191	141.521	58.36	21	45	269	28.3701	5.18604
21221480	F420-0--gamma-glutamyl ligase [Streptomyces coelicolor A3(2)]	8.13	1	2	2	3	9.95965e+06	1.00738	0.912296	1.10418	8.66564	8.13	3	3	443	46.8383	5.31299
21223035	50S ribosomal protein L7/L12 [Streptomyces coelicolor A3(2)]	78.74	1	6	6	157	1.89741e+09	1.0072	0.873865	1.15359	521.059	78.74	11	157	127	13.201	4.62744
21224063	peptide transport system peptide binding protein [Streptomyces coelicolor A3(2)]	1.45	1	1	1	1	1.45683e+07	1.00716	0.826845	1.21802	2.47126	1.45	1	1	621	67.4326	5.57959
21221150	hypothetical protein SCO2695 [Streptomyces coelicolor A3(2)]	37.5	1	9	9	44	3.11768e+08	1.00681	1.09783	0.919289	148.331	37.5	18	44	256	27.2735	4.86865
21220838	hypothetical protein SCO2370 [Streptomyces coelicolor A3(2)]	54.09	1	5	5	23	2.98777e+08	1.00655	1.13466	0.879336	72.6055	54.09	9	23	159	17.1864	4.41162
21221829	hypothetical protein SCO3402 [Streptomyces coelicolor A3(2)]	14.2	1	2	2	12	2.32012e+07	1.00647	0.880566	1.2095	21.4373	14.2	4	12	162	16.8201	8.19189
21223779	thioredoxin [Streptomyces coelicolor A3(2)]	70.44	2	14	14	103	3.10879e+08	1.00626	0.963011	1.04024	332.818	70.44	28	103	318	33.5753	4.60205
21223527	hypothetical protein SCO5158 [Streptomyces coelicolor A3(2)]	4.04	1	1	1	2	4433422	1.00617	1.02904	0.977744	3.82059	4.04	2	2	198	20.896	4.85596
21219669	hypothetical protein SCO1156 [Streptomyces coelicolor A3(2)]	21.13	1	4	4	11	2.42599e+07	1.00615	0.995617	0.972939	21.8665	21.13	8	11	142	15.7961	6.34131
21221488	hypothetical protein SCO3045 [Streptomyces coelicolor A3(2)]	10.06	1	1	1	1	1.11469e+06	1.00597	0.578965	1.73747	0	10.06	1	1	507	53.7728	8.27979
21219046	glycerol kinase [Streptomyces coelicolor A3(2)]	3.75	1	2	2	4	13248292	1.00585	1.13937	0.882774	6.89884	3.75	4	4	507	55.5186	5.37646
21222618	hypothetical protein SCO4222 [Streptomyces coelicolor A3(2)]	6.35	1	1	1	4	5.49286e+06	1.00576	0.945758	1.0634	11.421	6.35	2	4	126	14.2661	4.56396
21220739	hypothetical protein SCO2270 [Streptomyces coelicolor A3(2)]	21.52	1	9	9	52	2.05718e+08	1.00569	1.0854	0.924788	215.074	21.52	18	52	539	51.9417	5.14795
21220156	glycerol kinase [Streptomyces coelicolor A3(2)]	12.89	1	6	6	26	5.48026e+07	1.00568	1.07234	0.943327	81.6741	12.89	12	26	512	55.9498	4.91943
21221422	hypothetical protein SCO2978 [Streptomyces coelicolor A3(2)]	1.72	1	1	1	6	5.05286e+06	1.00507	1.21964	0.8485	14.4696	1.72	2	6	465	48.4473	5.021
21223728	ATP synthase subunit C [Streptomyces coelicolor A3(2)]	11.84	1	1	1	8	5.08763e+08	1.00492	0.868741	1.13982	17.288	11.84	2	8	76	7.62795	4.75439
21220535	histidinol dehydrogenase [Streptomyces coelicolor A3(2)]	26.98	1	11	11	45	6.70313e+07	1.00468	0.985537	1.04173	131.283	26.98	19	45	441	46.464	5.18604
21224044	metalloprotease [Streptomyces coelicolor A3(2)]	3.02	1	1	1	2	1.43778e+07	1.0042	0.886996	1.13209	4.57167	3.02	2	2	430	46.21	6.29053
21223275	adenosine deaminase [Streptomyces coelicolor A3(2)]	35.1	1	8	8	27	4.28356e+07	1.00414	1.0913	0.893802	105.476	35.1	15	27	396	43.934	5.68115
21219996	shikimate kinase [Streptomyces coelicolor A3(2)]	7.02	1	1	1	4	8.44539e+06	1.00413	1.04143	0.964142	12.6479	7.02	2	4	171	18.2956	4.88135
21223784	acetate kinase [Streptomyces coelicolor A3(2)]	31.7	2	8	8	37	8.44782e+07	1.0038	0.930563	1.02446	153.571	31.7	16	37	407	43.3262	5.60498
21220395	large hypothetical protein [Streptomyces coelicolor A3(2)]	8.65	1	4	4	18	2.16438e+07	1.00367	0.791305	1.24054	68.0336	8.65	8	18	613	64.6583	5.38916
21219426	hypothetical protein SCO0906 [Streptomyces coelicolor A3(2)]	14.55	1	2	2	18	5.11881e+07	1.00357	1.06426	0.905292	61.3416	14.55	4	18	165	18.8735	7.1958
21221360	hypothetical protein SCO2913 [Streptomyces coelicolor A3(2)]	73.57	1	5	5	36	2.99836e+08	1.00353	1.0337	0.962289	144.681	73.57	10	36	140	15.6385	4.62744
21221735	arginyl-tRNA synthetase [Streptomyces coelicolor A3(2)]	45.22	1	21	21	114	1.49751e+08	1.00331	0.902717	1.11984	391.048	45.22	42	114	586	64.664	5.23682
21223715	homoserine dehydrogenase [Streptomyces coelicolor A3(2)]	1.63	1	1	1	2	6.13494e+06	1.00298	1.11307	0.901055	3.59024	1.63	2	2	429	44.0048	5.49072
21222652	hydrolytic protein [Streptomyces coelicolor A3(2)]	13.96	3	1	4	10	2.30226e+07	1.00292	0.743928	1.34809	37.635	13.96	8	10	480	51.8868	5.21143
32141212	ATP-dependent protease ATP-binding subunit, partial [Streptomyces coelicolor A3(2)]	24.86	2	17	19	64	1.057e+08	1.00283	1.0543	0.930872	206.369	24.86	35	64	865	94.3804	5.05908
21224123	glutamate uptake system ATP-binding protein [Streptomyces coelicolor A3(2)]	8.14	1	1	1	4	3.87978e+07	1.00281	0.919103	1.09103	13.7577	8.14	2	4	258	28.1157	6.55127
21221055	50S ribosomal protein L21 [Streptomyces coelicolor A3(2)]	45.28	1	6	6	48	1.00915e+09	1.00266	0.94503	1.05489	131.76	45.28	11	48	106	11.6573	9.59814
161353679	citrate synthase 2 [Streptomyces coelicolor A3(2)]	7.38	1	3	3	10	2.15838e+07	1.00236	1.16775	0.886617	32.5032	7.38	6	10	366	39.4911	5.85889
21220768	bifunctional RNase H/acid phosphatase [Streptomyces coelicolor A3(2)]	3.22	1	1	1	4	1.67425e+07	1.00221	1.05674	0.948363	15.8924	3.22	2	4	497	50.2474	5.47803
21222346	Ser/Thr protein kinase [Streptomyces coelicolor A3(2)]	11.96	1	4	4	17	3.67687e+07	1.00218	1.03731	0.968696	58.9551	11.96	8	17	368	39.5745	4.7417
21222808	hypothetical protein SCO4419 [Streptomyces coelicolor A3(2)]	18.44	1	2	2	4	3.18157e+07	1.00209	1.05172	0.952771	8.80523	18.44	3	4	141	15.6301	5.89697
21223150	inosine 5-monophosphate dehydrogenase [Streptomyces coelicolor A3(2)]	65.78	1	20	20	174	4.831e+08	1.00208	1.0422	0.981747	667.114	65.78	40	174	374	40.0905	5.87158
228962393	shikimate 5-dehydrogenase [Streptomyces coelicolor A3(2)]	10.75	1	1	1	1	0	1.00205	1.01408	0.988097	0	10.75	1	1	279	28.939	5.22412
21220290	hypothetical protein SCO1799 [Streptomyces coelicolor A3(2)]	3.47	1	1	1	1	4.09508e+06	1.002	0.861739	1.16272	0	3.47	1	1	259	26.7661	5.24951
21221180	methylmalonic acid semialdehyde dehydrogenase [Streptomyces coelicolor A3(2)]	39.8	1	14	14	68	1.05054e+08	1.00199	1.21674	0.844588	218.445	39.8	28	68	500	52.5408	5.57959
21219822	siderophore binding protein [Streptomyces coelicolor A3(2)]	10.67	1	2	2	8	3.15794e+07	1.00178	1.01881	0.983251	15.4802	10.67	4	8	178	18.0883	5.49072
21220140	20S proteasome subunit beta [Streptomyces coelicolor A3(2)]	55.16	1	10	10	114	7.02323e+08	1.00171	1.1147	0.883791	424.466	55.16	20	114	281	30.0672	5.03369
21223846	hypothetical protein SCO5490 [Streptomyces coelicolor A3(2)]	69.91	1	4	4	21	5.67939e+07	1.00164	1.08436	0.916326	66.5543	69.91	8	21	113	12.4682	5.42725
21225057	squalene-hopene cyclase [Streptomyces coelicolor A3(2)]	2.06	1	1	1	2	1.53002e+07	1.0016	0.858097	1.16719	8.06054	2.06	2	2	680	75.1678	5.46533
21222255	FtsW/RodA/SpoVE family cell cycle protein [Streptomyces coelicolor A3(2)]	15.03	1	2	2	3	475076	1.0016	1.1493	0.871451	0	15.03	2	3	479	51.1615	8.80713
21220241	hypothetical protein SCO1747 [Streptomyces coelicolor A3(2)]	10.6	1	3	3	10	1.59027e+07	1.00149	0.997037	1.01424	26.7138	10.6	5	10	283	30.4224	6.44287
21220289	ABC transporter ATP-binding protein [Streptomyces coelicolor A3(2)]	39.25	1	9	9	52	1.75849e+08	1.00141	1.07142	0.947903	201.166	39.25	18	52	265	29.0432	5.2876
32141144	bifunctional phosphopantothenoylcysteine decarboxylase/phosphopantothenate synthase [Streptomyces coelicolor A3(2)]	49.65	1	16	16	62	7.29159e+07	1.00141	1.01543	0.99052	228.133	49.65	32	62	427	45.0346	7.59131
21219554	hypothetical protein SCO1038 [Streptomyces coelicolor A3(2)]	8.7	1	1	1	6	5.5598e+07	1.0013	1.04377	0.961865	17.8474	8.7	2	6	115	12.6743	4.58936
21222641	hypothetical protein SCO4246 [Streptomyces coelicolor A3(2)]	11.66	1	5	5	26	2.57855e+07	1.00127	0.904649	1.11148	100.313	11.66	8	26	643	68.0384	9.46631
21221432	UDP-glucose 4-epimerase [Streptomyces coelicolor A3(2)]	59.2	1	14	14	73	2.12979e+08	1.00123	0.920724	1.08226	248.484	59.2	27	73	326	34.4475	5.14795
21223205	betaine aldehyde dehydrogenase [Streptomyces coelicolor A3(2)]	26.52	2	6	7	30	5.84853e+07	1.00116	1.06769	0.930085	97.145	26.52	14	30	509	54.2626	5.56689
21225354	hypothetical protein SCO7071 [Streptomyces coelicolor A3(2)]	10.77	1	1	1	4	4.46128e+07	1.00049	1.23203	0.812033	19.4447	10.77	2	4	130	12.3314	4.36084
21222038	hypothetical protein SCO3622 [Streptomyces coelicolor A3(2)]	22.62	1	7	7	34	8.36832e+07	1.00022	0.967496	1.02292	123.965	22.62	13	34	451	48.3831	5.37646
21223113	50S ribosomal protein L13 [Streptomyces coelicolor A3(2)]	40.82	1	6	6	67	1.23556e+09	1.00011	0.927607	1.07448	158.85	40.82	12	67	147	16.4377	9.90576
21221263	hypothetical protein SCO2813 [Streptomyces coelicolor A3(2)]	4.79	1	1	1	2	3.86186e+06	1.00006	0.932193	1.07276	2.01613	4.79	2	2	188	21.0646	5.41455
21220339	chelatase [Streptomyces coelicolor A3(2)]	4.17	1	3	3	5	1.42338e+07	1.00001	0.82397	1.2236	13.5181	4.17	4	5	672	70.1322	5.45264
21221747	dehydrogenase [Streptomyces coelicolor A3(2)]	3.49	1	1	1	4	49253630	0.999668	0.857975	1.1651	9.64718	3.49	2	4	258	26.2535	5.43994
21222349	aminotransferase [Streptomyces coelicolor A3(2)]	49.3	4	15	15	75	2.95587e+08	0.99942	1.01246	0.965013	259.782	49.3	29	75	359	38.7699	5.13525
21223084	50S ribosomal protein L23 [Streptomyces coelicolor A3(2)]	66.19	1	11	11	98	1.1117e+09	0.99935	1.00783	0.947689	324.144	66.19	22	98	139	14.9692	10.6235
21224164	RNA polymerase sigma factor [Streptomyces coelicolor A3(2)]	6.65	1	4	4	16	3.62757e+07	0.999278	0.891498	1.0996	41.9132	6.65	8	16	511	55.9004	6.12549
21220593	2-dehydro-3-deoxyphosphoheptonate aldolase [Streptomyces coelicolor A3(2)]	48.22	2	18	18	71	1.50262e+08	0.999255	0.940949	1.03289	226.041	48.22	34	71	450	49.8389	5.5542
21220118	5'-3' exonuclease [Streptomyces coelicolor A3(2)]	15.95	1	3	3	8	2.50278e+07	0.999167	0.975573	1.04019	32.3849	15.95	6	8	301	31.8958	5.17334
21220558	hypothetical protein SCO2078 [Streptomyces coelicolor A3(2)]	6.38	1	1	1	4	4.34152e+07	0.999117	0.934554	1.06904	8.83612	6.38	2	4	94	10.717	8.86572
21220354	L-ectoine synthase [Streptomyces coelicolor A3(2)]	62.88	1	8	8	37	1.09572e+08	0.999085	1.11825	0.929329	108.486	62.88	15	37	132	14.9783	5.69385
21220471	aminopeptidase [Streptomyces coelicolor A3(2)]	21.98	1	5	5	15	2.56537e+07	0.999063	1.08332	0.922051	47.7857	21.98	9	15	323	35.0186	5.59229
21220903	calcium-binding protein [Streptomyces coelicolor A3(2)]	18.53	1	4	4	14	2.94248e+07	0.998861	1.05112	0.946543	40.293	18.53	7	14	286	30.2652	5.40186
21220518	tryptophan synthase subunit beta [Streptomyces coelicolor A3(2)]	44.73	1	13	13	72	1.94023e+08	0.99877	0.960346	1.04701	246.007	44.73	26	72	427	45.3558	5.23682
21218775	acetyltransferase [Streptomyces coelicolor A3(2)]	25.42	1	4	4	18	4.72049e+07	0.998664	1.0129	0.985906	47.5664	25.42	8	18	177	20.0158	4.58936
21223555	hypothetical protein SCO5186 [Streptomyces coelicolor A3(2)]	15.41	1	4	4	11	5.47329e+07	0.998466	0.891565	1.1216	43.8219	15.41	7	11	318	34.9616	7.6499
21220990	hypothetical protein SCO2530 [Streptomyces coelicolor A3(2)]	32.95	1	2	2	7	2.49465e+07	0.998403	1.0414	0.95351	20.6269	32.95	4	7	88	9.58289	5.90967
161353683	glucose-1-phosphate adenylyltransferase [Streptomyces coelicolor A3(2)]	1.48	1	1	1	1	2.73012e+07	0.998236	0.89138	1.11983	0	1.48	1	1	406	43.4271	6.53662
21223320	nitrate reductase subunit alpha NarG3 [Streptomyces coelicolor A3(2)]	45.8	2	39	40	259	3.41512e+08	0.998177	0.89657	1.13122	924.291	45.8	77	259	1227	134.98	6.66846
21223692	hypothetical protein SCO5330 [Streptomyces coelicolor A3(2)]	4	1	1	1	2	3.05596e+07	0.998174	1.05855	0.942926	3.59999	4	1	2	300	32.3988	7.53271
21221036	hypothetical protein SCO2577 [Streptomyces coelicolor A3(2)]	39.86	1	6	6	22	7.91805e+07	0.998166	1.00683	0.911277	54.5098	39.86	11	22	148	16.7515	4.81787
21224153	hypothetical protein SCO5808 [Streptomyces coelicolor A3(2)]	5.02	1	1	1	2	6.06407e+06	0.998125	0.992532	1.00559	6.31559	5.02	2	2	219	25.6057	5.85889
21220577	hypothetical protein SCO2097 [Streptomyces coelicolor A3(2)]	5.93	1	1	1	4	0	0.997779	0.787638	1.26675	10.3376	5.93	2	4	135	15.1648	10.3159
21220830	hypothetical protein SCO2362 [Streptomyces coelicolor A3(2)]	2.38	1	2	2	5	1.54681e+07	0.997751	1.21897	0.818485	12.8171	2.38	3	5	839	89.4982	5.96045
21218753	hypothetical protein SCO0197 [Streptomyces coelicolor A3(2)]	6.16	1	1	1	4	12845935	0.997687	0.991754	1.00594	11.3752	6.16	2	4	146	15.7983	5.51611
21223454	actinorhodin transporter [Streptomyces coelicolor A3(2)]	2.6	1	1	1	4	1.53074e+07	0.997373	1.93178	0.516276	17.8371	2.6	2	4	578	59.7341	6.94678
21221299	hypothetical protein SCO2849 [Streptomyces coelicolor A3(2)]	34.83	1	8	8	25	6.8935e+07	0.997296	1.09809	0.945592	85.7822	34.83	15	25	290	31.3602	6.55127
21221213	tripeptidyl aminopeptidase [Streptomyces coelicolor A3(2)]	3.59	1	1	1	1	0	0.997107	0.918993	1.08495	0	3.59	1	1	474	53.4368	8.646
21223153	glycerol phosphate dehydrogenase [Streptomyces coelicolor A3(2)]	11.97	1	5	5	11	1.25818e+07	0.996895	0.926519	1.03549	26.867	11.97	9	11	568	62.0244	6.84424
21223745	3-hydroxybutyryl-CoA dehydrogenase [Streptomyces coelicolor A3(2)]	58.16	1	14	14	75	3.24681e+08	0.996652	0.996531	1.00539	241.004	58.16	28	75	282	30.0845	5.32568
21220560	hypothetical protein SCO2080 [Streptomyces coelicolor A3(2)]	32.64	1	6	6	18	3.00454e+07	0.996362	0.943334	1.05538	49.8503	32.64	12	18	239	25.2411	6.80029
21224722	phenylhydantoinase [Streptomyces coelicolor A3(2)]	43.47	1	12	12	47	3.84359e+07	0.996023	1.23796	0.817134	157.851	43.47	23	47	467	50.7161	5.50342
21221231	hypothetical protein SCO2780 [Streptomyces coelicolor A3(2)]	42.41	1	11	11	53	1.23605e+08	0.996	1.12677	0.881248	195.01	42.41	20	53	349	36.6199	5.31299
21224151	hypothetical protein SCO5806 [Streptomyces coelicolor A3(2)]	69.8	1	9	9	96	6.66666e+08	0.995832	1.05987	0.945063	284.26	69.8	18	96	202	21.3675	5.18604
21222227	branched-chain alpha-keto acid dehydrogenase E1 subunit alpha, partial [Streptomyces coelicolor A3(2)]	22.78	1	7	7	23	3.44977e+07	0.99582	1.08773	0.89219	61.5089	22.78	13	23	417	45.3972	5.38916
21223634	hypothetical protein SCO5267 [Streptomyces coelicolor A3(2)]	73.77	1	5	5	18	1.67431e+08	0.995707	0.965212	1.05233	56.4377	73.77	9	18	61	7.41753	4.11963
21222728	marR-family protein [Streptomyces coelicolor A3(2)]	12.41	1	1	1	4	1.25007e+07	0.99552	1.19205	0.835097	17.9412	12.41	2	4	145	16.1095	8.77783
21223164	GMP synthase [Streptomyces coelicolor A3(2)]	55.13	1	24	24	146	2.17203e+08	0.995429	0.933636	1.069	493.992	55.13	46	146	526	56.5777	4.85596
21220030	hypothetical protein SCO1530 [Streptomyces coelicolor A3(2)]	44.09	1	5	5	17	7.3496e+07	0.994896	1.04484	0.972924	49.1074	44.09	9	17	186	19.9279	6.31592
21223108	DNA-directed RNA polymerase subunit alpha [Streptomyces coelicolor A3(2)]	59.41	1	18	18	132	7.31993e+08	0.994838	1.05846	0.936602	416.335	59.41	36	132	340	36.673	4.79248
21219403	peptide deformylase [Streptomyces coelicolor A3(2)]	6.88	1	1	1	2	0	0.994771	1.09694	0.906823	6.66238	6.88	2	2	218	23.1841	5.80811
21225355	hypothetical protein SCO7072 [Streptomyces coelicolor A3(2)]	41.71	1	6	6	25	3.7778e+07	0.994697	1.15958	0.87273	101.684	41.71	11	25	199	20.3324	4.85596
21220613	hypothetical protein SCO2136 [Streptomyces coelicolor A3(2)]	5.48	1	2	2	2	1.60121e+07	0.99437	0.875423	1.13583	3.89289	5.48	2	2	347	37.2061	9.39307
21222637	hypothetical protein SCO4242 [Streptomyces coelicolor A3(2)]	2.56	1	1	1	2	0	0.99398	0.830394	1.19695	4.10532	2.56	2	2	468	48.5143	7.92822
21223878	branched-chain amino acid aminotransferase [Streptomyces coelicolor A3(2)]	47.79	1	12	12	84	2.5527e+08	0.993928	0.997076	0.969364	266.795	47.79	22	84	362	39.2087	5.35107
21219894	PTS system sugar phosphotransferase component IIA [Streptomyces coelicolor A3(2)]	48.99	1	5	5	27	5.16914e+08	0.993879	1.06962	0.898455	85.8899	48.99	10	27	149	15.2279	4.66553
21221546	lipoprotein [Streptomyces coelicolor A3(2)]	3.88	1	1	1	4	2.20348e+07	0.993864	1.14562	0.867501	6.72694	3.88	2	4	258	27.4045	6.02393
21222442	hypothetical protein SCO4039 [Streptomyces coelicolor A3(2)]	37.91	1	4	4	17	6.22409e+07	0.993494	1.17975	0.819078	53.42	37.91	8	17	182	19.1528	3.75146
21220984	hypothetical protein SCO2523 [Streptomyces coelicolor A3(2)]	4.92	1	1	1	2	0	0.993227	1.04133	0.953771	5.55212	4.92	2	2	305	33.6129	5.12256
21224429	phosphoadenosine phosphosulfate reductase [Streptomyces coelicolor A3(2)]	2.54	1	1	1	2	4812123	0.993123	1.05635	0.940109	4.47377	2.54	2	2	236	25.941	5.13525
21225280	hypothetical protein SCO6994 [Streptomyces coelicolor A3(2)]	0.55	1	1	1	1	4.12027e+07	0.993111	1.29798	0.765088	0	0.55	1	1	1086	113.182	10.4331
21219588	hydrogenase [Streptomyces coelicolor A3(2)]	5.45	1	2	2	8	7.30315e+06	0.992756	0.87869	1.16196	21.3239	5.45	4	8	422	44.7982	8.83643
21222226	branched-chain alpha-keto acid dehydrogenase E1 subunit beta [Streptomyces coelicolor A3(2)]	39.57	1	11	11	50	8.0863e+07	0.992725	1.03221	0.959672	159.643	39.57	20	50	326	35.7225	5.57959
32141341	cyclase [Streptomyces coelicolor A3(2)]	7.5	1	1	1	2	1.68812e+07	0.992682	0.951107	1.04367	0	7.5	1	2	440	47.7625	5.43994
21220649	nicotinate-nucleotide--dimethylbenzimidazole phosphoribosyltransferase [Streptomyces coelicolor A3(2)]	11.48	1	2	3	11	2.80292e+07	0.992342	1.17363	0.865211	35.4554	11.48	6	11	357	36.9282	4.88135
21223836	oligopeptide ABC transporter ATP-binding protein [Streptomyces coelicolor A3(2)]	3.01	1	1	1	4	1.92089e+07	0.99232	0.877668	1.13059	9.90771	3.01	2	4	365	40.3108	6.75635
21222204	hypothetical protein SCO3793 [Streptomyces coelicolor A3(2)]	9.92	1	2	2	6	5.50429e+07	0.992194	0.823933	1.19053	9.11267	9.92	3	6	121	13.6241	7.06396
21220074	arginine repressor [Streptomyces coelicolor A3(2)]	3.91	1	1	1	2	3.37587e+06	0.992056	0.868337	1.14243	2.34975	3.91	2	2	179	19.2121	6.1001
21219030	peptide synthetase [Streptomyces coelicolor A3(2)]	8.67	1	23	24	87	3.45525e+07	0.991898	1.00839	0.981776	271.887	8.67	47	87	3643	389.546	5.65576
21221631	fructose-specific permease [Streptomyces coelicolor A3(2)]	17.02	1	8	8	40	1.0698e+08	0.991458	0.82095	1.24787	152.668	17.02	16	40	699	70.0844	5.26221
21222073	aminotransferase [Streptomyces coelicolor A3(2)]	7.32	1	3	3	10	1.53333e+07	0.991344	0.761092	1.3103	26.5833	7.32	6	10	396	42.759	5.50342
21221628	hypothetical protein SCO3193 [Streptomyces coelicolor A3(2)]	8.62	1	2	2	3	2.03882e+07	0.991339	1.10908	0.893804	9.29258	8.62	3	3	348	34.2268	5.36377
21220366	hypothetical protein SCO1878 [Streptomyces coelicolor A3(2)]	10.57	1	3	3	8	3.25515e+07	0.991081	0.917326	1.07727	20.0769	10.57	4	8	265	28.6341	6.53662
21223949	tRNA (guanine-N(1)-)-methyltransferase [Streptomyces coelicolor A3(2)]	2.17	1	1	1	4	5.4732e+06	0.991025	0.99482	0.996144	6.12993	2.17	2	4	277	30.8085	5.5415
21220006	30S ribosomal protein S4 [Streptomyces coelicolor A3(2)]	60.29	1	15	15	131	1.23896e+09	0.990907	1.02455	0.965578	355.288	60.29	30	131	204	23.5967	10.1548
21223675	hypothetical protein SCO5312 [Streptomyces coelicolor A3(2)]	36.81	1	4	4	18	3.08026e+07	0.990727	1.08872	0.954774	59.3281	36.81	8	18	144	15.577	5.35107
21222074	hypothetical protein SCO3659 [Streptomyces coelicolor A3(2)]	57.87	1	8	8	52	2.88827e+08	0.990591	1.04114	0.972163	185.497	57.87	15	52	178	20.3689	4.51318
21221625	mechanosensitive channel [Streptomyces coelicolor A3(2)]	8.97	1	1	1	6	1.82836e+07	0.990509	0.989502	0.977884	25.2447	8.97	2	6	156	16.7088	7.13721
21219942	6,7-dimethyl-8-ribityllumazine synthase [Streptomyces coelicolor A3(2)]	55.28	1	8	8	54	2.14687e+08	0.990489	1.07021	0.870971	166.618	55.28	16	54	161	16.7747	5.021
32141228	thiosulfate sulfurtransferase [Streptomyces coelicolor A3(2)]	72.24	1	24	24	257	1.57343e+09	0.990306	0.976466	1.00928	711.321	72.24	45	257	281	31.7519	4.93213
21221834	hypothetical protein SCO3407 [Streptomyces coelicolor A3(2)]	43.47	1	12	12	52	1.06486e+08	0.990213	0.946509	1.06596	150.393	43.47	24	52	375	41.2174	6.55127
21224212	hypothetical protein SCO5869 [Streptomyces coelicolor A3(2)]	52	1	10	10	46	1.14522e+08	0.990036	0.985188	1.02324	130.396	52	19	46	250	26.9067	4.53857
21220604	glucokinase [Streptomyces coelicolor A3(2)]	27.76	1	6	6	28	1.01284e+08	0.989956	0.950025	1.02605	91.855	27.76	11	28	317	33.0411	6.55127
21220864	oxidoreductase [Streptomyces coelicolor A3(2)]	2.75	1	1	1	6	1.04671e+07	0.989688	0.949094	1.04273	20.03	2.75	2	6	364	38.6878	5.46533
21225827	ABC transporter solute binding lipoprotein [Streptomyces coelicolor A3(2)]	3.29	1	1	1	1	0	0.989109	0.915044	1.0809	0	3.29	1	1	516	55.806	9.39307
21222576	hypothetical protein SCO4179 [Streptomyces coelicolor A3(2)]	81.15	1	11	11	65	2.51762e+08	0.988991	1.07534	0.943644	211.126	81.15	21	65	191	21.6807	4.97021
21223107	30S ribosomal protein S11 [Streptomyces coelicolor A3(2)]	44.78	1	5	5	27	4.69509e+08	0.98886	1.06259	0.966144	64.1529	44.78	10	27	134	14.3896	11.5317
32141230	phosphate transport system regulator, partial [Streptomyces coelicolor A3(2)]	13.1	1	3	3	8	3.96554e+07	0.988493	0.959008	1.01892	23.9641	13.1	6	8	229	25.4412	5.12256
21222350	cytochrome oxidase subunit I [Streptomyces coelicolor A3(2)]	21.76	2	7	7	38	1.60091e+08	0.988447	0.905078	1.14112	115.368	21.76	14	38	501	55.8502	8.63135
32141243	DNA-directed RNA polymerase subunit beta' [Streptomyces coelicolor A3(2)]	62.05	1	75	75	441	5.12894e+08	0.988386	1.05519	0.925169	1497.77	62.05	148	441	1299	144.514	6.85889
21219709	acyl-CoA dehydrogenase [Streptomyces coelicolor A3(2)]	2.54	1	1	1	4	2.03283e+07	0.988235	1.02084	0.968018	14.0609	2.54	2	4	393	43.3234	5.47803
32141134	xylulose kinase [Streptomyces coelicolor A3(2)]	11.85	1	4	4	10	3.12921e+07	0.988198	1.05494	0.938058	30.5056	11.85	8	10	481	49.6516	5.23682
21221753	hypothetical protein SCO3322 [Streptomyces coelicolor A3(2)]	12.42	1	3	3	10	2.13231e+07	0.988181	0.864166	1.19119	33.1609	12.42	6	10	298	32.0155	7.72314
21221317	hypothetical protein SCO2868 [Streptomyces coelicolor A3(2)]	7.55	1	1	1	4	2.68154e+07	0.988072	1.08379	0.911647	13.0661	7.55	2	4	159	18.1268	5.08447
21222659	oxidoreductase [Streptomyces coelicolor A3(2)]	65.34	1	12	12	60	1.77545e+08	0.988002	1.19291	0.837083	227.276	65.34	23	60	326	32.9854	5.89697
21221493	acyl-CoA dehydrogenase [Streptomyces coelicolor A3(2)]	30.65	1	10	10	46	7.49641e+07	0.987961	1.02886	0.95438	175.048	30.65	19	46	385	41.4418	5.43994
21221448	preprotein translocase subunit SecA [Streptomyces coelicolor A3(2)]	40.02	1	30	30	121	1.06592e+08	0.987947	0.84893	1.18894	403.672	40.02	58	121	947	106.391	5.10986
32141222	hypothetical protein SCO3964, partial [Streptomyces coelicolor A3(2)]	11.76	1	7	7	27	71983194	0.98776	0.886801	1.1116	79.9709	11.76	14	27	680	69.2436	9.67139
21221773	hypothetical protein SCO3343 [Streptomyces coelicolor A3(2)]	8.87	1	1	1	4	8.45269e+06	0.987713	1.08825	0.907581	13.4	8.87	2	4	124	13.0453	6.59521
21220104	serine protease membrane protein [Streptomyces coelicolor A3(2)]	8.65	1	1	1	1	31053224	0.987376	0.803221	1.22922	0	8.65	1	1	393	40.2824	5.56689
21220720	hypothetical protein SCO2250 [Streptomyces coelicolor A3(2)]	2.91	1	1	1	2	0	0.987277	1.04348	0.946103	1.9434	2.91	2	2	275	29.818	4.76709
21224590	2-oxoglutarate ferredoxin oxidoreductase subunit beta [Streptomyces coelicolor A3(2)]	26.57	2	6	6	24	1.1983e+08	0.987232	0.991248	0.93693	79.2232	26.57	12	24	350	37.7841	6.22705
21223780	cholesterol esterase [Streptomyces coelicolor A3(2)]	29.77	1	5	5	24	8.50528e+07	0.986817	1.20727	0.851078	83.2777	29.77	10	24	215	22.3044	8.68994
21223287	aldehyde dehydrogenase [Streptomyces coelicolor A3(2)]	1.67	1	1	1	4	6.92451e+06	0.986791	1.00358	0.983234	11.8845	1.67	2	4	480	51.2955	5.69385
21222653	hydrolytic protein [Streptomyces coelicolor A3(2)]	13.2	3	1	4	12	2.30226e+07	0.986763	0.937222	1.05282	41.6146	13.2	8	12	485	52.5645	5.33838
21223461	actinorhodin polyketide synthase bifunctional cyclase/dehydratase [Streptomyces coelicolor A3(2)]	80.06	1	25	25	320	2.29435e+09	0.986712	1.05736	0.923461	1209.4	80.06	50	320	316	34.6438	6.39209
21221830	GTP cyclohydrolase I [Streptomyces coelicolor A3(2)]	23.88	1	3	3	8	2.83685e+07	0.986706	1.03297	0.898558	26.2786	23.88	6	8	201	22.4005	5.49072
21221615	molybdenum cofactor biosynthesis protein [Streptomyces coelicolor A3(2)]	31.84	1	5	5	20	7.17608e+07	0.986613	0.999341	0.987568	63.4287	31.84	10	20	179	17.6953	5.98584
32141170	sugar kinase [Streptomyces coelicolor A3(2)]	18.67	1	6	6	36	6.75308e+07	0.986604	0.968466	1.02976	132.724	18.67	11	36	482	49.3426	5.19873
21223915	NAD(P)H-dependent glycerol-3-phosphate dehydrogenase [Streptomyces coelicolor A3(2)]	28.87	1	9	9	35	59667245	0.986541	1.01574	0.954719	109.57	28.87	17	35	336	34.6669	6.25244
21220807	hypothetical protein SCO2339 [Streptomyces coelicolor A3(2)]	33.75	1	6	6	24	4.14415e+07	0.986277	1.17976	0.874676	64.571	33.75	11	24	160	17.0213	5.17334
21223926	hypothetical protein SCO5570 [Streptomyces coelicolor A3(2)]	39.63	1	5	5	19	4.8266e+07	0.986225	0.985708	1.03548	59.3558	39.63	9	19	217	23.5254	4.4751
21223506	N-succinyldiaminopimelate aminotransferase [Streptomyces coelicolor A3(2)]	24.11	1	5	5	26	6.28429e+07	0.986218	1.03351	0.957241	100.3	24.11	10	26	365	39.3915	6.34131
21223727	F0F1 ATP synthase subunit A [Streptomyces coelicolor A3(2)]	2.56	1	1	1	4	5.07553e+07	0.986122	0.937317	1.05202	10.8884	2.56	2	4	273	30.597	7.53271
21218905	hypothetical protein SCO0361 [Streptomyces coelicolor A3(2)]	5.9	1	2	2	4	5.95279e+06	0.986046	1.06612	0.924852	13.1167	5.9	4	4	390	41.1183	5.12256
21223091	30S ribosomal protein S17 [Streptomyces coelicolor A3(2)]	63.16	1	7	7	61	9.62159e+08	0.985979	0.888485	1.09591	180.761	63.16	14	61	95	10.7138	9.90576
21223484	ABC transporter lipoprotein BldKB [Streptomyces coelicolor A3(2)]	70.33	1	35	35	312	1.18233e+09	0.985936	1.01362	0.966486	1022.15	70.33	69	312	600	65.4926	5.51611
21221980	hypothetical protein SCO3561 [Streptomyces coelicolor A3(2)]	2.09	1	1	1	3	34700350	0.985928	1.20459	0.824717	3.40534	2.09	1	3	431	47.0873	8.35303
21223647	alpha-ketoglutarate decarboxylase [Streptomyces coelicolor A3(2)]	58.02	2	56	56	357	5.60499e+08	0.98581	1.03173	0.948639	1143.1	58.02	107	357	1272	139.121	6.32861
21225030	metallopeptidase [Streptomyces coelicolor A3(2)]	1.98	1	1	1	4	0	0.985807	0.877493	1.12339	11.6698	1.98	2	4	506	54.8813	5.80811
21219945	riboflavin synthase subunit alpha [Streptomyces coelicolor A3(2)]	16.5	1	3	3	8	2.14701e+07	0.98568	1.08318	0.927813	22.7903	16.5	6	8	200	21.056	4.95752
21223300	propionyl-CoA carboxylase complex B subunit [Streptomyces coelicolor A3(2)]	32.26	1	13	13	60	1.01346e+08	0.985539	0.961324	1.03655	206.813	32.26	24	60	530	57.1239	5.26221
21221831	cell division protein FtsH-like protein [Streptomyces coelicolor A3(2)]	50.75	1	27	27	126	1.71313e+08	0.985374	0.848321	1.18786	481.888	50.75	54	126	668	72.0485	5.75732
21223360	D-amino acid deaminase [Streptomyces coelicolor A3(2)]	10.85	1	2	2	8	1.96294e+07	0.985244	1.05922	0.905258	33.1057	10.85	4	8	433	46.3536	5.41455
21222434	integral membrane transport protein [Streptomyces coelicolor A3(2)]	6.29	1	3	3	14	4.19861e+07	0.984991	0.912006	1.05783	49.8486	6.29	6	14	859	87.6498	5.74463
21219681	xylose isomerase [Streptomyces coelicolor A3(2)]	40.05	1	12	12	53	8.77106e+07	0.984874	1.01812	0.96988	183.425	40.05	23	53	387	42.8915	5.24951
21223719	50S ribosomal protein L31 [Streptomyces coelicolor A3(2)]	78.38	1	5	5	27	2.43958e+08	0.984345	1.0314	0.961775	66.5936	78.38	10	27	74	8.11399	8.80713
21222859	hypothetical protein SCO4472 [Streptomyces coelicolor A3(2)]	27.8	1	5	5	22	1.40863e+08	0.984176	0.847311	1.14447	78.7796	27.8	10	22	223	23.6561	9.33447
32141261	transcription termination factor Rho [Streptomyces coelicolor A3(2)]	35.3	2	18	18	74	6.4084e+07	0.984119	0.876436	1.10332	253.308	35.3	36	74	694	75.1326	9.02686
21223722	hypothetical protein SCO5362 [Streptomyces coelicolor A3(2)]	27.91	1	5	5	28	4.57974e+07	0.98399	1.03861	0.932431	101.349	27.91	10	28	215	22.6706	4.7417
21224027	regulatory protein [Streptomyces coelicolor A3(2)]	2.36	1	1	2	5	2.88505e+07	0.983496	1.00444	0.97911	11.1024	2.36	3	5	552	57.269	6.26514
21220135	peptidyl-prolyl cis-trans isomerase [Streptomyces coelicolor A3(2)]	46.57	1	15	15	78	1.32553e+08	0.98348	0.941051	1.02131	202.774	46.57	30	78	335	34.9149	5.35107
21220927	ABC transporter [Streptomyces coelicolor A3(2)]	5.3	1	2	2	6	2.2273e+07	0.983262	0.903534	1.08819	18.5439	5.3	4	6	642	69.4	5.71924
21219062	cold shock protein [Streptomyces coelicolor A3(2)]	74.63	2	3	3	26	2.5525e+08	0.98323	1.81322	0.511651	127.3	74.63	6	26	67	7.17442	4.80518
21224391	oxidoreductase [Streptomyces coelicolor A3(2)]	51.85	1	6	6	34	9.40841e+07	0.983211	1.05928	0.927663	128.761	51.85	12	34	135	15.1421	5.05908
21221869	pyridine nucleotide-disulfide oxidoreductase [Streptomyces coelicolor A3(2)]	11.67	1	4	4	12	1.7671e+07	0.983102	0.965649	1.00687	29.6142	11.67	8	12	454	47.8569	5.68115
21223758	hypothetical protein SCO5398 [Streptomyces coelicolor A3(2)]	65.75	1	8	8	62	5.42399e+08	0.982916	1.00089	0.991164	195.614	65.75	16	62	146	16.0719	5.10986
21221962	DNA topoisomerase I [Streptomyces coelicolor A3(2)]	25.42	1	19	19	78	4.10655e+07	0.982824	0.877757	1.09799	246.644	25.42	36	78	952	103.522	8.77783
21220709	NAD(+) synthase (glutamine-hydrolysing) [Streptomyces coelicolor A3(2)]	35.24	1	13	13	80	9.54576e+07	0.982673	0.897844	1.08049	255.114	35.24	26	80	613	66.1307	5.57959
21221306	hypothetical protein SCO2856 [Streptomyces coelicolor A3(2)]	5.26	1	1	1	1	5.47564e+06	0.982662	1.08489	0.905733	2.29955	5.26	1	1	152	16.2018	4.64014
21222470	phosphoribosylamine--glycine ligase [Streptomyces coelicolor A3(2)]	47.6	1	11	11	53	5.07049e+07	0.982523	1.01023	0.971571	199.369	47.6	22	53	416	42.5968	4.94482
21224064	hypothetical protein SCO5717 [Streptomyces coelicolor A3(2)]	2.03	1	2	2	8	2.2844e+07	0.982237	0.702069	1.38715	27.9823	2.03	4	8	1083	112.015	4.53857
21219245	hypothetical protein SCO0719 [Streptomyces coelicolor A3(2)]	5.7	1	1	1	4	1.7101e+07	0.982034	1.00497	0.97714	11.5637	5.7	2	4	158	16.4334	3.90381
21219029	ABC transporter [Streptomyces coelicolor A3(2)]	1.48	1	1	1	2	0	0.981997	0.960835	1.02198	3.57323	1.48	1	2	540	57.2529	7.6792
21223928	ribonuclease III [Streptomyces coelicolor A3(2)]	44.49	1	9	9	33	9.01361e+07	0.981947	0.895281	1.04618	113.394	44.49	18	33	272	28.7108	5.16064
21221396	malate oxidoreductase [Streptomyces coelicolor A3(2)]	31.85	1	9	9	37	1.07175e+08	0.981807	0.914312	1.098	131.53	31.85	18	37	471	48.6313	5.14795
21220992	PhoH-like protein [Streptomyces coelicolor A3(2)]	20.89	1	6	6	25	4.67461e+07	0.981562	0.828477	1.19791	84.8662	20.89	12	25	359	39.1223	7.13721
21224654	exonuclease [Streptomyces coelicolor A3(2)]	37.07	1	6	6	32	8.52884e+07	0.98151	1.02764	0.950933	117.486	37.07	12	32	259	28.4133	5.51611
32141258	magnesium chelatase [Streptomyces coelicolor A3(2)]	2.27	1	1	1	2	3.00998e+07	0.981493	0.863957	1.136	4.12045	2.27	1	2	309	34.143	5.19873
21220014	adenine phosphoribosyltransferase [Streptomyces coelicolor A3(2)]	19.39	1	2	2	6	4.86726e+07	0.981362	1.13952	0.861169	17.4716	19.39	3	6	165	16.6939	4.65283
21223565	hypothetical protein SCO5196 [Streptomyces coelicolor A3(2)]	5.31	1	1	1	1	6.91134e+06	0.981359	1.10337	0.889382	0	5.31	1	1	226	23.9941	7.37158
21222143	cold-shock protein [Streptomyces coelicolor A3(2)]	74.63	1	2	4	29	1.27699e+09	0.981012	1.26839	0.787826	94.8553	74.63	8	29	67	7.1855	4.88135
21221057	hypothetical protein SCO2599 [Streptomyces coelicolor A3(2)]	14.48	1	16	16	72	3.96171e+07	0.980958	0.858636	1.1522	271.003	14.48	32	72	1340	140.331	5.59229
21220634	aminotransferase [Streptomyces coelicolor A3(2)]	15.43	1	4	5	15	1.1759e+08	0.980885	0.94552	1.00252	53.5129	15.43	9	15	460	47.9848	5.74463
32141188	hypothetical protein SCO2999 [Streptomyces coelicolor A3(2)]	48.46	4	64	64	301	1.58224e+08	0.980863	1.02653	0.964167	976.973	48.46	126	301	1653	183.637	5.42725
21225836	oxidoreductase [Streptomyces coelicolor A3(2)]	1.8	1	1	1	3	4.89786e+06	0.980807	0.804593	1.21896	6.53299	1.8	2	3	998	106.626	6.25244
21222627	transcriptional factor regulator [Streptomyces coelicolor A3(2)]	6.25	1	1	1	4	5.79151e+06	0.980758	0.873562	1.12266	10.3376	6.25	2	4	160	17.8185	5.70654
21222139	stress response protein [Streptomyces coelicolor A3(2)]	77.84	1	9	9	42	1.68992e+08	0.980746	0.95634	1.01473	131.673	77.84	17	42	194	20.1732	5.87158
21224786	hypothetical protein SCO6482 [Streptomyces coelicolor A3(2)]	63.27	1	9	9	44	1.81405e+08	0.980714	1.16792	0.848728	151.79	63.27	17	44	147	16.0822	4.99561
21220878	hypothetical protein SCO2411 [Streptomyces coelicolor A3(2)]	3.8	1	1	1	1	36179177	0.980646	0.972857	1.00796	0	3.8	1	1	184	19.5682	8.48486
21221298	hypothetical protein SCO2848 [Streptomyces coelicolor A3(2)]	5.7	1	1	1	4	1.5396e+07	0.980441	1.00024	0.980167	10.7253	5.7	2	4	158	17.1749	5.85889
21225574	thioredoxin reductase [Streptomyces coelicolor A3(2)]	2.15	1	1	1	2	0	0.980382	1.00958	0.971035	5.32294	2.15	2	2	558	59.6434	5.22412
21224541	phosphatase [Streptomyces coelicolor A3(2)]	25.13	1	3	3	18	3.45109e+07	0.980161	0.976728	0.968483	72.697	25.13	6	18	199	21.8942	6.65381
21223399	hypothetical protein SCO5026 [Streptomyces coelicolor A3(2)]	4.41	1	1	1	4	2.29879e+07	0.980127	1.04505	0.937835	5.08977	4.41	2	4	272	29.7741	5.51611
21225111	phosphoglyceromutase [Streptomyces coelicolor A3(2)]	17.81	1	7	7	21	2.51318e+07	0.979938	1.02975	0.97611	63.9507	17.81	13	21	511	53.3201	5.24951
21221452	hypothetical protein SCO3009 [Streptomyces coelicolor A3(2)]	29.92	1	5	5	26	1.23482e+08	0.979735	0.837571	1.15282	102.461	29.92	10	26	254	27.8765	7.60596
21220445	hydrolase [Streptomyces coelicolor A3(2)]	32.11	1	4	4	16	1.49859e+08	0.979721	1.08196	0.918186	68.3942	32.11	8	16	218	23.3795	5.36377
21220487	hypothetical protein SCO2005 [Streptomyces coelicolor A3(2)]	21.23	1	3	3	10	3.17701e+07	0.979066	1.02034	0.941199	31.0584	21.23	6	10	179	18.5214	7.54736
21221996	ion-transporting ATPase [Streptomyces coelicolor A3(2)]	4.57	1	2	2	8	24762702	0.979044	0.852365	1.20059	24.2461	4.57	4	8	481	50.9099	6.23975
21223566	hypothetical protein SCO5197 [Streptomyces coelicolor A3(2)]	4.38	1	1	1	2	6912115	0.979006	0.966043	1.01338	5.61362	4.38	2	2	251	27.2992	6.25244
21220835	hypothetical protein SCO2367 [Streptomyces coelicolor A3(2)]	73.82	1	9	10	134	7.69983e+08	0.978992	0.982329	1.00121	488.198	73.82	20	134	191	20.401	4.67822
32141160	lipoyltransferase [Streptomyces coelicolor A3(2)]	20.38	1	4	4	14	2.39049e+07	0.978941	1.03366	1.0288	53.0743	20.38	8	14	265	29.5993	5.47803
21221151	2-hydroxyacid dehydrogenase [Streptomyces coelicolor A3(2)]	5.15	1	1	1	8	61783230	0.978797	1.01621	0.99698	20.4075	5.15	2	8	330	34.6962	6.53662
21220437	hypothetical protein SCO1952 [Streptomyces coelicolor A3(2)]	13.31	1	3	3	10	1.85997e+07	0.978675	0.886682	1.21106	35.423	13.31	6	10	338	37.172	5.73193
21222942	electron transfer oxidoreductase [Streptomyces coelicolor A3(2)]	17.67	1	7	7	31	4.27449e+07	0.978478	0.923722	1.07915	78.8484	17.67	14	31	430	46.9541	7.91357
21222633	guanyltransferase [Streptomyces coelicolor A3(2)]	10.61	1	3	3	9	2.47921e+07	0.978183	0.955332	0.976907	19.9579	10.61	6	9	245	26.7676	5.96045
21225599	regulatory protein [Streptomyces coelicolor A3(2)]	40.13	1	7	7	47	7.32988e+07	0.978171	1.18117	0.801777	213.065	40.13	14	47	299	31.8089	5.50342
21223569	hypothetical protein SCO5200 [Streptomyces coelicolor A3(2)]	6.7	1	2	2	8	2.06208e+07	0.978132	1.02878	0.917347	9.13687	6.7	3	8	373	39.3526	6.7417
21222089	hypothetical protein SCO3676 [Streptomyces coelicolor A3(2)]	3.71	1	1	1	4	5.85632e+06	0.977661	0.756604	1.29211	14.1296	3.71	2	4	350	36.0584	8.86572
21220147	hypothetical protein SCO1651 [Streptomyces coelicolor A3(2)]	27.33	1	7	7	26	4.05553e+07	0.977654	0.887747	1.12263	82.4755	27.33	14	26	300	32.7495	6.80029
21222561	hypothetical protein SCO4163 [Streptomyces coelicolor A3(2)]	5.31	1	1	1	4	1.36279e+07	0.977272	0.785975	1.24334	16.2564	5.31	2	4	245	25.5214	4.67822
21221041	hypothetical protein SCO2582 [Streptomyces coelicolor A3(2)]	41.79	1	10	10	30	7.85513e+07	0.977135	0.920282	1.0385	77.8222	41.79	16	30	402	43.9001	6.39209
21219211	hypothetical protein SCO0682 [Streptomyces coelicolor A3(2)]	37.1	1	2	2	46	8.58684e+07	0.976996	1.77497	0.571403	211.407	37.1	3	46	124	13.427	5.84619
32141245	adenylate kinase [Streptomyces coelicolor A3(2)]	85.71	1	21	21	128	6.11282e+08	0.976856	1.04286	0.924645	531.53	85.71	40	128	217	23.9702	5.18604
21222582	hypothetical protein SCO4185 [Streptomyces coelicolor A3(2)]	9.52	1	3	3	12	2.7785e+07	0.976749	0.997729	0.971838	38.7324	9.52	6	12	336	35.1031	6.13818
21222930	lipoprotein [Streptomyces coelicolor A3(2)]	19.91	1	4	4	12	3.02722e+07	0.97667	0.912401	1.07861	38.4171	19.91	7	12	216	22.9804	4.69092
21223258	lipoprotein [Streptomyces coelicolor A3(2)]	42.65	1	7	11	64	1.72926e+08	0.976645	1.03988	0.942662	258.345	42.65	22	64	347	35.6862	5.10986
21221904	racemase [Streptomyces coelicolor A3(2)]	14.4	1	3	3	10	1.84326e+07	0.976389	1.28893	0.722947	22.7604	14.4	6	10	361	39.354	6.23975
21224941	solute-binding lipoprotein [Streptomyces coelicolor A3(2)]	3.18	1	2	2	7	4.65777e+06	0.97638	0.860907	1.1426	11.273	3.18	4	7	503	52.0446	5.24951
21224115	recombinase A [Streptomyces coelicolor A3(2)]	4.81	1	1	1	2	1.81403e+07	0.976193	0.714819	1.36559	9.00612	4.81	2	2	374	39.5577	6.31592
21220561	hypothetical protein SCO2081 [Streptomyces coelicolor A3(2)]	3.31	1	1	1	1	5.60974e+06	0.976144	0.924246	1.05611	2.05885	3.31	1	1	242	25.1287	5.30029
21224002	hypothetical protein SCO5651 [Streptomyces coelicolor A3(2)]	11.93	1	4	4	16	3.55339e+07	0.975925	1.07285	0.88911	47.6137	11.93	7	16	394	42.189	5.38916
21223171	hypothetical protein SCO4793 [Streptomyces coelicolor A3(2)]	1.73	2	1	1	1	119714	0.97586	0.86102	1.13333	1.65995	1.73	1	1	347	37.0723	10.1401
21220926	ABC transporter [Streptomyces coelicolor A3(2)]	5.03	1	2	2	3	1.15009e+07	0.975822	0.944393	1.03324	7.09676	5.03	3	3	577	62.7582	6.32861
21223729	F0F1 ATP synthase subunit B [Streptomyces coelicolor A3(2)]	45.11	1	8	8	41	1.21246e+08	0.975535	0.845322	1.16214	150.435	45.11	16	41	184	20.2006	5.03369
21223864	oxidoreductase [Streptomyces coelicolor A3(2)]	5.37	1	2	2	8	1.5379e+07	0.97551	1.03699	0.939216	23.6571	5.37	4	8	447	46.6894	6.96143
21220574	regulatory protein [Streptomyces coelicolor A3(2)]	29.67	1	5	5	18	3.28297e+07	0.975483	0.905346	1.08379	54.4829	29.67	10	18	337	36.6813	5.84619
32141145	hypothetical protein SCO1511 [Streptomyces coelicolor A3(2)]	12.96	1	4	4	20	3.61009e+07	0.975423	0.754805	1.22632	69.7635	12.96	8	20	355	40.2227	9.33447
21221221	acetolactate synthase [Streptomyces coelicolor A3(2)]	2.48	1	1	1	2	0	0.97527	0.957444	1.01858	3.07543	2.48	2	2	564	58.8817	5.42725
21224413	DNA polymerase III subunit epsilon [Streptomyces coelicolor A3(2)]	4.51	1	1	1	6	7.64501e+06	0.975035	1.05169	0.928194	17.0024	4.51	2	6	244	26.6838	5.85889
21224819	uvrA-like protein [Streptomyces coelicolor A3(2)]	2.51	1	2	2	4	8.5673e+06	0.974695	0.934192	1.04331	10.5581	2.51	4	4	796	84.9195	6.22705
21225061	1-deoxy-D-xylulose-5-phosphate synthase [Streptomyces coelicolor A3(2)]	5.79	1	3	3	6	1.66464e+07	0.974551	0.847235	1.15022	22.1591	5.79	6	6	656	69.503	5.8208
21225548	ion channel subunit [Streptomyces coelicolor A3(2)]	31.66	1	6	6	34	4.73002e+07	0.974516	1.01532	0.95852	127.104	31.66	12	34	319	34.6808	5.43994
21220669	hypothetical protein SCO2196 [Streptomyces coelicolor A3(2)]	28.63	1	6	6	26	4.7076e+07	0.974427	0.798951	1.2521	89.725	28.63	12	26	234	24.9858	11.019
21220267	hypothetical protein SCO1775 [Streptomyces coelicolor A3(2)]	68.25	1	12	12	84	5.3876e+08	0.974418	0.919248	1.04908	299.979	68.25	24	84	211	23.1828	4.84326
21223043	elongation factor Tu [Streptomyces coelicolor A3(2)]	81.86	2	25	25	587	4921138570	0.974269	1.07741	0.909242	2034.17	81.86	48	587	397	43.7535	5.12256
21221364	nicotinate phosphoribosyltransferase [Streptomyces coelicolor A3(2)]	23.44	1	8	8	33	5.44639e+07	0.97402	0.926304	1.06837	116.053	23.44	16	33	448	47.4074	5.19873
21223946	30S ribosomal protein S16 [Streptomyces coelicolor A3(2)]	78.42	1	11	11	89	1.08043e+09	0.973996	0.957205	0.989801	275.476	78.42	21	89	139	15.187	9.24658
21221070	nucleoside diphosphate kinase [Streptomyces coelicolor A3(2)]	59.12	1	6	6	23	3.76245e+08	0.973812	0.957244	1.0212	76.9489	59.12	11	23	137	15.101	5.57959
21222616	hypothetical protein SCO4220 [Streptomyces coelicolor A3(2)]	6.47	1	1	1	4	4.77649e+06	0.973751	0.887065	1.09768	7.99331	6.47	2	4	139	15.3348	4.95752
21223448	hypothetical protein SCO5077 [Streptomyces coelicolor A3(2)]	84.73	1	8	8	182	8.83943e+09	0.97371	1.09015	0.898086	710.439	84.73	16	182	131	14.4134	7.59131
21221827	dihydroneopterin aldolase [Streptomyces coelicolor A3(2)]	6.72	1	1	1	2	6.00564e+06	0.973673	0.874271	1.11365	0	6.72	2	2	119	12.9938	5.03369
21220852	hypothetical protein SCO2385 [Streptomyces coelicolor A3(2)]	22.94	1	4	4	11	3.05324e+07	0.973548	0.991405	0.993509	29.8585	22.94	8	11	218	23.4146	5.13525
21222035	hypothetical protein SCO3619 [Streptomyces coelicolor A3(2)]	32.17	1	4	4	15	3.52788e+07	0.973442	0.731355	1.33096	48.4135	32.17	7	15	115	11.722	4.48779
21223568	hypothetical protein SCO5199 [Streptomyces coelicolor A3(2)]	28.75	1	12	12	63	8.86259e+07	0.973419	0.968834	1.01634	181.197	28.75	23	63	487	51.7336	4.79248
21219079	hypothetical protein SCO0544 [Streptomyces coelicolor A3(2)]	1.57	1	1	1	1	3.57814e+06	0.973341	0.870043	1.11868	0	1.57	1	1	510	55.0946	10.1694
21223733	F0F1 ATP synthase subunit beta [Streptomyces coelicolor A3(2)]	56.69	1	21	21	149	2.52136e+08	0.973329	0.926218	1.0719	549.349	56.69	40	149	478	52.1455	4.89404
31340549	hypothetical protein SCO1816, partial [Streptomyces coelicolor A3(2)]	20.12	1	7	7	22	2.04351e+07	0.973064	0.981722	1.00715	66.8633	20.12	13	22	507	54.3761	5.12256
21223869	acetolactate synthase 3 regulatory subunit [Streptomyces coelicolor A3(2)]	14.37	1	2	2	6	3.18492e+07	0.972938	1.09993	0.884506	15.6792	14.37	4	6	174	19.1204	8.48486
21220556	isoleucyl-tRNA synthetase [Streptomyces coelicolor A3(2)]	23.3	2	16	17	62	1.32056e+08	0.972704	0.95648	1.01505	187.804	23.3	33	62	1047	116.813	5.24951
21223321	nitrate reductase subunit beta NarH3 [Streptomyces coelicolor A3(2)]	41.61	3	14	14	59	2.46374e+08	0.972644	0.787936	1.21849	184.794	41.61	26	59	548	59.8094	5.68115
21219941	phosphoribosyl-ATP pyrophosphatase [Streptomyces coelicolor A3(2)]	75.56	1	6	6	23	1.84752e+08	0.972624	0.977655	0.986202	64.0803	75.56	12	23	90	9.91296	5.021
21218765	hypothetical protein SCO0211 [Streptomyces coelicolor A3(2)]	4.2	1	1	1	2	60479090	0.972504	0.930167	1.04547	4.41581	4.2	1	2	238	24.9164	11.6489
21224091	hypothetical protein SCO5745 [Streptomyces coelicolor A3(2)]	52.41	1	22	22	118	1.62737e+08	0.972439	0.98452	0.967998	391.203	52.41	42	118	561	61.0261	6.53662
21223835	oligopeptide transport system integral membrane protein [Streptomyces coelicolor A3(2)]	3.31	1	1	1	4	1.65995e+07	0.972402	0.934615	1.04039	9.97996	3.31	2	4	332	35.8045	7.86963
21223036	DNA-directed RNA polymerase subunit beta [Streptomyces coelicolor A3(2)]	64.77	1	61	62	410	4.75983e+08	0.971803	1.04689	0.927585	1384.76	64.77	123	410	1161	128.414	4.98291
21220925	hypothetical protein SCO2461 [Streptomyces coelicolor A3(2)]	36.11	1	4	4	24	4.84606e+07	0.971794	0.655763	1.43767	74.4731	36.11	8	24	108	11.853	10.4478
21219585	two component system response regulator [Streptomyces coelicolor A3(2)]	10.41	1	1	1	1	44280831	0.971719	0.985505	0.98597	0	10.41	1	1	221	24.1199	5.17334
21223571	hypothetical protein SCO5202 [Streptomyces coelicolor A3(2)]	4.95	1	2	2	5	6.40292e+06	0.971675	0.808739	1.20142	13.522	4.95	3	5	364	38.1574	5.21143
21220100	transposase [Streptomyces coelicolor A3(2)]	2.42	1	1	1	1	1.15858e+07	0.971426	0.828805	1.17203	2.13792	2.42	1	1	414	45.694	9.81787
21225269	hypothetical protein SCO6983 [Streptomyces coelicolor A3(2)]	18.25	1	2	2	10	7.57006e+07	0.97123	0.939097	1.0055	35.473	18.25	4	10	137	14.6608	4.41162
21220359	aldehyde dehydrogenase [Streptomyces coelicolor A3(2)]	42.44	1	13	13	76	2.24227e+08	0.970986	0.916954	1.06942	295.589	42.44	26	76	509	52.2122	5.23682
21223190	hypothetical protein SCO4812 [Streptomyces coelicolor A3(2)]	16.98	1	2	2	16	2.01339e+07	0.970869	0.82304	1.11556	51.5613	16.98	4	16	265	28.0518	5.71924
21220122	cytochrome P450 [Streptomyces coelicolor A3(2)]	1.81	1	1	1	2	3.96752e+06	0.970853	1.14125	0.850658	5.98479	1.81	2	2	498	55.1237	6.12549
21221574	galactokinase [Streptomyces coelicolor A3(2)]	33.33	1	11	11	50	6.84585e+07	0.970638	0.98923	1.00402	168.204	33.33	22	50	387	40.7788	5.021
21224045	4-hydroxy-3-methylbut-2-en-1-yl diphosphate synthase [Streptomyces coelicolor A3(2)]	57.92	2	16	16	77	1.31162e+08	0.970594	0.958739	1.01176	268.579	57.92	31	77	385	40.7702	5.50342
21223341	hypothetical protein SCO4968 [Streptomyces coelicolor A3(2)]	28	1	1	1	6	23354951	0.970496	0.757029	1.26415	19.3048	28	2	6	75	7.98202	5.80811
21219081	pyruvate carboxylase [Streptomyces coelicolor A3(2)]	6.49	1	5	5	11	1.57221e+07	0.970452	0.85523	1.17219	27.1259	6.49	9	11	1124	120.997	5.50342
32141263	glycogen phosphorylase [Streptomyces coelicolor A3(2)]	55.38	2	34	34	156	2.23925e+08	0.970416	0.972894	0.985519	484.844	55.38	67	156	874	96.2698	6.354
21221403	bifunctional uroporphyrinogen-III synthetase/response regulator domain-containing protein [Streptomyces coelicolor A3(2)]	4.81	1	2	2	8	1.68485e+07	0.970365	1.18474	0.819881	18.7737	4.81	4	8	395	41.5243	7.25439
21222596	hypothetical protein SCO4200 [Streptomyces coelicolor A3(2)]	13.27	1	1	1	4	1.31497e+07	0.969952	0.857277	1.13139	14.5074	13.27	2	4	113	12.2936	10.3452
21222876	decarboxylase [Streptomyces coelicolor A3(2)]	11.96	1	4	4	10	2.87236e+07	0.969748	0.916686	1.06846	40.8294	11.96	7	10	485	53.8627	6.40479
21220015	preprotein translocase subunit SecF [Streptomyces coelicolor A3(2)]	10.72	1	3	3	14	2.32226e+07	0.969612	0.918111	1.05954	48.1321	10.72	6	14	373	39.686	7.06396
21220806	O-methyltransferase [Streptomyces coelicolor A3(2)]	23.32	1	5	5	20	3.51567e+07	0.969256	1.06725	0.918198	68.687	23.32	10	20	223	23.5853	5.07178
21224774	hypothetical protein SCO6470 [Streptomyces coelicolor A3(2)]	17.65	1	3	3	10	1.91835e+07	0.969169	0.817616	1.1914	26.1421	17.65	5	10	170	19.2416	7.2251
21221733	hypothetical protein SCO3301 [Streptomyces coelicolor A3(2)]	10.6	1	3	3	10	2.85048e+07	0.969046	0.783937	1.2208	37.6435	10.6	6	10	283	29.3048	8.96826
21222044	adenylosuccinate synthetase [Streptomyces coelicolor A3(2)]	34.66	1	12	12	71	2.94224e+08	0.969038	0.974497	0.98217	238.458	34.66	24	71	427	45.8057	5.52881
21219276	protease [Streptomyces coelicolor A3(2)]	2.29	1	1	1	1	22054547	0.969012	0.978794	0.989965	2.30016	2.29	1	1	437	42.1893	4.38623
21220626	Rieske iron-sulfur protein [Streptomyces coelicolor A3(2)]	37.68	1	8	8	36	7.47506e+07	0.968295	1.04613	0.952733	109.118	37.68	15	36	353	38.5497	5.43994
21223730	F0F1 ATP synthase subunit delta [Streptomyces coelicolor A3(2)]	33.21	1	6	6	22	3.59266e+07	0.968246	0.876036	1.11691	84.0249	33.21	12	22	274	29.1655	7.53271
21220380	lyase [Streptomyces coelicolor A3(2)]	23.85	1	2	2	8	2.35804e+07	0.968194	1.08721	0.867446	26.9539	23.85	4	8	130	14.3762	5.13525
21223417	fumarate hydratase class I [Streptomyces coelicolor A3(2)]	58.42	1	27	27	126	1.00547e+08	0.96816	0.906125	1.03841	439.389	58.42	54	126	558	60.7294	5.10986
21223589	polypeptide deformylase [Streptomyces coelicolor A3(2)]	32.87	1	6	6	28	1.12269e+08	0.968128	1.04285	0.960092	100.596	32.87	12	28	216	24.1687	4.86865
21222030	aspartate-semialdehyde dehydrogenase [Streptomyces coelicolor A3(2)]	9.94	1	2	2	8	2.80123e+07	0.967843	0.907092	1.06693	26.2716	9.94	4	8	362	37.9646	5.13525
21221617	molybdopterin biosynthesis protein [Streptomyces coelicolor A3(2)]	9.43	1	3	3	14	2.53066e+07	0.967825	0.935095	1.02597	39.2665	9.43	6	14	424	43.5284	4.85596
21222827	D-alanyl-D-alanine carboxypeptidase [Streptomyces coelicolor A3(2)]	6.49	1	6	6	23	1.9468e+07	0.967784	0.730479	1.33996	62.1976	6.49	12	23	832	84.1734	4.62744
21223512	DNA-3-methyladenine glycosylase I [Streptomyces coelicolor A3(2)]	13.4	1	2	2	6	2.32951e+07	0.967688	0.953237	1.01512	27.3901	13.4	4	6	194	21.0188	6.55127
21220596	D-lactate dehydrogenase [Streptomyces coelicolor A3(2)]	6.34	1	2	2	5	2.75988e+07	0.967682	0.965994	1.05083	17.3435	6.34	3	5	331	35.9945	5.37646
21219734	sugar-phosphate isomerase [Streptomyces coelicolor A3(2)]	7.89	1	1	1	2	6.02246e+06	0.967498	0.912794	1.05989	6.16497	7.89	2	2	152	16.3172	5.41455
21220904	transcriptional regulator [Streptomyces coelicolor A3(2)]	5.45	1	1	1	4	1.16409e+07	0.967483	0.596598	1.6216	15.9039	5.45	2	4	257	27.6796	6.69775
21223539	TetR family transcriptional regulator [Streptomyces coelicolor A3(2)]	4.69	1	1	1	8	1.1429e+07	0.966924	0.76212	1.26834	30.4082	4.69	2	8	213	23.3579	6.04932
21224218	potassium uptake protein [Streptomyces coelicolor A3(2)]	16.37	1	3	3	12	4.41747e+07	0.966889	0.986362	0.963796	44.9931	16.37	5	12	226	24.2736	4.55127
21221633	DeoR family transcriptional regulator [Streptomyces coelicolor A3(2)]	60.87	1	11	11	53	1.13791e+08	0.966869	0.942238	0.994994	174.152	60.87	21	53	253	26.9483	5.85889
21223731	F0F1 ATP synthase subunit alpha [Streptomyces coelicolor A3(2)]	60.49	1	26	26	147	4.94128e+08	0.966857	0.898671	1.07542	522.952	60.49	52	147	529	57.2211	5.07178
21222266	regulatory protein [Streptomyces coelicolor A3(2)]	42.67	1	10	10	40	7.63513e+07	0.966799	0.809944	1.23667	123.861	42.67	20	40	232	24.8459	9.45166
21223625	ATP-binding protein [Streptomyces coelicolor A3(2)]	2.37	1	1	1	4	5.15021e+06	0.966547	0.919217	1.05145	4.60078	2.37	2	4	253	27.7622	6.43018
21220654	dihydrolipoamide dehydrogenase [Streptomyces coelicolor A3(2)]	74.69	1	30	30	341	1.63913e+09	0.966427	1.0703	0.888851	1200.7	74.69	59	341	486	51.3648	6.34131
21222688	cold shock protein [Streptomyces coelicolor A3(2)]	46.27	1	3	4	34	1.08496e+09	0.965903	1.26612	0.73336	79.0519	46.27	8	34	67	7.38257	4.94482
21219665	helicase [Streptomyces coelicolor A3(2)]	5.04	1	4	4	13	1.55492e+07	0.965832	0.874934	1.08902	39.0117	5.04	7	13	854	95.4517	5.31299
21223609	hypothetical protein SCO5242 [Streptomyces coelicolor A3(2)]	4.61	1	1	1	2	4.49499e+06	0.965832	0.865439	1.11596	4.06761	4.61	2	2	152	15.2353	9.93506
21223029	transcription antitermination protein [Streptomyces coelicolor A3(2)]	38.67	1	9	9	61	2.85168e+08	0.965703	0.98481	0.948557	184.122	38.67	16	61	300	32.8249	4.09424
21218922	catalase [Streptomyces coelicolor A3(2)]	74.13	3	38	38	331	1.31976e+09	0.965623	0.875173	1.11161	1108.91	74.13	75	331	487	55.0821	6.26514
21223621	superoxide dismutase [Streptomyces coelicolor A3(2)]	34.35	1	6	6	51	7.2813e+08	0.965272	1.08432	0.871241	123.731	34.35	12	51	131	14.6936	8.01611
21222290	inner membrane protein translocase component YidC [Streptomyces coelicolor A3(2)]	16.71	1	8	8	40	4.50338e+07	0.965192	0.778814	1.2342	105.055	16.71	15	40	431	47.3429	10.0815
21225890	starvation sensing protein [Streptomyces coelicolor A3(2)]	23	1	6	6	28	32940360	0.965185	1.0936	0.904496	93.9988	23	12	28	413	45.1778	5.88428
21220617	transcriptional regulator [Streptomyces coelicolor A3(2)]	45.16	1	3	3	18	2.99471e+08	0.964746	0.975747	1.00097	62.8657	45.16	6	18	93	10.0762	4.80518
32141161	hypothetical protein SCO2206, partial [Streptomyces coelicolor A3(2)]	29.32	1	4	4	16	9.73975e+07	0.964424	1.16149	0.826678	48.172	29.32	8	16	133	14.9746	5.09717
21220189	penicillin acylase [Streptomyces coelicolor A3(2)]	1.34	1	2	2	2	9.33899e+07	0.963978	1.09067	0.883807	1.93336	1.34	2	2	893	95.0834	5.23682
21225059	hypothetical protein SCO6766 [Streptomyces coelicolor A3(2)]	10.29	1	4	4	15	3.17468e+07	0.963701	0.920072	1.03299	36.2315	10.29	8	15	340	38.6244	8.04541
21223115	phosphoglucosamine mutase [Streptomyces coelicolor A3(2)]	37.61	1	11	11	47	5.67982e+07	0.963565	1.02034	0.967402	167.285	37.61	21	47	452	46.8671	5.24951
21220655	dihydrolipoamide succinyltransferase [Streptomyces coelicolor A3(2)]	45.76	2	24	24	280	1.70755e+09	0.963453	1.00593	0.96812	915.274	45.76	48	280	590	58.9999	4.66553
21221035	phosphoglycerate mutase [Streptomyces coelicolor A3(2)]	13.45	1	2	2	14	2.73177e+07	0.963434	0.96536	1.04061	49.8424	13.45	4	14	223	24.0804	5.80811
21219937	CbxX/CfqX family protein [Streptomyces coelicolor A3(2)]	4.53	1	1	1	1	0	0.963426	0.913116	1.05505	0	4.53	1	1	618	67.2574	5.43994
21219743	urease subunit alpha [Streptomyces coelicolor A3(2)]	14.83	1	5	5	18	3.86884e+07	0.963158	0.967911	1.00747	73.2773	14.83	10	18	573	60.5127	5.47803
21224070	regulator, BldB [Streptomyces coelicolor A3(2)]	59.18	1	4	4	24	1.41347e+08	0.963082	1.06842	0.94315	80.6262	59.18	8	24	98	10.8943	4.37354
21221612	acetyltransferase [Streptomyces coelicolor A3(2)]	18.63	1	2	2	6	1.90768e+07	0.962578	0.965545	1.00818	24.1134	18.63	4	6	161	17.9497	5.05908
21220517	tryptophan synthase subunit alpha [Streptomyces coelicolor A3(2)]	39.48	1	5	5	28	1.28097e+08	0.962575	1.05073	0.933136	96.6659	39.48	10	28	271	27.6923	5.04639
21222059	lipase/esterase [Streptomyces coelicolor A3(2)]	1.99	1	1	1	3	5.58845e+06	0.962548	0.941348	1.02248	6.50783	1.99	2	3	301	31.0658	4.95752
21222829	DNA-binding protein [Streptomyces coelicolor A3(2)]	3.39	1	1	1	2	1.24671e+07	0.96229	0.720818	1.33494	6.45223	3.39	2	2	295	33.5733	7.1958
21224358	fatty acid oxidation complex alpha-subunit [Streptomyces coelicolor A3(2)]	37.8	1	23	23	89	1.15097e+08	0.96229	1.18019	0.787511	276.755	37.8	44	89	709	75.2399	5.41455
21219367	hypothetical protein SCO0846 [Streptomyces coelicolor A3(2)]	8.65	1	2	2	6	1.73119e+07	0.961967	0.960564	1.00678	19.9342	8.65	4	6	266	28.5305	6.27783
21221781	DNA integrity scanning protein DisA [Streptomyces coelicolor A3(2)]	49.47	1	13	13	69	4.55498e+08	0.961964	0.979873	0.973786	287.509	49.47	26	69	374	40.0193	5.37646
32141256	hypothetical protein SCO5204 [Streptomyces coelicolor A3(2)]	26.7	1	22	22	93	5.67972e+07	0.961882	0.879905	1.08877	328.905	26.7	41	93	1000	109.487	5.97314
32141300	aminotransferase, partial [Streptomyces coelicolor A3(2)]	12.65	1	4	4	16	3.1675e+07	0.961169	1.05056	0.924987	46.0097	12.65	8	16	427	45.7755	6.53662
21222062	hypothetical protein SCO3647 [Streptomyces coelicolor A3(2)]	37.06	1	6	6	38	3.20852e+08	0.961116	1.24943	0.77666	148.294	37.06	12	38	143	15.5197	6.26514
32141148	bifunctional ornithine acetyltransferase/N-acetylglutamate synthase [Streptomyces coelicolor A3(2)]	38.38	2	13	13	54	3.79729e+08	0.961073	0.943025	1.00795	179.839	38.38	25	54	383	39.4879	4.89404
21223231	succinate dehydrogenase iron-sulfur subunit [Streptomyces coelicolor A3(2)]	40.47	1	10	10	44	7.35282e+07	0.960815	0.859576	1.16072	107.5	40.47	17	44	257	29.2827	5.80811
21219027	hypothetical protein SCO0489 [Streptomyces coelicolor A3(2)]	24.29	1	1	1	4	6.74928e+07	0.960766	1.07703	0.892011	16.3757	24.29	2	4	70	7.75269	4.50049
21220327	enoyl-CoA hydratase/isomerase [Streptomyces coelicolor A3(2)]	19.1	1	4	4	15	3.85254e+07	0.960662	1.04327	0.903265	48.414	19.1	8	15	267	28.1285	5.0083
21220406	hypothetical protein SCO1920 [Streptomyces coelicolor A3(2)]	17.31	1	2	2	6	2.09666e+07	0.960524	0.942033	1.01959	19.5167	17.31	4	6	156	17.0523	4.77979
21219109	peptidase E [Streptomyces coelicolor A3(2)]	6.17	1	2	2	9	8.9503e+06	0.96034	0.931292	1.04707	12.9342	6.17	4	9	243	26.2204	5.36377
21223850	NAD-dependent DNA ligase LigA [Streptomyces coelicolor A3(2)]	33.33	1	18	18	67	4.02884e+07	0.960292	0.924512	1.04492	230.089	33.33	36	67	735	80.5225	5.22412
21224344	solute-binding protein [Streptomyces coelicolor A3(2)]	79.78	1	31	31	226	6.55329e+08	0.959545	0.78119	1.22053	791.238	79.78	62	226	371	39.2229	5.47803
21221053	GTPase ObgE [Streptomyces coelicolor A3(2)]	2.51	1	1	1	4	4.90713e+06	0.959439	0.813067	1.17998	4.98988	2.51	2	4	478	51.0422	5.45264
21220566	UDP-N-acetylmuramoyl-L-alanyl-D-glutamate synthetase [Streptomyces coelicolor A3(2)]	23.14	1	9	9	32	5.90745e+07	0.959267	0.986063	0.943893	105.913	23.14	16	32	471	49.1133	5.42725
21222047	hypothetical protein SCO3632 [Streptomyces coelicolor A3(2)]	3.95	1	1	1	2	0	0.959062	0.932	1.02899	3.41877	3.95	1	2	152	17.0426	8.5874
21220067	oxidoreductase [Streptomyces coelicolor A3(2)]	35.71	1	9	9	34	6.11306e+07	0.958927	0.95038	0.998527	120.108	35.71	18	34	350	37.2537	5.35107
21220408	ABC transporter ATP-binding protein [Streptomyces coelicolor A3(2)]	47.24	1	12	12	67	3.91821e+08	0.958694	1.01021	0.952091	233.007	47.24	24	67	254	27.6342	5.41455
21223445	oxidoreductase [Streptomyces coelicolor A3(2)]	47.42	1	10	10	42	2.57495e+08	0.958518	0.883213	1.01103	160.447	47.42	20	42	329	34.0792	6.44287
21221417	peptide chain release factor 2 [Streptomyces coelicolor A3(2)]	53.53	1	15	16	75	7.55764e+07	0.958444	1.0634	0.924743	237.899	53.53	32	75	368	41.0595	4.86865
21219988	aspartate carbamoyltransferase catalytic subunit [Streptomyces coelicolor A3(2)]	1.84	2	1	1	2	362861565	0.958401	0.979199	0.978719	0	1.84	1	2	326	35.6394	6.63916
21223890	carboxyl transferase [Streptomyces coelicolor A3(2)]	14.8	1	6	6	11	7.30513e+06	0.958085	1.04067	0.920604	20.5446	14.8	10	11	527	56.8799	5.49072
21219256	transferase [Streptomyces coelicolor A3(2)]	2.04	1	1	1	1	2.36057e+07	0.957839	1.08434	0.883301	2.02243	2.04	1	1	393	41.5387	6.1001
21224013	adenosine deaminase [Streptomyces coelicolor A3(2)]	30.49	1	10	10	38	5.49574e+07	0.957467	1.05481	0.90838	105.745	30.49	18	38	387	42.4037	5.24951
21223834	oligopeptide-binding lipoprotein [Streptomyces coelicolor A3(2)]	70.33	1	46	46	370	1.32107e+09	0.957358	0.93938	1.02046	1069.92	70.33	88	370	600	65.2735	6.50732
21222409	long-chain-fatty-acid--CoA ligase [Streptomyces coelicolor A3(2)]	2.33	1	1	1	2	0	0.956899	0.925258	1.03415	4.88883	2.33	2	2	558	60.3566	5.40186
32141194	penicillin acylase, partial [Streptomyces coelicolor A3(2)]	4.7	1	4	4	14	1.2012e+07	0.956838	0.923216	1.03212	36.7624	4.7	8	14	936	102.448	5.5542
21223348	hypothetical protein SCO4975 [Streptomyces coelicolor A3(2)]	11.66	1	5	5	21	3.38963e+07	0.956615	0.947406	1.01402	63.4316	11.66	10	21	686	73.8827	5.021
21224026	4-aminobutyrate aminotransferase [Streptomyces coelicolor A3(2)]	50.9	1	15	15	64	7.73683e+07	0.956601	1.15178	0.842731	229.777	50.9	29	64	444	46.4499	5.41455
21219987	dihydroorotase [Streptomyces coelicolor A3(2)]	29.21	1	9	9	43	2.90127e+08	0.956332	0.99072	0.962308	98.3906	29.21	16	43	428	45.243	5.2749
21224723	oxidoreductase [Streptomyces coelicolor A3(2)]	2.94	1	1	1	2	5.41909e+06	0.956095	1.08549	0.880757	2.83062	2.94	2	2	340	36.8964	5.43994
21220782	hypothetical protein SCO2314 [Streptomyces coelicolor A3(2)]	10.03	1	3	3	26	8.1404e+07	0.955898	0.804271	1.18327	70.4167	10.03	6	26	289	29.105	4.88135
21222225	branched-chain alpha-keto acid dehydrogenase E2 [Streptomyces coelicolor A3(2)]	15.14	1	5	5	15	4.27059e+07	0.955673	1.0143	0.870814	65.0343	15.14	9	15	469	48.6917	6.06201
21221347	hypothetical protein SCO2900 [Streptomyces coelicolor A3(2)]	53.64	1	6	6	29	1.04954e+08	0.955383	0.773987	1.18119	90.9868	53.64	12	29	110	12.0075	9.86182
21224383	hypothetical protein SCO6052 [Streptomyces coelicolor A3(2)]	10.32	1	1	1	1	4.70323e+07	0.955012	0.645624	1.47915	0	10.32	1	1	465	50.1996	6.11279
21220168	hypothetical protein SCO1672 [Streptomyces coelicolor A3(2)]	2.62	1	1	1	2	4.16754e+06	0.954801	1.24576	0.766407	5.28721	2.62	2	2	267	29.4915	3.90381
21221702	GntR family transcriptional regulator [Streptomyces coelicolor A3(2)]	4.38	2	1	1	2	0	0.954793	0.973698	0.980543	2.27561	4.38	2	2	251	27.346	6.0874
21218938	epimerase/dehydratase [Streptomyces coelicolor A3(2)]	26.39	1	6	6	23	1.12198e+08	0.953854	1.35848	0.688646	74.8906	26.39	12	23	341	36.3877	5.64307
21223904	hydrolase [Streptomyces coelicolor A3(2)]	5.74	1	1	1	2	0	0.953745	0.917648	1.03929	3.49164	5.74	2	2	244	26.4803	4.94482
21225713	phosphoglucomutase [Streptomyces coelicolor A3(2)]	53.48	1	20	20	111	2.09045e+08	0.953687	1.03961	0.899749	416.517	53.48	39	111	546	57.452	5.5415
21221365	nicotinamidase [Streptomyces coelicolor A3(2)]	4.1	1	1	1	2	70324645	0.953366	0.912791	1.04441	4.66456	4.1	2	2	195	20.28	4.81787
21222639	hypothetical protein SCO4244 [Streptomyces coelicolor A3(2)]	25.92	1	11	11	51	6.00276e+07	0.953339	0.912427	1.03504	204.773	25.92	22	51	652	70.7622	5.35107
21225943	non-ribosomal peptide synthase [Streptomyces coelicolor A3(2)]	1.36	1	1	1	1	8.31935e+06	0.952954	0.996628	0.956139	0	1.36	1	1	1842	199.563	5.32568
21222228	two-component system response transcriptional regulator [Streptomyces coelicolor A3(2)]	7.8	1	1	2	10	1.59286e+08	0.952898	0.886096	1.07535	25.1241	7.8	4	10	218	23.6685	5.78271
21221077	trigger factor [Streptomyces coelicolor A3(2)]	63.89	1	26	26	168	5.45961e+08	0.952626	0.836742	1.12009	545.132	63.89	51	168	468	51.1368	4.41162
21224773	acyl-CoA dehydrogenase [Streptomyces coelicolor A3(2)]	6.98	1	3	3	7	1.37537e+07	0.952453	0.884098	1.03365	11.5717	6.98	5	7	401	44.2874	5.96045
21223236	hypothetical protein SCO4861 [Streptomyces coelicolor A3(2)]	18.23	1	2	2	8	3.70775e+07	0.952441	0.975824	0.975997	36.5324	18.23	4	8	181	18.877	4.13232
21220287	hypothetical protein SCO1796 [Streptomyces coelicolor A3(2)]	28.21	2	8	8	34	8.53752e+07	0.95228	0.921422	1.03812	101.449	28.21	16	34	319	34.6565	5.35107
21224617	hypothetical protein SCO6298 [Streptomyces coelicolor A3(2)]	10.39	1	3	3	9	9.27289e+06	0.952258	1.00908	1.0102	10.5116	10.39	6	9	308	33.053	5.14795
21223380	septum site-determining protein [Streptomyces coelicolor A3(2)]	4.58	1	1	1	2	148314913	0.952222	0.913656	1.04217	3.61042	4.58	1	2	131	13.5459	4.77979
21223817	enoyl-CoA hydratase [Streptomyces coelicolor A3(2)]	44.71	1	9	9	46	7.22515e+07	0.952077	0.996299	0.950803	149.209	44.71	18	46	255	27.1192	5.5415
21225989	hypothetical protein SCO7730 [Streptomyces coelicolor A3(2)]	44.64	1	4	5	18	9.48878e+07	0.951684	1.02373	0.946919	52.2314	44.64	8	18	112	12.2993	4.88135
21219666	acyl-CoA thioesterase II [Streptomyces coelicolor A3(2)]	21.18	1	4	4	14	2.30213e+07	0.951326	1.01614	0.935829	46.3647	21.18	8	14	288	32.4125	6.3667
21222191	sugar hydrolase [Streptomyces coelicolor A3(2)]	12.23	1	6	6	20	1.92817e+07	0.951172	0.89989	1.05622	65.6758	12.23	12	20	556	60.9887	5.12256
21220150	two-component response regulator [Streptomyces coelicolor A3(2)]	73.99	1	12	12	75	1.4813e+08	0.951123	1.09654	0.836965	257.639	73.99	24	75	223	24.1248	5.04639
21223901	hypothetical protein SCO5546 [Streptomyces coelicolor A3(2)]	23.75	1	4	4	16	3.53913e+07	0.951061	0.990715	0.963947	51.7051	23.75	7	16	261	28.1716	5.07178
21224197	hypothetical protein SCO5853 [Streptomyces coelicolor A3(2)]	42.32	1	5	5	24	3.00636e+07	0.950739	1.10631	0.84446	71.855	42.32	9	24	267	28.2841	5.57959
21221348	hypothetical protein SCO2901, partial [Streptomyces coelicolor A3(2)]	67.1	1	8	8	40	9.97257e+07	0.950716	0.961463	0.983386	141	67.1	15	40	155	16.8377	6.02393
21219017	hypothetical protein SCO0477 [Streptomyces coelicolor A3(2)]	57.69	1	4	4	16	3.91561e+07	0.95062	1.05028	0.938275	69.6859	57.69	8	16	130	14.0891	5.07178
21224264	hypothetical protein SCO5925 [Streptomyces coelicolor A3(2)]	7.23	1	1	1	1	0	0.950463	1.00641	0.944366	1.64403	7.23	1	1	83	9.38089	9.80322
21222594	DNA-binding protein [Streptomyces coelicolor A3(2)]	12.77	1	1	1	4	2.99876e+07	0.949845	1.09741	0.865496	19.3678	12.77	2	4	141	15.467	5.05908
21220789	hypothetical protein SCO2321 [Streptomyces coelicolor A3(2)]	31.98	1	9	10	40	2.73494e+08	0.949638	0.832156	1.16534	175.35	31.98	19	40	419	42.3881	4.98291
21222535	hypothetical protein SCO4137 [Streptomyces coelicolor A3(2)]	18.93	1	2	2	8	2.95295e+07	0.949616	0.853484	1.10181	41.003	18.93	4	8	206	23.2466	4.60205
21220932	reductase [Streptomyces coelicolor A3(2)]	73.16	1	22	22	133	4.27435e+08	0.949313	0.925344	1.04358	403.123	73.16	44	133	421	45.1982	5.85889
21225749	hypothetical protein SCO7481 [Streptomyces coelicolor A3(2)]	36.13	1	6	7	41	95358207	0.949223	1.08409	0.855848	144.243	36.13	14	41	191	20.1241	8.44092
21220424	hypothetical protein SCO1938 [Streptomyces coelicolor A3(2)]	33.9	1	9	11	53	7.78365e+07	0.94875	1.067	0.910678	193.706	33.9	22	53	351	37.6546	5.36377
21219955	hypothetical protein SCO1453 [Streptomyces coelicolor A3(2)]	58.71	1	14	14	89	4.02961e+08	0.948569	1.03435	0.915001	276.095	58.71	27	89	310	33.3274	5.94775
21220497	nucleotidase [Streptomyces coelicolor A3(2)]	2.99	1	2	2	6	3.81596e+06	0.94845	1.07683	0.902143	15.3985	2.99	4	6	602	64.9903	5.69385
21224150	vitamin B12-dependent ribonucleotide reductase [Streptomyces coelicolor A3(2)]	17.17	1	14	14	64	4.79782e+07	0.948061	0.952806	1.01413	213.758	17.17	28	64	967	105.218	5.50342
21223765	transcriptional regulator [Streptomyces coelicolor A3(2)]	27.22	1	5	5	26	4.02308e+07	0.947865	0.950187	0.975817	63.2326	27.22	10	26	158	18.3012	6.72705
21220495	two-component system response regulator [Streptomyces coelicolor A3(2)]	44.5	1	8	8	39	8.95743e+07	0.946661	1.06308	0.91844	140.802	44.5	16	39	218	24.1354	4.76709
21222933	hypothetical protein SCO4550 [Streptomyces coelicolor A3(2)]	5.26	1	1	1	4	2.25405e+07	0.946571	0.840665	1.12593	14.8983	5.26	2	4	399	44.1935	6.44287
21222268	DNA-binding protein [Streptomyces coelicolor A3(2)]	13.19	1	1	1	2	17657540	0.946388	0.756975	1.25017	9.24159	13.19	2	2	182	19.3019	6.81494
21221013	chaperone protein DnaJ [Streptomyces coelicolor A3(2)]	11.38	1	3	3	8	2.2652e+07	0.946388	0.887708	1.09304	14.6931	11.38	6	8	378	40.4632	6.65381
21223941	signal recognition particle protein [Streptomyces coelicolor A3(2)]	37.09	1	18	18	71	7.89293e+07	0.946024	0.83452	1.1437	252.688	37.09	36	71	550	59.1578	9.24658
21225066	peptidase [Streptomyces coelicolor A3(2)]	5.13	1	1	1	6	3.63809e+07	0.946011	1.18829	0.796075	20.5565	5.13	2	6	312	31.6138	9.21729
21222316	50S ribosomal protein L9 [Streptomyces coelicolor A3(2)]	67.57	1	12	12	74	4.00254e+08	0.945864	0.808329	1.10767	195.485	67.57	24	74	148	15.9587	9.59814
21220559	hypothetical protein SCO2079 [Streptomyces coelicolor A3(2)]	19.72	1	3	3	17	3.45325e+07	0.945621	1.12788	0.896939	64.1232	19.72	6	17	213	23.7088	5.37646
21224791	hypothetical protein SCO6487 [Streptomyces coelicolor A3(2)]	6.55	1	2	3	5	2.00173e+07	0.944995	0.96942	0.974765	5.60705	6.55	4	5	443	47.757	5.22412
21220019	Holliday junction DNA helicase RuvA [Streptomyces coelicolor A3(2)]	6.97	1	1	2	8	1.94592e+07	0.944765	0.807261	1.17029	20.0347	6.97	4	8	201	20.538	6.56592
21220268	CTP synthetase [Streptomyces coelicolor A3(2)]	33.88	1	13	13	59	9.39051e+07	0.944633	0.916041	1.03741	217.117	33.88	26	59	549	60.093	6.32861
21220136	hypothetical protein SCO1640 [Streptomyces coelicolor A3(2)]	24.94	1	11	11	42	1.82607e+08	0.944587	0.853739	1.12381	118.372	24.94	22	42	453	52.0639	8.74854
21220643	hypothetical protein SCO2169 [Streptomyces coelicolor A3(2)]	11.16	1	3	3	12	2.0975e+07	0.944414	0.713418	1.36528	40.5754	11.16	4	12	251	28.0333	11.5317
21222311	hypothetical protein SCO3904 [Streptomyces coelicolor A3(2)]	2.14	1	1	1	4	9153211	0.944334	0.786828	1.20013	9.24524	2.14	2	4	373	42.8828	8.63135
31340547	hypothetical protein SCO1793, partial [Streptomyces coelicolor A3(2)]	59.23	1	10	10	95	4.5077e+08	0.944248	0.957212	0.963396	362.944	59.23	20	95	260	28.4405	4.85596
21221391	sugar transporter sugar-binding protein [Streptomyces coelicolor A3(2)]	4.4	1	1	1	1	0	0.944218	1.10341	0.855689	0	4.4	1	1	432	44.8218	6.81494
21225675	hypothetical protein SCO7404 [Streptomyces coelicolor A3(2)]	32.32	3	5	5	16	1.14604e+08	0.943809	1.15585	0.795205	59.0481	32.32	10	16	263	28.5087	5.24951
21222527	hypothetical protein SCO4128 [Streptomyces coelicolor A3(2)]	2.73	1	1	2	4	1.19368e+07	0.94357	0.962233	0.980564	4.11124	2.73	3	4	513	56.9944	8.88037
21219265	hydrolase [Streptomyces coelicolor A3(2)]	11	1	1	1	3	5.76371e+07	0.942704	1.13829	0.82814	7.90441	11	2	3	209	22.3421	5.07178
21223894	hypothetical protein SCO5539 [Streptomyces coelicolor A3(2)]	7.14	1	1	1	4	27004283	0.942317	1.05423	0.893804	10.0612	7.14	2	4	140	14.6534	4.4751
21222265	peptidyl-prolyl cis-trans isomerase [Streptomyces coelicolor A3(2)]	15.82	1	2	2	6	28882423	0.942181	1.0589	0.878514	19.9651	15.82	4	6	177	19.4058	6.39209
21222326	cystathionine gamma-lyase [Streptomyces coelicolor A3(2)]	18.62	1	7	7	41	8.45691e+07	0.942177	0.989113	0.955911	127.151	18.62	13	41	392	41.3422	5.26221
21222583	hypothetical protein SCO4186 [Streptomyces coelicolor A3(2)]	10.29	1	4	4	11	1.59122e+07	0.941718	1.03174	0.935015	36.3142	10.29	7	11	418	46.3755	5.71924
21223584	RNA polymerase sigma factor RpoE [Streptomyces coelicolor A3(2)]	15.42	1	2	3	9	2.36626e+07	0.941627	0.875446	1.06325	36.1271	15.42	5	9	227	25.2024	5.38916
21222861	hypothetical protein SCO4474 [Streptomyces coelicolor A3(2)]	9.06	1	4	4	10	2.09546e+07	0.941513	0.89111	1.11709	36.9573	9.06	8	10	574	61.8747	5.37646
21220691	hypothetical protein SCO2219 [Streptomyces coelicolor A3(2)]	14.63	1	2	2	12	3.77923e+07	0.941176	1.04012	0.924747	44.2365	14.63	4	12	205	22.1311	4.91943
21223513	acyl CoA isomerase [Streptomyces coelicolor A3(2)]	40.07	1	9	9	36	1.505e+08	0.941115	1.0364	0.861741	120.867	40.07	17	36	267	27.8725	5.52881
21220989	metalloprotease [Streptomyces coelicolor A3(2)]	13.76	1	3	3	14	2.69906e+07	0.940307	1.98889	0.448874	41.6238	13.76	6	14	356	38.2219	4.90674
21219708	acyl-CoA dehydrogenase [Streptomyces coelicolor A3(2)]	7.73	1	2	2	6	1.75734e+07	0.940132	0.938037	1.01544	17.7638	7.73	4	6	362	37.2067	5.63037
21225025	acetyl-CoA acetyltransferase [Streptomyces coelicolor A3(2)]	21.29	2	5	5	17	4.80388e+07	0.93955	0.871871	1.03019	67.4416	21.29	9	17	404	42.2207	5.24951
32141190	phosphoribosylaminoimidazole carboxylase ATPase subunit [Streptomyces coelicolor A3(2)]	28.22	1	7	7	24	3.92963e+07	0.938896	0.905262	1.01936	69.631	28.22	13	24	411	44.4108	6.81494
32141192	bifunctional N-acetylglucosamine-1-phosphate uridyltransferase/glucosamine-1-phosphate acetyltransferase [Streptomyces coelicolor A3(2)]	33.4	1	12	12	70	1.55933e+08	0.938881	0.976763	0.953406	248.466	33.4	23	70	482	49.7654	6.12549
21223652	hydrolase [Streptomyces coelicolor A3(2)]	11.64	1	1	1	1	34056842	0.938775	1.13367	0.828049	0	11.64	1	1	275	29.3981	8.67529
21223757	large Ala/Glu-rich protein [Streptomyces coelicolor A3(2)]	4.75	1	6	7	16	2.69483e+07	0.93855	0.883463	1.07658	39.2995	4.75	12	16	1326	146.35	4.94482
21219097	hypothetical protein SCO0563 [Streptomyces coelicolor A3(2)]	3.56	1	2	2	6	1.37354e+07	0.938076	0.831991	1.12746	15.8806	3.56	4	6	477	51.5417	7.04932
21222559	molybdopterin converting factor [Streptomyces coelicolor A3(2)]	27.38	1	1	1	6	3.74496e+07	0.938051	1.03384	0.942805	27.2669	27.38	2	6	84	8.75453	5.85889
21219675	methyltransferase [Streptomyces coelicolor A3(2)]	5.03	1	1	1	4	2.20692e+07	0.937911	1.0214	0.91822	11.1174	5.03	2	4	199	20.964	6.94678
21221968	anti-sigma factor antagonist [Streptomyces coelicolor A3(2)]	53.1	1	6	6	89	8.37007e+08	0.937904	1.0818	0.855181	304.936	53.1	10	89	113	12.3135	5.23682
21223170	two-component system DNA-binding response regulator [Streptomyces coelicolor A3(2)]	20.72	1	4	4	14	2.11728e+07	0.937881	1.00456	0.924778	49.2216	20.72	8	14	251	26.852	5.5415
21220734	hypothetical protein SCO2265 [Streptomyces coelicolor A3(2)]	25	1	2	2	6	1.69619e+07	0.937814	0.918267	1.02124	15.8117	25	4	6	92	10.3968	5.2749
21220530	hypothetical protein SCO2049 [Streptomyces coelicolor A3(2)]	11.19	1	1	1	6	6.57624e+07	0.937811	0.972974	0.96382	21.7487	11.19	2	6	134	14.3733	5.12256
21219442	succinate dehydrogenase flavoprotein subunit [Streptomyces coelicolor A3(2)]	7.09	1	4	4	14	1.26218e+07	0.937663	0.878846	1.06688	48.8429	7.09	8	14	649	71.9747	5.85889
21222968	ABC transporter ATP-binding protein [Streptomyces coelicolor A3(2)]	7.34	1	2	2	4	8.84601e+06	0.937635	0.755816	1.24051	12.2384	7.34	4	4	327	34.214	6.18896
21219668	hypothetical protein SCO1155 [Streptomyces coelicolor A3(2)]	7.3	1	1	1	6	3.3425e+07	0.937528	0.839016	1.15758	8.40084	7.3	2	6	137	14.4082	5.21143
21220507	glutamate synthase [Streptomyces coelicolor A3(2)]	7.99	1	9	9	30	2.33951e+07	0.936838	1.03802	0.879367	85.425	7.99	16	30	1514	162.81	5.63037
21223459	actinorhodin polyketide beta-ketoacyl synthase subunit beta [Streptomyces coelicolor A3(2)]	57.74	1	15	15	84	572127809	0.936645	0.933417	0.979643	289.423	57.74	29	84	407	42.5237	5.59229
21221050	transferase [Streptomyces coelicolor A3(2)]	6.79	2	7	7	21	2.85625e+07	0.936542	0.914787	0.960286	49.4907	6.79	11	21	942	104.999	5.89697
21219005	non-heme chloroperoxidase [Streptomyces coelicolor A3(2)]	48.91	1	7	7	41	3.06999e+08	0.936152	0.845619	1.12907	157.498	48.91	14	41	276	29.8537	5.42725
21221300	2-hydroxyhepta-2,4-diene-1,7-dioate isomerase [Streptomyces coelicolor A3(2)]	6.67	1	1	1	2	0	0.936127	0.957022	0.978125	5.71977	6.67	2	2	285	30.6968	4.85596
21219877	hypothetical protein SCO1372 [Streptomyces coelicolor A3(2)]	4.73	1	1	1	2	6.69208e+06	0.936069	0.781726	1.19739	5.20344	4.73	2	2	275	29.2758	9.56885
21220394	hypothetical protein SCO1907 [Streptomyces coelicolor A3(2)]	21.47	2	7	7	17	3.11162e+07	0.935671	0.976979	0.93092	36.5201	21.47	13	17	475	49.9172	4.34814
21220667	lipoyl synthase [Streptomyces coelicolor A3(2)]	8.2	1	2	2	4	1.98762e+07	0.935661	0.912915	1.02487	7.80116	8.2	4	4	317	36.0623	6.56592
21220836	hypothetical protein SCO2368 [Streptomyces coelicolor A3(2)]	92.67	1	10	14	526	5.72968e+09	0.935389	0.927267	1.00069	2093.97	92.67	28	526	191	20.3752	4.70361
21221810	nicotinate-nucleotide pyrophosphorylase [Streptomyces coelicolor A3(2)]	12.77	1	4	4	11	3.41735e+07	0.935365	0.937535	0.998263	34.6369	12.77	7	11	329	34.1441	4.4751
21220423	glucose-6-phosphate 1-dehydrogenase [Streptomyces coelicolor A3(2)]	50.69	1	15	22	106	1.96982e+08	0.935031	1.00154	0.931259	345.295	50.69	43	106	507	56.5717	5.40186
21221766	hydrolase [Streptomyces coelicolor A3(2)]	3.11	1	1	1	1	7.31711e+06	0.934972	0.938999	0.995669	1.6268	3.11	1	1	193	20.4443	4.88135
21220047	hypothetical protein SCO1548 [Streptomyces coelicolor A3(2)]	30.23	1	2	2	12	1.42086e+08	0.93452	0.724912	1.2645	50.6084	30.23	4	12	86	9.36145	8.07471
21223259	lipoprotein [Streptomyces coelicolor A3(2)]	66.09	1	17	21	121	2.50403e+08	0.934173	0.900182	1.01585	496.526	66.09	41	121	348	36.0493	5.05908
21223262	sugar ABC transporter integral membrane protein [Streptomyces coelicolor A3(2)]	1.65	1	1	1	2	4.73897e+06	0.933577	0.894548	1.04359	4.66582	1.65	2	2	424	44.4368	9.53955
21222273	hypothetical protein SCO3865 [Streptomyces coelicolor A3(2)]	16.15	1	2	2	6	2.13261e+07	0.933566	1.02391	0.934317	23.1322	16.15	4	6	260	28.3403	5.61768
21221305	hypothetical protein SCO2855 [Streptomyces coelicolor A3(2)]	26.92	1	7	7	27	4.49247e+07	0.933465	0.930627	0.991567	82.6026	26.92	13	27	338	36.6804	4.91943
21222784	iron repressor [Streptomyces coelicolor A3(2)]	63.04	2	9	9	39	1.91581e+08	0.933178	0.891736	1.07053	121.452	63.04	17	39	230	25.1748	4.83057
21221839	hypothetical protein SCO3412 [Streptomyces coelicolor A3(2)]	18.87	1	2	2	12	1.40705e+07	0.933014	0.93035	1.01397	35.425	18.87	4	12	106	11.315	7.35693
31340546	prephenate dehydrogenase [Streptomyces coelicolor A3(2)]	3.6	1	1	1	2	0	0.932801	0.983966	0.947962	5.0862	3.6	2	2	361	37.8367	5.57959
21224049	kinase [Streptomyces coelicolor A3(2)]	2.01	1	1	1	1	0	0.932194	0.93227	0.999878	2.00949	2.01	1	1	299	32.6155	8.67529
21219026	hydrolase [Streptomyces coelicolor A3(2)]	0.62	1	1	1	1	344753904	0.932005	0.913175	1.02058	0	0.62	1	1	1138	124.176	6.30322
21224056	ribosome-binding factor A [Streptomyces coelicolor A3(2)]	56.88	1	8	8	34	1.43767e+08	0.931906	0.92136	1.02067	128.921	56.88	14	34	160	17.3798	4.84326
32141292	Ser/Thr protein kinase, partial [Streptomyces coelicolor A3(2)]	1.35	1	2	2	6	1.11666e+07	0.931864	0.842998	1.10537	16.3094	1.35	4	6	1261	133.876	4.97021
21219723	hypothetical protein SCO1213 [Streptomyces coelicolor A3(2)]	11.98	1	2	2	9	1.8547e+07	0.931619	1.01148	0.909214	33.5196	11.98	3	9	242	26.2024	5.33838
21223947	hypothetical protein SCO5592 [Streptomyces coelicolor A3(2)]	54.43	1	4	4	18	1.07584e+08	0.931521	0.977544	0.948497	59.2374	54.43	8	18	79	8.67777	9.92041
21219002	oxidoreductase [Streptomyces coelicolor A3(2)]	53.4	1	10	10	65	1.9221e+08	0.931411	1.00853	0.908093	209.808	53.4	19	65	309	32.5971	6.31592
21223927	50S ribosomal protein L32 [Streptomyces coelicolor A3(2)]	43.86	1	2	2	8	4.56904e+08	0.931274	1.08728	0.86783	28.0303	43.86	4	8	57	6.56839	10.2866
21222351	cytochrome oxidase subunit II [Streptomyces coelicolor A3(2)]	3.29	1	1	1	8	4.73367e+07	0.930986	0.915144	1.02541	18.4964	3.29	2	8	334	36.9777	6.69775
21220770	hypothetical protein SCO2301 [Streptomyces coelicolor A3(2)]	3.51	1	1	1	2	0	0.930657	0.909389	1.02334	4.38404	3.51	2	2	285	30.1844	5.35107
21219963	inosine 5-monophosphate dehydrogenase [Streptomyces coelicolor A3(2)]	14.49	1	6	6	22	2.52967e+07	0.930614	0.956014	0.98732	65.0582	14.49	12	22	483	51.1603	6.1001
21221457	translation initiation factor [Streptomyces coelicolor A3(2)]	10.79	1	3	3	8	1.96594e+07	0.930452	0.875331	1.08133	26.2328	10.79	6	8	380	39.1114	5.18604
21220028	elongation factor G [Streptomyces coelicolor A3(2)]	1.37	1	1	1	2	4.80283e+06	0.930399	0.874819	1.06349	3.40151	1.37	1	2	732	78.1068	5.36377
21221533	hypothetical protein SCO3094 [Streptomyces coelicolor A3(2)]	23.66	1	4	4	23	3.35353e+07	0.930194	0.980586	1.01764	64.6502	23.66	8	23	186	20.1289	4.95752
21222978	oxidoreductase [Streptomyces coelicolor A3(2)]	31.94	2	12	13	63	2.95874e+08	0.930145	1.01813	0.911203	192.671	31.94	25	63	645	69.1524	5.35107
21222291	hypothetical protein SCO3884 [Streptomyces coelicolor A3(2)]	43.53	1	8	8	30	1.05157e+08	0.930142	1.03092	0.917755	90.0256	43.53	16	30	170	18.3413	4.58936
21225634	hypothetical protein SCO7360 [Streptomyces coelicolor A3(2)]	3	1	1	1	2	4.66566e+06	0.929841	0.992069	0.937236	0	3	2	2	200	21.9571	5.41455
21221964	transferase [Streptomyces coelicolor A3(2)]	15.45	1	6	6	23	2.59966e+07	0.929451	0.898789	1.04905	69.0572	15.45	12	23	505	53.8341	4.88135
21220450	export associated protein [Streptomyces coelicolor A3(2)]	41.67	1	6	6	26	3.68006e+08	0.928982	0.939921	0.991593	105.653	41.67	12	26	192	20.5624	6.17627
21225026	fatty acid oxidative multifunctional enzyme [Streptomyces coelicolor A3(2)]	44.63	2	25	25	101	6.62899e+07	0.928974	0.866263	1.05151	352.03	44.63	46	101	726	77.6158	5.40186
21220790	hypothetical protein SCO2322 [Streptomyces coelicolor A3(2)]	25.91	1	5	5	22	48864010	0.928944	0.75226	1.23482	73.6648	25.91	10	22	220	22.8774	7.76709
21220010	hydrolase [Streptomyces coelicolor A3(2)]	5.53	1	1	1	6	9.29323e+06	0.928886	0.937773	0.990483	22.9143	5.53	2	6	235	24.4842	5.26221
21223783	pyruvate kinase [Streptomyces coelicolor A3(2)]	69.54	1	27	27	162	3.57913e+08	0.928855	0.947181	0.948336	600.038	69.54	53	162	476	51.1344	5.70654
21219876	oxidoreductase [Streptomyces coelicolor A3(2)]	31.6	1	5	5	20	3.45944e+07	0.928807	0.933182	0.912759	61.0741	31.6	10	20	269	28.4595	5.24951
21219739	tripeptidylaminopeptidase [Streptomyces coelicolor A3(2)]	32.9	1	14	14	63	1.89301e+08	0.92861	0.727734	1.25511	181.058	32.9	26	63	541	58.4992	8.104
21220966	ABC-transporter metal-binding lipoprotein [Streptomyces coelicolor A3(2)]	32.62	1	10	10	38	6.57976e+07	0.928568	0.726787	1.21663	128.899	32.62	19	38	328	35.1544	4.86865
21221508	anti anti sigma factor [Streptomyces coelicolor A3(2)]	12	1	2	2	8	2.14946e+07	0.928391	1.06366	0.888611	21.3466	12	4	8	125	13.0876	4.76709
21219972	hypothetical protein SCO1470 [Streptomyces coelicolor A3(2)]	5.69	1	1	1	6	4.46359e+08	0.928196	0.789707	1.17064	14.8989	5.69	2	6	123	13.1098	6.78564
21223295	acyl-CoA carboxylase complex A subunit [Streptomyces coelicolor A3(2)]	56.1	1	21	21	117	2.85757e+08	0.928089	0.847541	1.06695	419.472	56.1	42	117	590	62.4751	5.24951
21220853	hypothetical protein SCO2386 [Streptomyces coelicolor A3(2)]	2.49	1	1	1	2	9.4757e+06	0.928085	0.914927	1.01434	7.1566	2.49	2	2	401	42.7163	5.12256
21222461	hypothetical protein SCO4058 [Streptomyces coelicolor A3(2)]	9.58	1	1	1	4	1.41688e+07	0.928014	1.00207	0.926063	15.7449	9.58	2	4	167	18.5451	4.729
21222033	hypothetical protein SCO3617 [Streptomyces coelicolor A3(2)]	31.51	1	5	5	20	8.89467e+07	0.92797	1.05661	0.855631	64.1719	31.51	10	20	219	24.3201	4.42432
21221767	pyrroline-5-carboxylate reductase [Streptomyces coelicolor A3(2)]	28.52	1	6	6	28	9.26056e+07	0.927518	0.916094	1.00505	100.612	28.52	12	28	284	29.7874	6.07471
21220396	hypothetical protein SCO1909 [Streptomyces coelicolor A3(2)]	32.77	1	4	4	26	1.15924e+08	0.927472	1.12973	0.87282	85.0777	32.77	8	26	235	26.3691	6.26514
32141291	uricase, partial [Streptomyces coelicolor A3(2)]	2.57	1	1	1	4	4.19635e+06	0.927371	1.08173	0.857267	7.48769	2.57	2	4	311	35.3066	5.97314
21220172	hypothetical protein SCO1676 [Streptomyces coelicolor A3(2)]	63.82	1	22	23	136	2.67184e+08	0.927348	1.00737	0.911364	414.384	63.82	45	136	445	47.85	5.14795
21223433	GTP-dependent nucleic acid-binding protein EngD [Streptomyces coelicolor A3(2)]	47.24	1	13	13	60	7.71274e+07	0.927265	0.880656	1.05595	200.016	47.24	26	60	362	39.4487	4.85596
21220909	acetyl CoA carboxylase subunits alpha/beta [Streptomyces coelicolor A3(2)]	3.93	1	1	1	2	4.18472e+07	0.926876	0.980556	0.945216	5.39318	3.93	1	2	458	47.1513	6.354
21218941	glycosyl transferase [Streptomyces coelicolor A3(2)]	2.22	1	1	1	4	4.75511e+06	0.926857	0.880036	1.05316	5.67201	2.22	2	4	315	35.493	7.88428
21219094	catalase/peroxidase [Streptomyces coelicolor A3(2)]	37.03	1	20	20	106	1.29777e+08	0.926848	0.971927	0.945258	365.241	37.03	39	106	740	80.7661	4.88135
21220390	transport associated protein [Streptomyces coelicolor A3(2)]	9.52	1	2	3	7	5.22578e+07	0.926847	0.944734	0.983812	20.5562	9.52	5	7	399	41.3833	5.23682
21221802	Clp-family ATP-binding protease [Streptomyces coelicolor A3(2)]	33.89	3	21	23	102	1.65249e+08	0.926548	0.918784	1.02594	317.653	33.89	44	102	841	92.9572	6.01123
21218816	hydroxylase [Streptomyces coelicolor A3(2)]	10.27	1	3	3	8	1.94724e+07	0.926481	0.990756	0.935086	22.1971	10.27	6	8	263	27.5961	4.56396
21221730	oxidoreductase [Streptomyces coelicolor A3(2)]	38.46	1	8	8	34	6.53605e+07	0.925733	0.894173	1.03193	113.777	38.46	16	34	260	26.8931	6.13818
21225633	hydrolase [Streptomyces coelicolor A3(2)]	11.55	1	3	3	10	2.13323e+07	0.925703	1.08645	0.898565	24.5987	11.55	6	10	251	26.6263	5.73193
21222488	amidophosphoribosyltransferase [Streptomyces coelicolor A3(2)]	28.3	1	9	9	46	1.08263e+08	0.925485	0.809602	1.12497	164.833	28.3	18	46	530	56.6491	5.41455
21220277	iron-siderophore uptake system ATP-binding protein [Streptomyces coelicolor A3(2)]	6.31	1	2	2	4	7.83147e+06	0.925382	0.858229	1.0782	12.4015	6.31	4	4	301	32.7221	6.65381
21223636	hypothetical protein SCO5269 [Streptomyces coelicolor A3(2)]	1.21	1	1	1	1	2.10888e+08	0.925344	0.729495	1.26842	2.33553	1.21	1	1	745	80.0684	6.16357
21222083	chaperone protein DnaJ [Streptomyces coelicolor A3(2)]	2.01	1	1	1	2	5.48731e+06	0.924269	0.747874	1.23581	4.70638	2.01	2	2	399	41.3119	8.99756
21221469	hypothetical protein SCO3026 [Streptomyces coelicolor A3(2)]	15.73	1	4	4	12	2.67906e+07	0.924227	0.930728	0.952586	37.3072	15.73	8	12	375	38.2071	4.86865
21220515	prolipoprotein diacylglyceryl transferase [Streptomyces coelicolor A3(2)]	10.79	1	2	2	8	5.32264e+07	0.924214	0.758265	1.25992	36.092	10.79	4	8	343	36.7798	5.71924
21223514	hypothetical protein SCO5145 [Streptomyces coelicolor A3(2)]	50	1	4	4	37	9.02293e+08	0.923906	0.858465	1.08918	141.795	50	8	37	74	7.51191	5.40186
21220125	hypothetical protein SCO1629 [Streptomyces coelicolor A3(2)]	7.41	1	1	1	2	2.94124e+07	0.923783	1.85463	0.498076	4.64949	7.41	2	2	135	14.4141	4.88135
21219660	lipoprotein [Streptomyces coelicolor A3(2)]	5.95	1	1	1	2	0	0.923655	0.875639	1.05479	0	5.95	2	2	252	26.432	7.28369
32141262	phosphate acetyltransferase [Streptomyces coelicolor A3(2)]	17.79	1	10	12	43	5.06454e+07	0.923628	1.05736	0.860282	138.45	17.79	23	43	697	74.0014	4.99561
21222190	nucleoside hydrolase [Streptomyces coelicolor A3(2)]	13.19	1	2	2	8	2.96224e+07	0.923228	0.991251	0.92943	27.5145	13.19	4	8	326	34.2141	5.41455
21221527	lipoprotein [Streptomyces coelicolor A3(2)]	5.02	1	1	1	6	6.86553e+06	0.923142	0.700999	1.31684	21.4724	5.02	2	6	259	26.0063	4.60205
21223748	hypothetical protein SCO5388 [Streptomyces coelicolor A3(2)]	7.97	1	2	2	8	1.23655e+07	0.922954	0.996111	0.913537	20.9646	7.97	4	8	251	27.4604	5.88428
21223980	elongation factor Ts [Streptomyces coelicolor A3(2)]	66.55	2	18	18	153	5.50588e+08	0.922705	0.970455	0.963446	508.74	66.55	36	153	278	29.8296	5.63037
21219886	hypothetical protein SCO1382 [Streptomyces coelicolor A3(2)]	14.65	1	2	2	10	32980718	0.922647	0.966215	0.9537	27.3258	14.65	4	10	157	17.0796	4.25928
21222841	hypothetical protein SCO4453 [Streptomyces coelicolor A3(2)]	32.59	1	3	3	16	7.18178e+07	0.922567	1.01899	0.897005	58.6073	32.59	6	16	135	14.9373	4.67822
21220426	hypothetical protein SCO1940 [Streptomyces coelicolor A3(2)]	4.71	1	1	1	1	7.0213e+07	0.922504	0.817521	1.12837	0	4.71	1	1	255	27.2177	5.05908
21219810	hypothetical protein SCO1303 [Streptomyces coelicolor A3(2)]	4.12	1	1	1	2	5.81279e+06	0.921953	0.923781	0.997979	6.30337	4.12	2	2	267	28.2508	5.70654
21223802	alpha-amylase [Streptomyces coelicolor A3(2)]	2.81	2	2	2	6	1.0932e+07	0.921566	1.01218	0.883688	16.8554	2.81	4	6	675	75.2431	6.58057
21223451	hydrolase [Streptomyces coelicolor A3(2)]	54.07	1	15	15	92	5.26772e+08	0.921268	0.90948	0.994761	319.857	54.07	30	92	381	39.808	5.80811
21221468	mannose-6-phosphate isomerase [Streptomyces coelicolor A3(2)]	25.59	1	8	8	32	4.67251e+07	0.920597	1.00188	0.93196	112.132	25.59	16	32	383	40.9008	5.18604
21221965	hypothetical protein SCO3546 [Streptomyces coelicolor A3(2)]	61.73	1	14	14	77	1.74692e+08	0.919821	0.773146	1.17358	243.418	61.73	27	77	196	20.3541	4.94482
21221520	acetyl-CoA acetyltransferase [Streptomyces coelicolor A3(2)]	56.65	1	14	14	83	1.44764e+08	0.919448	1.10407	0.813679	266.543	56.65	28	83	406	42.5966	5.021
21223714	diaminopimelate decarboxylase [Streptomyces coelicolor A3(2)]	25.92	1	9	9	35	4.51807e+07	0.919213	0.943768	1.00134	112.782	25.92	18	35	463	49.7315	5.35107
21220555	DNA-binding protein [Streptomyces coelicolor A3(2)]	13.39	1	3	3	14	1.97734e+07	0.91859	0.994479	0.920474	50.7148	13.39	6	14	239	25.2099	9.27588
21221272	decarboxylase [Streptomyces coelicolor A3(2)]	43.21	1	7	7	38	2.20817e+08	0.918569	1.03101	0.890191	129.818	43.21	14	38	243	25.5962	4.97021
21219871	hypothetical protein SCO1366 [Streptomyces coelicolor A3(2)]	31.34	1	4	4	26	1.11519e+08	0.918165	1.29493	0.714551	117.993	31.34	8	26	217	22.7964	7.15186
21222893	cell division-like protein [Streptomyces coelicolor A3(2)]	2.82	1	3	3	4	1.55467e+07	0.917677	0.800817	1.14588	11.3208	2.82	4	4	1525	163.225	5.32568
21219685	aldehyde dehydrogenase [Streptomyces coelicolor A3(2)]	59.57	1	23	23	141	4.37137e+08	0.917103	1.40287	0.66125	446.643	59.57	45	141	507	55.6389	5.46533
21220127	helicase [Streptomyces coelicolor A3(2)]	3.05	1	3	3	12	1.2174e+07	0.916944	0.734811	1.27827	39.7684	3.05	6	12	950	105.763	7.75244
21219494	hypothetical protein SCO0977 [Streptomyces coelicolor A3(2)]	61.21	1	5	5	18	3.95904e+07	0.916883	1.12267	0.812519	58.8117	61.21	10	18	116	12.5216	5.26221
21223129	hypothetical protein SCO4750 [Streptomyces coelicolor A3(2)]	16.13	1	1	1	2	3.0229e+07	0.916816	0.914048	1.00299	5.52892	16.13	2	2	217	22.607	6.11279
21219770	GntR family transcriptional regulator [Streptomyces coelicolor A3(2)]	3.95	1	1	1	2	5.24974e+06	0.916427	0.802201	1.14234	4.09594	3.95	2	2	253	27.1269	5.21143
21221757	epimerase [Streptomyces coelicolor A3(2)]	5.38	1	2	2	6	1.37225e+07	0.916361	0.769102	1.19142	11.6286	5.38	4	6	353	37.4918	9.56885
21221451	two-component system response regulator [Streptomyces coelicolor A3(2)]	2.78	1	1	1	2	0	0.916168	0.873795	1.04845	4.89388	2.78	2	2	252	27.3872	4.98291
21225265	solute-binding lipoprotein [Streptomyces coelicolor A3(2)]	4.12	1	1	1	4	5.98999e+06	0.91594	0.860319	1.06461	12.9181	4.12	2	4	340	35.465	6.27783
21219272	hydrolase [Streptomyces coelicolor A3(2)]	24.35	1	3	3	13	7.29539e+07	0.915697	0.876412	1.07263	48.0943	24.35	6	13	193	20.1655	5.97314
21219737	acyltransferase [Streptomyces coelicolor A3(2)]	7.08	1	2	2	5	7.48763e+06	0.915303	0.751998	1.1948	12.7288	7.08	3	5	240	26.3021	9.90576
21221500	dipeptidase [Streptomyces coelicolor A3(2)]	47.75	1	11	11	74	1.05427e+08	0.915142	0.953863	0.970512	268.325	47.75	21	74	400	43.2264	5.17334
21223395	lipoprotein [Streptomyces coelicolor A3(2)]	13.64	1	3	3	18	4.11489e+07	0.914749	0.898452	1.03023	61.9126	13.64	6	18	220	23.4345	5.10986
21224075	hypothetical protein SCO5728 [Streptomyces coelicolor A3(2)]	6.13	1	1	1	4	1.20717e+07	0.9147	0.90987	1.00527	13.5518	6.13	2	4	212	22.6993	5.42725
21224390	UDP-N-acetylmuramoyl-L-alanine ligase [Streptomyces coelicolor A3(2)]	8.44	1	4	4	16	1.22605e+07	0.914616	0.808573	1.13856	40.8008	8.44	8	16	462	47.6045	5.08447
21220292	two component response regulator [Streptomyces coelicolor A3(2)]	5.24	1	1	1	2	1.22431e+07	0.914085	0.918367	0.995296	7.06817	5.24	2	2	210	22.665	5.84619
21220490	branched-chain amino acid ABC transporter substrate-binding protein [Streptomyces coelicolor A3(2)]	64.11	1	25	25	178	6.88355e+08	0.913327	0.913311	1.00475	610.558	64.11	49	178	418	43.477	5.46533
21223884	alpha-isopropylmalate/homocitrate synthase family transferase [Streptomyces coelicolor A3(2)]	13.3	1	6	6	14	2.96145e+07	0.912757	0.965383	0.907277	50.1924	13.3	12	14	534	57.4913	5.43994
21220269	hypothetical protein SCO1777 [Streptomyces coelicolor A3(2)]	9.64	1	3	3	6	2.4556e+07	0.912389	0.953632	1.02451	23.8219	9.64	6	6	612	68.3974	5.23682
21221030	leucyl-tRNA synthetase [Streptomyces coelicolor A3(2)]	18.43	1	17	17	68	8.19091e+07	0.912379	0.920381	0.984169	205.258	18.43	32	68	966	107.062	5.26221
21223431	polyphosphate glucokinase [Streptomyces coelicolor A3(2)]	25.61	1	4	4	13	3.12186e+07	0.911893	0.906695	0.956416	37.2465	25.61	7	13	246	25.9253	6.45557
21225049	glycosyltransferase [Streptomyces coelicolor A3(2)]	3.79	1	1	1	2	6.97095e+06	0.911885	0.850892	1.07164	5.99971	3.79	2	2	290	32.0917	9.33447
21220148	hypothetical protein SCO1652 [Streptomyces coelicolor A3(2)]	4.01	1	1	1	2	1.7931e+07	0.911573	0.86504	1.05375	8.13008	4.01	2	2	374	39.7705	5.97314
21220273	inorganic polyphosphate/ATP-NAD kinase [Streptomyces coelicolor A3(2)]	11.3	1	3	3	13	3.07293e+07	0.91092	1.01143	0.828223	32.5364	11.3	6	13	301	32.0611	6.17627
21222314	single-stranded DNA-binding protein [Streptomyces coelicolor A3(2)]	28.14	1	6	6	40	654010914	0.910907	0.952198	0.929051	143.533	28.14	12	40	199	19.8946	5.37646
21219405	thioredoxin [Streptomyces coelicolor A3(2)]	58.96	1	5	5	40	1.92565e+08	0.910752	1.01946	0.894637	108.808	58.96	10	40	134	14.5801	4.25928
21225270	oxidoreductase [Streptomyces coelicolor A3(2)]	2.79	1	1	1	2	1.01829e+07	0.910366	1.0114	0.900071	5.33837	2.79	2	2	358	37.2627	5.14795
21221133	ABC transporter ATP-binding protein [Streptomyces coelicolor A3(2)]	46.25	1	20	20	100	4.8019e+08	0.910211	0.992199	0.94867	358.157	46.25	40	100	547	60.6451	5.35107
21218811	hypothetical protein SCO0260 [Streptomyces coelicolor A3(2)]	55.05	1	5	5	40	2.62332e+08	0.910155	1.1072	0.825364	149.408	55.05	10	40	109	12.154	4.77979
21221479	2-phospho-L-lactate transferase [Streptomyces coelicolor A3(2)]	15.67	1	3	3	18	5.17279e+07	0.909978	0.931329	1.02158	67.2511	15.67	6	18	319	33.5923	4.79248
21223042	elongation factor G [Streptomyces coelicolor A3(2)]	72.6	1	33	33	237	5.37169e+08	0.909071	0.983855	0.927216	737.111	72.6	64	237	708	77.6083	5.07178
21221456	two-component system response regulator [Streptomyces coelicolor A3(2)]	42.36	1	6	6	22	5.8679e+07	0.908707	0.977742	0.878102	86.9088	42.36	12	22	229	25.2325	6.03662
21225470	hypothetical protein SCO7191 [Streptomyces coelicolor A3(2)]	14.13	1	2	2	4	1.68028e+07	0.90855	1.02944	0.882533	8.87714	14.13	4	4	269	28.3786	5.85889
21223627	hypothetical protein SCO5260 [Streptomyces coelicolor A3(2)]	53.13	1	15	15	100	1.59054e+08	0.908138	0.808602	1.11949	342.329	53.13	29	100	320	33.3678	5.31299
21220533	imidazoleglycerol-phosphate dehydratase [Streptomyces coelicolor A3(2)]	12.69	1	2	2	6	4.0274e+07	0.908114	0.927279	0.979292	24.6717	12.69	3	6	197	21.576	6.30322
21220129	twin arginine translocase A [Streptomyces coelicolor A3(2)]	45.26	1	3	3	10	9.31827e+07	0.907941	0.765122	1.1929	37.7487	45.26	6	10	95	10.0324	9.5249
21220185	acyl-CoA dehydrogenase [Streptomyces coelicolor A3(2)]	20.54	1	6	6	18	2.54507e+07	0.907625	1.01916	0.897951	59.0227	20.54	12	18	404	44.7376	6.11279
21223936	docking protein [Streptomyces coelicolor A3(2)]	46.12	1	13	13	67	1.03384e+08	0.907218	0.857125	1.12536	206.026	46.12	24	67	412	43.6233	4.89404
21223753	ABC transporter ATP-binding protein [Streptomyces coelicolor A3(2)]	2.13	1	1	1	6	7.00871e+06	0.90703	0.795067	1.14078	11.2229	2.13	2	6	423	43.9746	8.38232
21223940	PII uridylyl-transferase [Streptomyces coelicolor A3(2)]	3.95	1	2	3	7	1.02528e+08	0.906625	0.666889	1.37383	17.1317	3.95	4	7	835	88.9933	6.68311
21220186	TetR family transcriptional regulator [Streptomyces coelicolor A3(2)]	4.78	1	1	1	2	4.77986e+06	0.906333	0.928037	0.976571	6.64799	4.78	2	2	251	28.0014	7.21045
21220564	UDPdiphospho-muramoylpentapeptide beta-N- acetylglucosaminyltransferase [Streptomyces coelicolor A3(2)]	24.18	1	6	6	24	3.02504e+07	0.906167	0.947851	0.985545	88.2994	24.18	11	24	364	38.8178	9.29053
21224395	substrate-binding protein [Streptomyces coelicolor A3(2)]	28.13	1	7	7	26	7.40728e+07	0.906163	0.871972	1.01129	113.561	28.13	14	26	320	33.6605	5.78271
21222949	NADH dehydrogenase subunit E [Streptomyces coelicolor A3(2)]	18.28	1	4	4	14	2.18095e+07	0.906	0.938908	0.849802	41.4223	18.28	8	14	290	30.6158	4.85596
21220098	hypothetical protein SCO1601 [Streptomyces coelicolor A3(2)]	13.22	1	1	1	4	5.23542e+07	0.905723	0.861815	1.0509	17.408	13.22	2	4	121	12.6364	4.57666
21220526	hypothetical protein SCO2045 [Streptomyces coelicolor A3(2)]	26.07	1	4	4	14	2.90404e+07	0.904598	0.830635	1.08631	53.213	26.07	8	14	211	23.5985	8.17725
21222221	D-alanyl-D-alanine carboxypeptidase [Streptomyces coelicolor A3(2)]	1.91	1	1	1	2	5970471	0.90416	1.12315	0.804986	3.5836	1.91	1	2	314	32.7425	10.7261
21219149	hypothetical protein SCO0616 [Streptomyces coelicolor A3(2)]	1.39	1	1	1	4	6.97899e+06	0.903879	1.20789	0.748279	14.0651	1.39	2	4	791	88.5717	6.20166
21222310	hypothetical protein SCO3903 [Streptomyces coelicolor A3(2)]	21.28	1	6	6	16	2.77497e+07	0.90359	1.0354	0.924743	51.8127	21.28	12	16	343	38.0178	8.63135
21223505	ferredoxin [Streptomyces coelicolor A3(2)]	87.74	1	6	6	60	7.73902e+08	0.903277	0.887966	1.01614	203.713	87.74	12	60	106	11.8714	4.25928
21223833	oligopeptide transport integral membrane protein [Streptomyces coelicolor A3(2)]	2.09	1	1	1	3	1.02429e+07	0.903133	0.953802	0.946837	6.77953	2.09	2	3	335	35.721	5.97314
21224021	oxidoreductase [Streptomyces coelicolor A3(2)]	2.32	1	1	1	1	1.92904e+06	0.902617	1.12707	0.800818	1.6286	2.32	1	1	475	52.3253	6.96143
21224601	3-oxoacyl-ACP reductase [Streptomyces coelicolor A3(2)]	27.55	1	4	4	18	8.0961e+07	0.90244	1.25608	0.749317	82.2896	27.55	8	18	265	27.4141	5.65576
21218939	hypothetical protein SCO0396 [Streptomyces coelicolor A3(2)]	2.59	1	1	1	2	4.18198e+06	0.902121	1.27452	0.707781	0	2.59	2	2	424	46.9673	5.46533
21220656	GntR family transcriptional regulator [Streptomyces coelicolor A3(2)]	7.25	1	2	2	5	1.91717e+07	0.90189	0.708215	1.31541	11.9133	7.25	3	5	207	23.0242	6.16357
21218846	hypothetical protein SCO0297 [Streptomyces coelicolor A3(2)]	8.94	1	4	4	14	3.80069e+07	0.901822	0.745556	1.20183	41.6157	8.94	8	14	425	44.5018	5.47803
21221908	sugar-binding protein [Streptomyces coelicolor A3(2)]	9.17	1	3	3	10	2.6582e+07	0.901785	1.46064	0.624578	37.6653	9.17	6	10	436	46.2292	4.94482
21223376	chitinase A [Streptomyces coelicolor A3(2)]	6.3	1	1	1	1	1.78056e+07	0.900877	1.50118	0.600088	0	6.3	1	1	571	58.0663	6.41748
21219593	LacI family transcriptional regulator [Streptomyces coelicolor A3(2)]	1.72	1	1	1	1	4.14468e+07	0.900418	1.11045	0.810825	0	1.72	1	1	349	37.4966	6.1001
21223837	oligopeptide ABC transporter ATP-binding protein [Streptomyces coelicolor A3(2)]	2.02	1	1	1	2	1.27134e+07	0.90014	1.0427	0.863239	3.56101	2.02	2	2	496	52.0311	4.88135
21223119	glucosamine--fructose-6-phosphate aminotransferase [Streptomyces coelicolor A3(2)]	1.14	1	1	1	3	2.05777e+08	0.900089	0.989377	0.913791	3.99627	1.14	1	3	615	65.52	5.68115
21225472	hypothetical protein SCO7193 [Streptomyces coelicolor A3(2)]	34.18	1	6	6	24	5.4494e+07	0.89969	0.863723	1.04505	93.4296	34.18	12	24	316	34.126	4.7417
21223452	hypothetical protein SCO5081 [Streptomyces coelicolor A3(2)]	76.99	1	5	5	29	6.01342e+08	0.899542	1.14318	0.79289	114.566	76.99	10	29	113	12.0921	5.08447
21224143	hypothetical protein SCO5798 [Streptomyces coelicolor A3(2)]	1.47	1	1	1	1	50899960	0.899462	0.927762	0.969457	0	1.47	1	1	409	42.9286	4.75439
21221999	hypothetical protein SCO3582 [Streptomyces coelicolor A3(2)]	5.83	1	2	2	4	2.47863e+07	0.8992	0.747745	1.2025	12.354	5.83	4	4	309	33.4211	7.91357
21222631	tRNA/rRNA methyltransferase [Streptomyces coelicolor A3(2)]	2.23	1	1	1	2	1.33226e+07	0.899139	0.813878	1.10471	4.89122	2.23	2	2	314	32.9472	9.96436
21219627	hypothetical protein SCO1113 [Streptomyces coelicolor A3(2)]	4.95	1	2	2	12	1.90824e+07	0.89904	1.30277	0.6418	36.8181	4.95	4	12	384	41.3613	5.19873
21224345	ABC transporter ATP-binding protein [Streptomyces coelicolor A3(2)]	40.38	1	9	9	66	1.13369e+08	0.89875	0.717399	1.23002	186.062	40.38	18	66	260	27.911	6.7124
21224148	LexA repressor [Streptomyces coelicolor A3(2)]	3.85	1	1	1	1	6784660	0.898615	0.799967	1.12327	1.6923	3.85	1	1	234	25.2952	7.56201
21220253	cytidylate kinase [Streptomyces coelicolor A3(2)]	23.38	1	4	4	11	2.57692e+07	0.898208	0.851061	1.04879	34.4413	23.38	7	11	231	23.5864	5.32568
21222429	ATP binding protein [Streptomyces coelicolor A3(2)]	12.82	1	1	1	2	1.34663e+07	0.898143	0.845227	1.06256	9.63662	12.82	2	2	156	17.2949	6.03662
21220363	penicillin binding protein [Streptomyces coelicolor A3(2)]	2.48	1	1	1	1	90969.1	0.896893	0.344518	2.60322	0	2.48	1	1	484	51.1315	5.07178
21219255	hypothetical protein SCO0730 [Streptomyces coelicolor A3(2)]	14.38	1	1	1	4	31066945	0.895826	0.844756	1.06041	17.4002	14.38	2	4	153	16.5929	11.1216
21219260	oxidoreductase [Streptomyces coelicolor A3(2)]	3.5	1	1	1	1	0	0.895674	0.959588	0.933356	2.78246	3.5	1	1	400	43.3416	6.39209
21220627	cytochrome C heme-binding subunit [Streptomyces coelicolor A3(2)]	22.3	1	4	4	21	6.89692e+07	0.895506	0.803711	1.04661	49.6167	22.3	8	21	269	27.509	7.38623
21222257	Ser/Thr protein kinase [Streptomyces coelicolor A3(2)]	18.57	2	11	12	53	5.02299e+07	0.895499	0.829028	1.04184	157.777	18.57	24	53	673	71.4438	4.93213
21224932	bacteriophage resistance gene pglY [Streptomyces coelicolor A3(2)]	5.26	1	5	5	22	2.01888e+07	0.895273	0.884956	0.988331	75.5426	5.26	10	22	1294	141.102	5.74463
21219304	anti sigma factor antagonist [Streptomyces coelicolor A3(2)]	6.63	1	1	1	1	7.25375e+06	0.894997	0.735319	1.21711	0	6.63	1	1	166	18.5558	10.7261
21223260	sugar ABC transporter ATP-binding protein [Streptomyces coelicolor A3(2)]	1.3	1	1	1	2	2.32815e+06	0.89488	0.897949	0.996541	4.95768	1.3	2	2	537	57.4553	5.51611
21223458	actinorhodin polyketide beta-ketoacyl synthase subunit alpha [Streptomyces coelicolor A3(2)]	43.9	1	18	18	92	5.79852e+08	0.894493	0.938677	0.956075	274.254	43.9	36	92	467	49.4733	5.05908
21223457	ketoacyl reductase [Streptomyces coelicolor A3(2)]	38.7	1	8	8	60	8.98485e+08	0.894369	1.12967	0.783102	201.107	38.7	16	60	261	27.2481	5.33838
21221351	ribonuclease PH [Streptomyces coelicolor A3(2)]	42.86	1	8	8	38	9.25286e+07	0.893962	1.27111	0.725414	123.806	42.86	15	38	245	26.3806	6.12549
21222218	hypothetical protein SCO3808 [Streptomyces coelicolor A3(2)]	11.31	1	3	3	11	2.08527e+07	0.893925	1.01155	0.940072	28.8173	11.31	6	11	274	30.7236	5.98584
21223948	16S rRNA-processing protein RimM [Streptomyces coelicolor A3(2)]	23.4	1	4	4	14	3.2082e+07	0.893398	0.971105	0.947309	40.477	23.4	7	14	188	20.2392	4.42432
21222993	hypothetical protein SCO4610 [Streptomyces coelicolor A3(2)]	9.42	1	1	1	4	8.57219e+07	0.892727	0.712023	1.25374	16.1634	9.42	2	4	138	14.8683	9.5249
21222254	protein phosphatase [Streptomyces coelicolor A3(2)]	16.12	1	7	7	21	3.26599e+07	0.892502	0.921233	0.974954	55.7427	16.12	13	21	515	54.284	4.89404
21223359	D-aminoacylase [Streptomyces coelicolor A3(2)]	8.4	1	4	4	18	1.96458e+07	0.892432	1.00539	0.895453	59.5324	8.4	7	18	536	58.1014	5.43994
21224474	hypothetical protein SCO6148 [Streptomyces coelicolor A3(2)]	65.84	1	21	22	92	4.68725e+08	0.892299	0.909356	0.975679	327.055	65.84	40	92	442	49.5547	5.32568
21221021	GTP-binding protein LepA [Streptomyces coelicolor A3(2)]	11.09	1	5	5	21	3.00841e+07	0.892285	0.810562	1.09803	75.4077	11.09	10	21	622	68.3356	5.66846
21225908	calcium binding protein [Streptomyces coelicolor A3(2)]	11.17	1	2	2	10	1.19906e+07	0.89208	1.47714	0.596772	22.7256	11.17	4	10	179	19.4524	4.38623
21223720	peptide chain release factor 1 [Streptomyces coelicolor A3(2)]	15.92	1	4	5	24	4.23202e+07	0.892065	0.997374	0.941727	63.2396	15.92	10	24	358	39.436	5.12256
21219926	glycosyl transferase [Streptomyces coelicolor A3(2)]	10.93	1	3	3	9	1.00039e+07	0.891674	0.672746	1.31902	29.0179	10.93	6	9	302	32.4886	5.93506
21220200	alcohol dehydrogenase [Streptomyces coelicolor A3(2)]	4.38	1	1	1	4	2.10348e+07	0.891574	1.01598	0.877518	17.3251	4.38	2	4	365	37.0983	6.17627
21219600	acyltransferase [Streptomyces coelicolor A3(2)]	2.48	1	1	1	2	5.39527e+06	0.891488	0.769135	1.15903	2.11853	2.48	2	2	242	26.9822	10.0815
21220251	GTP-binding protein EngA [Streptomyces coelicolor A3(2)]	8.54	1	4	4	16	1.98292e+07	0.891368	0.865108	1.05707	43.8389	8.54	8	16	492	53.1997	5.69385
21223411	hypothetical protein SCO5038 [Streptomyces coelicolor A3(2)]	30.45	1	9	9	40	8.53949e+07	0.890754	0.706774	1.21021	137.468	30.45	18	40	312	33.3283	5.18604
21222421	hypothetical protein SCO4018 [Streptomyces coelicolor A3(2)]	13.56	1	2	2	8	3.19223e+07	0.890401	1.04619	0.842982	27.0597	13.56	4	8	177	17.9159	4.90674
21224340	lipoprotein [Streptomyces coelicolor A3(2)]	33.48	1	15	15	65	96770483	0.890287	0.951776	0.93867	194.856	33.48	29	65	469	50.5797	5.41455
21223178	isobutyryl-CoA mutase, small subunit [Streptomyces coelicolor A3(2)]	9.42	2	1	1	8	35916142	0.890107	1.21908	0.73469	27.1226	9.42	2	8	138	14.3056	4.97021
21221982	acetyl-CoA synthetase [Streptomyces coelicolor A3(2)]	22.58	1	11	11	37	5.93146e+07	0.889817	1.10508	0.801464	121.627	22.58	21	37	651	71.0007	5.18604
21223232	succinate dehydrogenase flavoprotein subunit [Streptomyces coelicolor A3(2)]	55.65	1	26	26	139	2.28726e+08	0.889791	0.89377	0.996852	452.3	55.65	50	139	584	64.7476	5.70654
21221504	two-component system reponse regulator [Streptomyces coelicolor A3(2)]	22.22	1	5	5	22	2.5039e+07	0.889324	0.833142	1.03625	42.3422	22.22	10	22	225	25.0261	5.42725
21220641	hypothetical protein SCO2167 [Streptomyces coelicolor A3(2)]	39.36	1	4	4	30	2.10535e+08	0.889304	1.1286	0.752694	83.7351	39.36	8	30	94	9.98809	4.03076
21220605	hypothetical protein SCO2127 [Streptomyces coelicolor A3(2)]	20.42	1	4	4	17	2.4085e+07	0.888215	0.826169	1.09216	23.1756	20.42	8	17	191	20.1189	4.53857
21225408	hypothetical protein SCO7126 [Streptomyces coelicolor A3(2)]	18	1	1	1	1	34551329	0.888209	0.949327	0.935581	0	18	1	1	150	16.1017	5.18604
21221984	integral membrane transport protein [Streptomyces coelicolor A3(2)]	21.6	1	2	2	10	6.20965e+07	0.886982	0.827491	1.07185	34.2114	21.6	4	10	162	16.765	9.92041
21219722	ligase [Streptomyces coelicolor A3(2)]	8.01	1	3	3	8	1.45875e+07	0.88662	0.96513	0.88525	22.6291	8.01	6	8	412	43.4373	6.68311
21221072	folylpolyglutamate synthase [Streptomyces coelicolor A3(2)]	26.8	1	9	9	33	2.03286e+08	0.886579	0.945801	0.947248	119.726	26.8	16	33	444	46.8781	4.76709
21225879	hypothetical protein SCO7617 [Streptomyces coelicolor A3(2)]	8.86	1	2	2	4	2.09564e+07	0.886438	1.03119	0.859591	13.2934	8.86	4	4	271	29.5548	5.46533
21224359	acetyl-CoA acetyltransferase [Streptomyces coelicolor A3(2)]	33.58	1	8	8	26	6.54164e+07	0.885914	1.2028	0.721983	88.4348	33.58	16	26	405	43.1368	5.69385
32141239	hypothetical protein SCO4494 [Streptomyces coelicolor A3(2)]	1.55	1	1	1	4	1.59595e+07	0.885213	0.889539	0.995095	9.38439	1.55	2	4	387	44.3924	6.45557
21224346	ABC transporter [Streptomyces coelicolor A3(2)]	8.84	1	2	2	8	1.48669e+08	0.884963	0.773149	1.15981	37.0514	8.84	4	8	430	44.6691	9.27588
21223892	ATP/GTP binding protein [Streptomyces coelicolor A3(2)]	9.77	2	1	1	4	43334015	0.884864	1.02946	0.859507	17.6677	9.77	2	4	174	18.9086	4.85596
21220153	methionine synthase [Streptomyces coelicolor A3(2)]	7.35	1	7	7	22	1.96643e+07	0.884835	0.943873	0.914342	51.9656	7.35	12	22	1170	128.211	5.08447
32141267	nitrogen regulatory protein P-II, partial [Streptomyces coelicolor A3(2)]	19.64	1	2	2	8	1.0465e+08	0.884291	0.832978	1.06131	24.8826	19.64	4	8	112	12.2246	6.31592
21223616	nucleotide-binding protein [Streptomyces coelicolor A3(2)]	43.8	2	17	17	76	8.70079e+07	0.884118	1.40545	0.625367	256.811	43.8	33	76	468	52.1608	5.32568
21224431	nitrite/sulfite reductase [Streptomyces coelicolor A3(2)]	1.06	1	1	1	8	8.64038e+06	0.884052	0.820139	1.05689	19.804	1.06	2	8	565	62.8854	6.50732
21221392	hypothetical protein SCO2947 [Streptomyces coelicolor A3(2)]	55.67	1	3	3	16	5.72372e+07	0.883804	0.978834	0.906492	62.3582	55.67	6	16	97	10.345	6.29053
21224053	transcription elongation factor NusA [Streptomyces coelicolor A3(2)]	48.53	1	13	13	52	6.02432e+07	0.88366	0.907602	0.960536	183.188	48.53	26	52	340	36.8661	5.5415
21224052	hypothetical protein SCO5703 [Streptomyces coelicolor A3(2)]	32.2	1	3	3	12	2.13267e+07	0.88345	1.18092	0.696148	50.0492	32.2	6	12	177	19.7571	4.90674
21224094	sensory histidine kinase [Streptomyces coelicolor A3(2)]	7	2	7	8	37	4.27303e+07	0.882044	0.828954	1.03121	93.9028	7	16	37	1829	195.632	5.07178
21223868	acetolactate synthase 1 catalytic subunit [Streptomyces coelicolor A3(2)]	6.85	1	4	4	14	2.58766e+07	0.881926	0.847063	0.994512	33.1112	6.85	8	14	613	65.182	5.61768
21224393	ABC transporter permease [Streptomyces coelicolor A3(2)]	5.06	1	1	1	2	3.10475e+06	0.881318	0.812433	1.08474	6.23274	5.06	2	2	237	25.2549	8.90967
21219261	hypothetical protein SCO0736 [Streptomyces coelicolor A3(2)]	5.63	1	2	2	6	25281680	0.881243	0.756888	1.17355	10.7205	5.63	4	6	231	25.011	10.0815
21220132	hypothetical protein SCO1636 [Streptomyces coelicolor A3(2)]	3.89	1	1	1	2	3.85706e+06	0.881223	0.746688	1.18013	8.40114	3.89	2	2	360	39.01	5.10986
21225782	heat shock protein 90 [Streptomyces coelicolor A3(2)]	30.41	1	14	14	61	5.24932e+07	0.880929	0.98486	0.922072	188.695	30.41	28	61	638	71.584	4.97021
21224219	potassium uptake protein [Streptomyces coelicolor A3(2)]	26.46	1	3	3	8	3.25315e+07	0.880855	0.973673	1.0013	29.5505	26.46	6	8	223	24.1393	6.43018
32141151	excinuclease ABC subunit B [Streptomyces coelicolor A3(2)]	16.99	1	5	5	10	1.70389e+07	0.880101	0.788428	1.08861	36.7712	16.99	8	10	712	79.9782	5.21143
21219724	6-phosphofructokinase [Streptomyces coelicolor A3(2)]	11.14	1	2	2	8	2.48044e+07	0.879894	1.06885	0.839298	32.8826	11.14	4	8	341	36.409	6.03662
21222091	deoxycytidine triphosphate deaminase [Streptomyces coelicolor A3(2)]	8.9	1	1	1	4	2.47971e+07	0.879857	1.26326	0.696466	16.0036	8.9	2	4	191	21.4829	5.98584
21220161	hypothetical protein SCO1665 [Streptomyces coelicolor A3(2)]	18.88	1	4	4	16	3.64737e+07	0.879557	0.967654	0.903961	51.6104	18.88	8	16	196	21.2447	4.7417
21221076	ATP-dependent Clp protease proteolytic subunit [Streptomyces coelicolor A3(2)]	23.29	1	3	3	30	4.18022e+08	0.879455	1.0933	0.794738	129.725	23.29	6	30	219	23.2149	5.87158
21225487	hypothetical protein SCO7210 [Streptomyces coelicolor A3(2)]	5.88	1	1	1	4	2.81559e+07	0.879225	0.91447	0.961419	15.5781	5.88	2	4	153	17.8088	5.31299
21223732	F0F1 ATP synthase subunit gamma [Streptomyces coelicolor A3(2)]	29.18	1	8	8	31	8.75234e+07	0.878743	0.862117	0.987515	105.3	29.18	15	31	305	32.9691	6.29053
21219983	dihydroorotate dehydrogenase 2 [Streptomyces coelicolor A3(2)]	3.53	1	1	1	4	2.00583e+07	0.878191	0.753862	1.16487	14.5829	3.53	2	4	368	39.5372	9.71533
21222800	calcium binding protein [Streptomyces coelicolor A3(2)]	74.12	1	8	8	44	1.6862e+08	0.877264	0.992133	0.897697	158.732	74.12	15	44	170	18.1231	4.89404
21221514	urocanate hydratase [Streptomyces coelicolor A3(2)]	1.4	1	1	1	1	1.60828e+07	0.877137	0.968348	0.905769	1.74068	1.4	1	1	572	61.2235	5.33838
32141175	glycosyltransferase, partial [Streptomyces coelicolor A3(2)]	1.84	2	2	3	7	1.68175e+07	0.876939	0.84611	1.03639	15.7768	1.84	5	7	1197	134.889	7.02002
21221461	regulatory protein [Streptomyces coelicolor A3(2)]	2.74	1	1	1	2	1.24503e+07	0.876165	0.82394	1.06334	6.93193	2.74	2	2	329	35.1365	5.32568
21222540	phosphate-binding protein [Streptomyces coelicolor A3(2)]	18.92	1	6	6	26	3.17748e+07	0.876071	0.875677	1.02058	111.782	18.92	12	26	370	38.017	5.04639
21221394	UDP-N-acetylglucosamine 1-carboxyvinyltransferase [Streptomyces coelicolor A3(2)]	7.37	1	3	3	12	1.97162e+07	0.875567	0.95479	0.8453	37.451	7.37	6	12	448	48.1471	6.31592
21219637	hypothetical protein SCO1123 [Streptomyces coelicolor A3(2)]	15.15	1	1	1	1	1.16045e+08	0.875239	0.969251	0.902969	2.81818	15.15	1	1	132	14.6787	8.49951
21224093	regulatory protein [Streptomyces coelicolor A3(2)]	3.6	1	3	3	8	3.8548e+07	0.874858	0.933347	0.977761	20.1541	3.6	6	8	916	97.1406	4.91943
21220218	Ser/Thr protein kinase [Streptomyces coelicolor A3(2)]	3.09	1	1	1	1	2.0754e+07	0.874429	0.819604	1.06685	0	3.09	1	1	550	55.5284	5.92236
21224206	two-component sensor (kinase) [Streptomyces coelicolor A3(2)]	2.17	1	1	1	7	1.48535e+07	0.874237	0.731898	1.1521	16.8618	2.17	2	7	414	44.4687	6.56592
21220653	leucyl aminopeptidase [Streptomyces coelicolor A3(2)]	44.87	1	21	21	144	3.19033e+08	0.873976	0.553213	1.57013	464.337	44.87	41	144	517	51.9649	5.60498
21224407	alpha amylase [Streptomyces coelicolor A3(2)]	8.61	1	4	4	14	1.44953e+07	0.873793	1.08689	0.833418	45.7157	8.61	8	14	581	63.913	5.99854
21223540	hypothetical protein SCO5171 [Streptomyces coelicolor A3(2)]	46.67	1	2	2	10	7.02454e+07	0.873689	0.860796	1.01494	43.3016	46.67	4	10	75	8.25865	3.96729
21220158	hypothetical protein SCO1662 [Streptomyces coelicolor A3(2)]	2.1	1	1	1	3	9.87822e+06	0.873552	0.959833	0.91007	0	2.1	2	3	333	35.7189	4.67822
21224751	inositol monophosphatase [Streptomyces coelicolor A3(2)]	3.56	1	1	1	1	0	0.873141	0.994054	0.878327	1.66371	3.56	1	1	281	30.0532	5.16064
21221350	hypothetical protein SCO2903 [Streptomyces coelicolor A3(2)]	14.18	1	2	2	6	3.63692e+07	0.872788	0.787173	1.10222	19.027	14.18	4	6	134	14.174	4.51318
21222529	hypothetical protein SCO4130 [Streptomyces coelicolor A3(2)]	2.63	1	1	1	8	14511381	0.872484	0.752631	1.16271	22.4689	2.63	2	8	266	27.5217	6.81494
21221227	acetyl/propionyl CoA carboxylase subunit beta [Streptomyces coelicolor A3(2)]	9.11	1	2	2	5	7.20234e+08	0.871585	1.06647	0.817225	12.26	9.11	4	5	538	57.3772	6.07471
21221414	cell division ATP-binding protein [Streptomyces coelicolor A3(2)]	5.24	1	1	1	2	0	0.870654	0.871098	0.999449	6.62414	5.24	2	2	229	25.6767	10.0229
21223475	hypothetical protein SCO5104 [Streptomyces coelicolor A3(2)]	4.55	2	2	3	11	8.94416e+06	0.870631	0.892937	0.923821	35.1278	4.55	5	11	880	94.7204	4.99561
21221362	hypothetical protein SCO2915 [Streptomyces coelicolor A3(2)]	12.38	1	2	2	5	1.1136e+08	0.870618	0.860327	1.01192	17.0426	12.38	3	5	202	21.9001	4.41162
21219206	integral membrane sensor protein [Streptomyces coelicolor A3(2)]	1.04	1	1	1	1	0	0.870537	0.735545	1.18348	0	1.04	1	1	864	92.3776	5.17334
21221230	acyl-CoA dehydrogenase [Streptomyces coelicolor A3(2)]	4.15	1	2	2	6	4.80893e+07	0.870257	1.05439	0.825213	12.5509	4.15	4	6	386	41.7002	5.33838
21224568	allantoinase [Streptomyces coelicolor A3(2)]	13.93	1	4	4	15	4.96319e+07	0.869231	1.03125	0.853453	54.9242	13.93	8	15	445	47.4623	5.41455
21220142	hypothetical protein SCO1646 [Streptomyces coelicolor A3(2)]	75	1	4	4	26	2.41846e+08	0.868545	0.744402	1.1046	113.741	75	7	26	72	7.97171	4.17041
21222578	hypothetical protein SCO4181 [Streptomyces coelicolor A3(2)]	16.2	1	4	4	9	1.33761e+07	0.868259	0.827046	1.1629	27.4894	16.2	7	9	321	34.653	5.88428
21220260	pseudouridine synthase [Streptomyces coelicolor A3(2)]	10.24	1	4	4	12	2.08863e+07	0.868106	0.665572	1.18658	19.9381	10.24	8	12	371	40.7699	9.84717
21223785	6-phosphofructokinase [Streptomyces coelicolor A3(2)]	40.47	1	9	9	40	8.68847e+07	0.867957	1.06075	0.81856	154.692	40.47	18	40	341	36.4105	5.84619
21224389	hypothetical protein SCO6059 [Streptomyces coelicolor A3(2)]	6.08	1	1	1	2	3.76898e+07	0.867927	0.962052	0.902125	6.4996	6.08	2	2	181	19.641	5.18604
21222217	hydrolase [Streptomyces coelicolor A3(2)]	25	1	5	5	20	3.26756e+07	0.867873	0.971503	0.836118	78.7266	25	9	20	264	28.4757	5.19873
21222441	deaminase [Streptomyces coelicolor A3(2)]	13.29	1	1	1	2	1.82997e+07	0.867623	0.935156	0.927746	8.69715	13.29	2	2	143	15.1498	5.90967
21221069	rod shape-determining protein MreB [Streptomyces coelicolor A3(2)]	25.07	1	7	7	28	6.08726e+07	0.867259	0.729953	1.23157	89.5597	25.07	14	28	343	36.5134	5.93506
21222081	solute-binding protein [Streptomyces coelicolor A3(2)]	59.95	2	17	17	81	9.04181e+07	0.86709	0.548272	1.5586	262.996	59.95	33	81	372	39.702	4.77979
21223397	oxidoreductase [Streptomyces coelicolor A3(2)]	8.28	1	1	1	6	3.94184e+07	0.866753	1.02266	0.914871	21.2375	8.28	2	6	290	30.6993	5.75732
21222858	hypothetical protein SCO4471 [Streptomyces coelicolor A3(2)]	34.26	1	11	11	61	2.23286e+08	0.866122	0.91575	1.00563	169.131	34.26	21	61	432	46.9764	7.94287
21221538	cytochrome P450 hydroxylase [Streptomyces coelicolor A3(2)]	2.77	1	1	1	4	874887	0.865677	0.970525	0.89193	0	2.77	2	4	433	47.3224	6.63916
21223261	sugar ABC transporter integral membrane protein [Streptomyces coelicolor A3(2)]	4.55	1	1	1	4	1.12755e+07	0.865573	0.745811	1.16053	16.1468	4.55	2	4	374	39.2961	7.06396
21220133	hypothetical protein SCO1637 [Streptomyces coelicolor A3(2)]	2.84	1	1	1	10	5.99064e+06	0.865367	0.740295	1.18996	21.608	2.84	2	10	317	35.2434	6.22705
21223281	transcriptional regulator [Streptomyces coelicolor A3(2)]	5.33	1	1	1	4	1.18884e+07	0.864592	0.819254	1.0553	17.9392	5.33	2	4	225	25.0915	5.79541
21219888	hypothetical protein SCO1384 [Streptomyces coelicolor A3(2)]	23.97	1	4	4	27	2.85557e+08	0.863637	0.935957	0.797179	107.462	23.97	8	27	267	28.1328	6.78564
21219549	hypothetical protein SCO1033 [Streptomyces coelicolor A3(2)]	13.83	1	1	1	1	1.52432e+07	0.863627	0.697111	1.23882	0	13.83	1	1	94	10.2253	7.26904
21224775	citratelyase [Streptomyces coelicolor A3(2)]	25.96	1	5	5	24	3.53283e+07	0.863616	0.964	0.886326	105.336	25.96	10	24	339	37.2228	5.57959
21221225	acyl-CoA dehydrogenase [Streptomyces coelicolor A3(2)]	9.87	1	3	3	14	3.59457e+07	0.862766	1.1662	0.772661	52.7767	9.87	6	14	385	42.2272	5.60498
21222929	hypothetical protein SCO4545 [Streptomyces coelicolor A3(2)]	12.17	1	4	4	16	2.52305e+07	0.862406	0.967267	0.927568	53.5119	12.17	8	16	304	34.0774	4.97021
21219231	hypothetical protein SCO0705 [Streptomyces coelicolor A3(2)]	66.18	1	12	12	64	1.48438e+08	0.862171	1.234	0.70058	242.367	66.18	24	64	272	30.5834	5.16064
21219148	hypothetical protein SCO0615 [Streptomyces coelicolor A3(2)]	22.37	1	2	2	8	3.50857e+07	0.862134	0.688714	1.14453	29.6436	22.37	4	8	152	15.8397	7.18115
21222792	hypothetical protein SCO4402 [Streptomyces coelicolor A3(2)]	8.43	1	1	1	6	1.78208e+07	0.86182	0.838874	1.05291	20.7223	8.43	2	6	166	18.6042	5.5542
21223734	F0F1 ATP synthase subunit epsilon [Streptomyces coelicolor A3(2)]	36.29	1	2	2	8	5.38877e+07	0.861785	0.915988	0.94901	35.9611	36.29	4	8	124	13.0098	5.49072
21224205	two-component regulator CutR [Streptomyces coelicolor A3(2)]	57.6	1	10	10	64	2.2623e+08	0.861572	0.831896	1.03681	246.15	57.6	20	64	217	23.8997	5.021
21220009	histidyl-tRNA synthetase [Streptomyces coelicolor A3(2)]	26.59	1	8	10	28	113033374	0.860613	0.915996	0.951739	67.9953	26.59	17	28	425	46.479	5.17334
21223069	hypothetical protein SCO4689 [Streptomyces coelicolor A3(2)]	80	1	6	6	140	2.31685e+09	0.860532	0.895659	0.966114	430.143	80	12	140	110	11.5841	6.80029
21219703	hypothetical protein SCO1192 [Streptomyces coelicolor A3(2)]	22.95	1	3	3	8	2.28203e+07	0.860496	1.41689	0.629259	22.9413	22.95	5	8	122	13.5327	4.97021
21219917	ankyrin [Streptomyces coelicolor A3(2)]	23.13	1	2	2	8	3.15503e+07	0.859793	1.0009	0.872796	32.6601	23.13	4	8	134	14.0672	4.90674
21221037	hypothetical protein SCO2578 [Streptomyces coelicolor A3(2)]	1.69	1	1	1	2	0	0.859193	0.831402	1.03338	1.71671	1.69	2	2	592	62.2505	4.83057
21220017	hypothetical protein SCO1517 [Streptomyces coelicolor A3(2)]	76.33	1	13	13	106	3.05493e+08	0.85888	0.669488	1.28117	384.204	76.33	25	106	169	17.7587	4.53857
21220016	preprotein translocase subunit SecD [Streptomyces coelicolor A3(2)]	10.18	1	4	4	16	3.84623e+07	0.858047	0.738253	1.17783	66.2128	10.18	8	16	570	59.4746	6.26514
21220911	hypothetical protein SCO2447 [Streptomyces coelicolor A3(2)]	26.14	1	3	3	20	9.44147e+07	0.857248	1.09926	0.78576	78.2473	26.14	6	20	153	15.9821	4.90674
21224095	two-component regulator [Streptomyces coelicolor A3(2)]	4.02	1	1	1	8	1.6632e+07	0.856779	0.80221	1.07401	24.9621	4.02	2	8	224	24.0867	5.65576
21221539	nucleoside triphosphate pyrophosphohydrolase [Streptomyces coelicolor A3(2)]	4	1	1	1	2	10757177	0.856491	0.865976	0.989006	6.31546	4	2	2	325	34.7718	4.85596
21221640	MarR family transcriptional regulator [Streptomyces coelicolor A3(2)]	5.52	1	1	1	1	579022	0.856313	0.696053	1.23019	0	5.52	1	1	163	18.8368	8.17725
21220568	UDP-N-acetylmuramoylalanyl-D-glutamyl-2,6-diaminopimelate- D-alanyl-alanyl ligase [Streptomyces coelicolor A3(2)]	19.11	1	5	5	22	4.00516e+07	0.85612	0.98185	0.869346	70.5656	19.11	10	22	471	48.9385	5.5415
21219992	elongation factor P [Streptomyces coelicolor A3(2)]	32.98	1	8	8	39	1.66422e+08	0.855754	1.02019	0.82747	106.208	32.98	15	39	188	20.6365	5.14795
21222635	ABC transporter ATP-binding protein [Streptomyces coelicolor A3(2)]	4.76	1	2	2	8	3.14251e+07	0.854643	0.930104	0.932339	17.2948	4.76	4	8	378	40.3709	6.15088
21222923	hypothetical protein SCO4539 [Streptomyces coelicolor A3(2)]	8.46	1	2	2	3	5.34171e+06	0.854205	0.868708	0.983264	6.24002	8.46	3	3	201	21.782	4.89404
21221518	cystathionine beta-synthase [Streptomyces coelicolor A3(2)]	26.03	1	8	8	36	7.87708e+07	0.853936	0.958822	0.879116	134.318	26.03	15	36	461	48.9337	5.021
21221708	MerR family transcriptional regulator [Streptomyces coelicolor A3(2)]	30.67	1	4	5	14	4.5957e+07	0.851973	0.836967	1.02737	41.7268	30.67	8	14	150	16.9306	5.05908
21224533	OHCU decarboxylase [Streptomyces coelicolor A3(2)]	18.32	1	2	2	6	1.55384e+07	0.851031	1.05865	0.803846	12.4993	18.32	4	6	191	20.4363	5.2749
21221049	hypothetical protein SCO2591 [Streptomyces coelicolor A3(2)]	3.82	1	2	2	4	1.23068e+07	0.850926	0.867942	0.980354	11.6564	3.82	3	4	576	61.5474	5.32568
21222411	tetR family regulatory protein [Streptomyces coelicolor A3(2)]	7.29	1	1	1	4	1.69457e+07	0.850237	0.832132	1.02171	14.2206	7.29	2	4	192	21.2591	6.13818
21220195	hypothetical protein SCO1700 [Streptomyces coelicolor A3(2)]	19.23	1	1	1	10	153148328	0.849416	0.58899	1.44832	16.3052	19.23	2	10	104	11.282	9.31982
21220981	hypothetical protein SCO2520 [Streptomyces coelicolor A3(2)]	9.81	1	3	3	8	1.96597e+07	0.848939	0.781714	1.0988	29.9556	9.81	5	8	377	42.3355	4.97021
21223956	hypothetical protein SCO5601 [Streptomyces coelicolor A3(2)]	30.39	1	4	4	14	3.86518e+07	0.848639	1.12611	0.854953	40.6532	30.39	8	14	102	12.2971	4.70361
21223908	isopropylmalate isomerase large subunit [Streptomyces coelicolor A3(2)]	10.71	1	5	5	17	2.12697e+07	0.845723	0.866793	0.979673	53.9616	10.71	9	17	476	50.4485	5.08447
32141162	bifunctional glutamine-synthetase adenylyltransferase/deadenyltransferase [Streptomyces coelicolor A3(2)]	3.1	1	1	2	3	1.00893e+07	0.844845	0.830615	1.01709	10.0485	3.1	3	3	999	108.71	6.59521
21223269	RNA polymerase factor sigma-70 [Streptomyces coelicolor A3(2)]	20.66	1	5	5	12	2.53301e+07	0.844578	1.10994	0.721327	39.331	20.66	9	12	334	36.7986	4.97021
21221124	hypothetical protein SCO2668 [Streptomyces coelicolor A3(2)]	15.04	1	6	6	18	2.13921e+07	0.844445	0.836117	1.00597	65.2363	15.04	11	18	452	46.9579	5.65576
21218946	2-haloalkanoic acid dehalogenase [Streptomyces coelicolor A3(2)]	14.23	1	2	2	8	2.35382e+07	0.842994	0.866625	0.959141	31.5718	14.23	4	8	246	25.9615	5.97314
21220839	pyruvate dehydrogenase subunit E1 [Streptomyces coelicolor A3(2)]	49.35	1	38	38	170	1.87642e+08	0.842617	1.00992	0.83886	503.479	49.35	75	170	918	102.3	6.27783
21218951	spore-associated protein [Streptomyces coelicolor A3(2)]	16.88	1	2	2	8	8.85124e+07	0.842539	0.800289	1.0455	31.7612	16.88	4	8	154	15.6315	8.1333
21221961	integral membrane protein with kinase activity [Streptomyces coelicolor A3(2)]	9.27	1	8	8	28	2.27237e+07	0.842031	0.705699	1.21219	83.8294	9.27	16	28	1089	115.671	5.51611
21225595	oxidoreductase [Streptomyces coelicolor A3(2)]	1.66	1	1	1	2	4.44551e+06	0.841834	0.777318	1.08295	5.56044	1.66	2	2	481	51.9515	9.0708
21220496	pyruvate kinase [Streptomyces coelicolor A3(2)]	25.73	1	9	9	32	5.02441e+07	0.841323	0.855998	0.97144	117.709	25.73	17	32	478	51.5635	5.60498
21223244	methylmalonyl CoA mutase [Streptomyces coelicolor A3(2)]	35.77	2	13	13	64	1.19892e+08	0.841297	0.95891	0.846433	251.132	35.77	26	64	534	58.1665	5.021
21220570	cell division protein [Streptomyces coelicolor A3(2)]	7.19	1	1	2	2	5860793	0.841049	0.924368	0.909826	1.80102	7.19	2	2	654	69.4202	9.48096
21223945	hypothetical protein SCO5590 [Streptomyces coelicolor A3(2)]	6.06	1	1	1	4	1.68391e+07	0.840957	0.710435	1.18367	16.3412	6.06	2	4	198	21.1238	8.66064
21221828	hydroxymethyldihydropteridine pyrophosphokinase [Streptomyces coelicolor A3(2)]	14.29	1	2	2	12	3.93159e+07	0.84039	1.0801	0.805502	49.6829	14.29	4	12	203	21.7783	4.83057
21222250	hypothetical protein SCO3841 [Streptomyces coelicolor A3(2)]	5.5	1	2	2	4	3.91461e+06	0.839183	0.895015	0.937579	11.4215	5.5	4	4	509	53.0511	6.55127
21223814	glycosyl hydrolase [Streptomyces coelicolor A3(2)]	1.02	1	1	1	1	8.6825e+06	0.838043	1.09142	0.767814	1.82058	1.02	1	1	782	85.9963	6.65381
21220272	DNA repair protein [Streptomyces coelicolor A3(2)]	4.9	1	2	3	7	8.22851e+06	0.837658	0.783517	1.06905	20.2176	4.9	5	7	572	59.8012	4.86865
21221097	aspartate-semialdehyde dehydrogenase [Streptomyces coelicolor A3(2)]	13.24	1	3	3	7	2.53352e+07	0.837489	0.851911	1.00477	24.6633	13.24	5	7	340	35.7737	5.18604
21223909	isopropylmalate isomerase small subunit [Streptomyces coelicolor A3(2)]	15.23	1	2	2	10	3.25537e+07	0.836698	0.897088	0.908346	30.3868	15.23	4	10	197	22.1994	5.22412
21222944	hypothetical protein SCO4561 [Streptomyces coelicolor A3(2)]	8.3	1	1	1	4	69474569	0.836207	0.607891	1.37553	19.0974	8.3	2	4	277	27.6771	9.39307
21225412	hypothetical protein SCO7130 [Streptomyces coelicolor A3(2)]	9.54	1	2	2	4	20151042	0.836149	0.842347	0.992601	15.0797	9.54	4	4	262	29.5678	5.13525
21222625	response regulator [Streptomyces coelicolor A3(2)]	48.88	1	11	11	40	6.30543e+07	0.834928	0.890617	0.930645	127.431	48.88	20	40	223	24.713	5.21143
21224226	hypothetical protein SCO5884 [Streptomyces coelicolor A3(2)]	2.7	1	1	1	1	2.07667e+07	0.834759	0.843939	0.989081	2.09615	2.7	1	1	296	34.0968	6.88818
21225670	binding-protein-dependent transport lipoprotein [Streptomyces coelicolor A3(2)]	53.52	1	13	13	73	2.47371e+08	0.833913	0.850371	1.04764	217.394	53.52	25	73	327	34.0735	4.80518
21222720	lipoprotein [Streptomyces coelicolor A3(2)]	19.48	1	3	3	18	161624374	0.833881	0.750238	1.11323	59.2502	19.48	6	18	154	16.4682	5.07178
21224201	FAD-dependent oxidoreductase [Streptomyces coelicolor A3(2)]	3.37	1	1	1	4	18468411	0.83296	0.713359	1.16761	15.9876	3.37	2	4	445	49.0369	8.98291
21224239	hypothetical protein SCO5898 [Streptomyces coelicolor A3(2)]	42.92	1	2	2	2	6.82416e+07	0.832943	1.0208	0.815933	0	42.92	2	2	226	25.3089	7.41553
32141216	acyl-CoA dehydrogenase, partial [Streptomyces coelicolor A3(2)]	39.64	2	17	17	59	5.39515e+07	0.832905	0.969222	0.856056	197.214	39.64	33	59	608	66.4346	5.16064
21221782	hypothetical protein SCO3353 [Streptomyces coelicolor A3(2)]	17.46	1	2	2	6	1.25732e+07	0.832893	0.738274	1.12812	20.2945	17.46	4	6	126	13.3075	7.07861
21223301	ligase [Streptomyces coelicolor A3(2)]	2.41	1	1	1	2	4.2384e+06	0.832722	0.841098	0.990001	3.86595	2.41	2	2	291	30.5269	5.32568
21225637	oxidoreductase [Streptomyces coelicolor A3(2)]	3.42	1	1	1	4	5.51242e+06	0.831149	0.744326	1.1166	10.9147	3.42	2	4	263	26.3536	5.26221
21221561	ribose-phosphate pyrophosphokinase [Streptomyces coelicolor A3(2)]	27.78	1	5	5	26	9.75091e+07	0.830157	0.928546	0.932787	75.3566	27.78	10	26	324	35.2493	6.45557
21221848	hypothetical protein SCO3421 [Streptomyces coelicolor A3(2)]	4.74	1	1	1	6	9195624	0.830101	0.818987	1.00289	26.4608	4.74	2	6	274	30.9049	5.43994
21219061	oxidoreductase [Streptomyces coelicolor A3(2)]	4.69	1	1	1	2	0	0.829944	0.99065	0.837742	9.48206	4.69	2	2	277	30.3525	5.71924
21219851	3-ketoacyl-ACP reductase [Streptomyces coelicolor A3(2)]	5.14	1	1	1	4	1.07754e+07	0.829869	0.947202	0.876091	15.1189	5.14	2	4	253	26.2547	5.64307
21223547	molybdopterin biosynthesis-like protein MoeZ [Streptomyces coelicolor A3(2)]	24.74	1	7	7	34	1.23667e+08	0.82849	0.906242	0.940701	131.981	24.74	14	34	392	42.6077	4.75439
21220325	stress-like protein [Streptomyces coelicolor A3(2)]	45	1	7	7	28	1.15081e+08	0.827871	0.688076	1.18256	96.3406	45	12	28	160	16.8595	4.97021
21219129	DNA-binding protein [Streptomyces coelicolor A3(2)]	25.13	1	3	3	11	1.83234e+07	0.827411	0.850785	0.984705	31.3832	25.13	5	11	187	20.0403	5.24951
21223306	histidine ammonia-lyase [Streptomyces coelicolor A3(2)]	17.58	1	7	7	28	3.4592e+07	0.827003	0.79202	1.05438	101.129	17.58	14	28	512	52.7433	6.04932
21219167	ABC transporter ATP-binding protein [Streptomyces coelicolor A3(2)]	2.94	1	2	2	3	178524629	0.826715	0.743695	1.11159	4.01665	2.94	2	3	544	59.25	5.60498
21223801	trehalose synthase [Streptomyces coelicolor A3(2)]	1.94	1	1	1	6	2.43603e+07	0.825573	0.941262	0.891327	16.6181	1.94	2	6	566	65.2249	4.93213
32141302	SIR2 family transcriptional regulator, partial [Streptomyces coelicolor A3(2)]	2.9	1	1	1	2	3.48954e+06	0.82526	0.788308	1.04683	5.03932	2.9	2	2	241	25.5041	5.66846
21220834	hypothetical protein SCO2366 [Streptomyces coelicolor A3(2)]	3.42	1	1	1	4	47867559	0.824605	0.706221	1.16758	19.3232	3.42	2	4	380	41.0406	5.07178
21224687	hypothetical protein SCO6375 [Streptomyces coelicolor A3(2)]	54.09	1	7	7	26	1.38196e+08	0.824479	0.92315	0.991013	92.1003	54.09	14	26	220	22.3485	9.01221
21221743	hypothetical protein SCO3312 [Streptomyces coelicolor A3(2)]	8.09	1	1	1	1	1.06035e+07	0.823813	1.04839	0.785754	0	8.09	1	1	136	14.5834	5.75732
21221817	two component system response regulator [Streptomyces coelicolor A3(2)]	10.71	1	2	2	10	2.22426e+07	0.822953	0.968307	0.819308	31.2812	10.71	4	10	224	24.1439	6.0874
21223509	hypothetical protein SCO5140 [Streptomyces coelicolor A3(2)]	44.84	1	7	7	34	8.86467e+07	0.822879	0.889799	1.02421	106.076	44.84	12	34	252	27.4352	5.24951
21222232	hypothetical protein SCO3822 [Streptomyces coelicolor A3(2)]	41.9	1	7	7	38	3.81267e+08	0.821978	0.943826	0.866088	126.332	41.9	14	38	179	19.5229	4.66553
21220143	hypothetical protein SCO1647 [Streptomyces coelicolor A3(2)]	8.65	1	5	5	19	2.95958e+07	0.821147	0.901295	0.886282	40.0389	8.65	9	19	497	56.2865	5.68115
21223822	hypothetical protein SCO5464 [Streptomyces coelicolor A3(2)]	81.43	1	5	5	60	5.52946e+08	0.818891	0.864275	0.906568	242.585	81.43	10	60	70	7.73776	4.41162
21219714	succinic semialdehyde dehydrogenase [Streptomyces coelicolor A3(2)]	5.21	1	2	2	6	1.06189e+07	0.818824	0.832391	0.98366	25.38	5.21	4	6	461	49.9901	5.09717
21220493	branched-chain amino acid ABC transporter ATP-binding protein [Streptomyces coelicolor A3(2)]	3.56	1	1	1	4	1.17098e+07	0.816882	0.756269	1.0801	15.3996	3.56	2	4	309	32.8679	5.09717
21220299	hypothetical protein SCO1809 [Streptomyces coelicolor A3(2)]	35.47	1	4	4	25	6.37765e+07	0.816573	0.893534	0.919655	77.439	35.47	8	25	172	19.2068	5.43994
21220831	ATP/GTP-binding protein [Streptomyces coelicolor A3(2)]	3.61	1	2	2	6	4.45054e+06	0.816306	0.774648	1.05373	11.25	3.61	4	6	388	42.9653	6.06201
21220285	hypothetical protein SCO1794 [Streptomyces coelicolor A3(2)]	27.37	1	4	4	21	1.52724e+08	0.816229	0.995718	0.745617	63.7003	27.37	8	21	179	19.1463	5.17334
21219141	regulatory protein [Streptomyces coelicolor A3(2)]	46.92	1	10	10	44	9.81373e+07	0.816109	0.50952	1.48723	133.468	46.92	20	44	292	30.2138	10.1401
21223960	hypothetical protein SCO5605 [Streptomyces coelicolor A3(2)]	40.78	1	4	4	14	5.17774e+07	0.815812	0.766792	1.05673	47.4826	40.78	8	14	103	10.7564	7.92822
21223206	oxidoreductase [Streptomyces coelicolor A3(2)]	3.53	1	2	2	8	1.52384e+07	0.814855	1.14808	0.718204	20.1055	3.53	4	8	510	55.9111	5.08447
21221458	hypothetical protein SCO3015 [Streptomyces coelicolor A3(2)]	3.68	1	1	1	3	25044969	0.811572	0.665678	1.21912	7.74927	3.68	2	3	462	46.2003	5.51611
21220475	hypothetical protein SCO1993 [Streptomyces coelicolor A3(2)]	53.07	1	9	9	35	6.60163e+07	0.81152	1.44893	0.561138	130.912	53.07	17	35	228	24.8316	5.08447
21222890	cold shock protein [Streptomyces coelicolor A3(2)]	74.63	1	2	3	118	1.28863e+09	0.811446	1.26516	0.643016	531.411	74.63	6	118	67	7.18348	4.80518
21223521	ATP-binding protein [Streptomyces coelicolor A3(2)]	35.54	1	5	5	13	3.75268e+07	0.811182	0.808791	0.992732	46.6576	35.54	9	13	377	38.9632	5.33838
21219605	phosphodiesterase [Streptomyces coelicolor A3(2)]	4.85	1	1	1	6	1.70117e+07	0.810324	0.833665	0.965864	18.5294	4.85	2	6	227	24.7961	5.65576
21220983	hypothetical protein SCO2522 [Streptomyces coelicolor A3(2)]	2.84	1	1	1	4	7.61695e+06	0.810064	1.04797	0.772953	14.2631	2.84	2	4	317	34.7377	6.04932
21224188	hypothetical protein SCO5844 [Streptomyces coelicolor A3(2)]	2.27	1	1	1	2	1.19473e+07	0.809998	0.938445	0.863092	5.00721	2.27	2	2	397	42.5202	5.09717
21221471	phosphomannomutase [Streptomyces coelicolor A3(2)]	3.52	1	1	1	4	2.58492e+07	0.809904	0.970798	0.834231	16.9467	3.52	2	4	454	48.2262	5.0083
21223843	pyridoxal-phosphate-dependent aminotransferase [Streptomyces coelicolor A3(2)]	7.2	1	3	3	7	8.68485e+07	0.809877	0.897496	0.910894	12.8494	7.2	5	7	389	40.3286	5.35107
21222084	heat shock protein GrpE [Streptomyces coelicolor A3(2)]	36.89	1	5	5	17	9.74173e+07	0.809838	0.837179	0.914646	74.3002	36.89	9	17	225	23.8597	4.48779
21222458	alcohol dehydrogenase [Streptomyces coelicolor A3(2)]	25.2	1	7	7	38	5.16893e+07	0.809298	0.85947	0.947017	132.694	25.2	14	38	377	40.006	5.36377
21220638	hypothetical protein SCO2161 [Streptomyces coelicolor A3(2)]	46.61	1	7	7	35	8.28087e+07	0.808659	0.883821	0.910737	95.7782	46.61	13	35	118	12.382	4.4624
21224085	dihydrodipicolinate reductase [Streptomyces coelicolor A3(2)]	12.4	1	2	2	8	1.75585e+07	0.807226	0.82895	0.973085	31.7252	12.4	4	8	250	26.0656	6.21436
21220854	ACP S-malonyltransferase [Streptomyces coelicolor A3(2)]	33.54	1	6	7	60	9.9348e+07	0.806519	1.04878	0.72697	216.459	33.54	14	60	316	32.0578	5.17334
21222543	polyphosphate kinase [Streptomyces coelicolor A3(2)]	2.58	1	1	1	2	5.84092e+06	0.806299	1.07624	0.749152	3.6781	2.58	2	2	774	86.3418	6.56592
21221339	hypothetical protein SCO2892 [Streptomyces coelicolor A3(2)]	14.98	1	5	5	24	2.53429e+07	0.803966	0.641809	1.21203	90.5086	14.98	10	24	454	47.4783	7.81104
21223444	hydroxylacyl-CoA dehydrogenase [Streptomyces coelicolor A3(2)]	46.58	1	11	11	64	3.43694e+08	0.802248	0.74902	1.06041	210.599	46.58	22	64	307	33.2407	6.23975
21221989	transcriptional regulator [Streptomyces coelicolor A3(2)]	43.75	1	8	8	46	1.10082e+08	0.8016	0.847962	0.942811	134.313	43.75	16	46	224	24.6601	6.16357
32141173	2-isopropylmalate synthase [Streptomyces coelicolor A3(2)]	22.86	1	11	11	44	4.59012e+07	0.800883	0.974489	0.803353	123.047	22.86	21	44	573	63.2835	4.99561
21222601	hypothetical protein SCO4205 [Streptomyces coelicolor A3(2)]	22.62	1	2	2	5	1.39559e+07	0.800707	0.926367	0.864316	13.2092	22.62	3	5	168	18.7188	5.41455
32141269	ATP/GTP binding protein, partial [Streptomyces coelicolor A3(2)]	1.33	1	1	1	1	5.5485e+06	0.799081	0.738792	1.08156	2.15597	1.33	1	1	676	72.0129	9.08545
21223055	hypothetical protein SCO4674 [Streptomyces coelicolor A3(2)]	51.72	1	5	5	17	1.35531e+08	0.795107	0.886983	0.912531	50.5773	51.72	10	17	145	15.6767	4.7417
21220068	argininosuccinate lyase [Streptomyces coelicolor A3(2)]	28.63	1	11	11	47	5.0979e+07	0.794377	0.989815	0.812343	161.625	28.63	22	47	475	50.9101	5.52881
21221787	two-component system response regulator [Streptomyces coelicolor A3(2)]	25.21	1	4	4	14	3.18604e+07	0.793952	0.866463	0.921002	44.8581	25.21	8	14	234	25.3661	5.05908
21221750	glutamyl-tRNA reductase [Streptomyces coelicolor A3(2)]	2.75	1	1	1	3	26247647	0.791781	0.927308	0.853813	9.70305	2.75	2	3	581	60.5252	5.05908
21223140	co-chaperonin GroES [Streptomyces coelicolor A3(2)]	93.14	1	9	9	142	3.71279e+09	0.79144	0.666504	1.16705	485.097	93.14	18	142	102	10.9398	4.75439
21220348	hypothetical protein SCO1860 [Streptomyces coelicolor A3(2)]	45.07	1	10	10	43	5.51273e+07	0.790781	1.47633	0.52353	160.472	45.07	20	43	335	33.4365	5.97314
21220165	ATP/GTP-binding protein [Streptomyces coelicolor A3(2)]	29.91	1	9	9	40	47208786	0.789567	1.21392	0.656883	129.989	29.91	16	40	351	37.9045	5.92236
21222160	cold shock protein [Streptomyces coelicolor A3(2)]	34.33	1	2	3	19	8.49465e+08	0.786232	1.06468	0.7487	53.3828	34.33	6	19	67	7.18549	5.17334
21223911	histone-like DNA binding protein [Streptomyces coelicolor A3(2)]	12.39	1	2	2	8	2.66148e+07	0.785159	0.877703	0.904436	35.7296	12.39	4	8	218	22.3348	11.2095
21222950	NADH dehydrogenase subunit NuoF [Streptomyces coelicolor A3(2)]	12.92	1	6	6	19	7.95386e+07	0.783255	0.911753	0.831062	33.4232	12.92	11	19	449	48.8173	5.71924
21223063	glutamate dehydrogenase [Streptomyces coelicolor A3(2)]	65.29	1	20	20	129	6.13032e+08	0.781437	1.10548	0.673068	376.359	65.29	38	129	461	49.4509	5.37646
21223631	hypothetical protein SCO5264 [Streptomyces coelicolor A3(2)]	2.5	1	1	1	2	6.20681e+06	0.780899	0.624138	1.25111	6.56608	2.5	2	2	360	40.0502	5.94775
21223535	helicase [Streptomyces coelicolor A3(2)]	5.46	1	1	1	2	1.05891e+07	0.774471	0.736263	1.05185	7.34786	5.46	2	2	879	92.4123	9.5249
21223848	short chain dehydrogenase [Streptomyces coelicolor A3(2)]	25	1	6	6	16	3.91116e+07	0.773892	1.02196	0.719281	31.6522	25	11	16	232	24.4399	7.37158
21225915	oxidoreductase [Streptomyces coelicolor A3(2)]	11.23	2	3	3	13	5.11858e+07	0.773758	1.02686	0.786543	49.6595	11.23	5	13	285	29.9085	5.97314
21223155	Ser/Thr protein kinase [Streptomyces coelicolor A3(2)]	1.12	1	1	1	2	4.91739e+06	0.771331	0.73371	1.05123	5.6804	1.12	2	2	979	100.653	5.47803
21220824	hypothetical protein SCO2356 [Streptomyces coelicolor A3(2)]	3.21	1	1	2	7	5.59859e+07	0.770728	0.633831	1.25454	3.824	3.21	3	7	467	51.1437	7.81104
21222280	hypothetical protein SCO3872 [Streptomyces coelicolor A3(2)]	6.49	1	1	1	6	1.86389e+07	0.769278	0.588532	1.30706	20.4551	6.49	2	6	185	19.529	8.86572
21223402	hypothetical protein SCO5029 [Streptomyces coelicolor A3(2)]	3.78	1	1	1	8	3.37923e+07	0.768976	0.699593	1.09997	19.8763	3.78	2	8	238	25.1683	7.94287
21223870	ketol-acid reductoisomerase [Streptomyces coelicolor A3(2)]	68.07	2	23	23	168	7.37127e+08	0.767691	0.983314	0.782279	552.284	68.07	43	168	332	36.2313	5.03369
21220578	methyltransferase [Streptomyces coelicolor A3(2)]	6.64	1	2	2	4	7.18738e+06	0.76439	1.10693	0.690523	10.459	6.64	4	4	271	28.0177	6.17627
21224522	hypothetical protein SCO6198 [Streptomyces coelicolor A3(2)]	0.69	1	1	1	4	6.62498e+06	0.763261	0.950465	0.803006	13.327	0.69	2	4	1156	116.649	5.40186
32141137	adenylosuccinate lyase [Streptomyces coelicolor A3(2)]	26.67	1	10	10	35	4.30969e+07	0.763147	0.9929	0.753079	118.076	26.67	20	35	480	51.7312	6.23975
32141176	hypothetical protein SCO2616 [Streptomyces coelicolor A3(2)]	3.58	1	1	1	2	8.45004e+06	0.762637	0.943428	0.808334	8.06149	3.58	2	2	335	34.5859	5.021
21222536	phosphate transport protein [Streptomyces coelicolor A3(2)]	16.57	1	1	1	1	9.71417e+06	0.759688	0.546123	1.391	3.79613	16.57	1	1	332	34.8763	9.70068
21223664	penicillin-binding protein [Streptomyces coelicolor A3(2)]	1.65	1	1	1	1	2.78209e+06	0.757941	0.680258	1.11415	0	1.65	1	1	485	50.2378	8.95361
21221804	Lsr2-like protein [Streptomyces coelicolor A3(2)]	30.63	1	3	3	18	8.45253e+07	0.756713	0.324567	2.42493	68.4016	30.63	6	18	111	11.772	6.81494
21223885	hypothetical protein SCO5530 [Streptomyces coelicolor A3(2)]	4.22	1	2	2	4	7.82699e+06	0.753208	0.693614	1.08587	12.7561	4.22	4	4	450	46.6031	4.91943
21224717	methionine aminopeptidase [Streptomyces coelicolor A3(2)]	8.14	1	1	1	2	1.04525e+07	0.753152	0.846892	0.889275	12.9204	8.14	2	2	258	26.6974	5.42725
21224904	hypothetical protein SCO6606 [Streptomyces coelicolor A3(2)]	3	1	1	1	2	7.49166e+06	0.74773	1.02879	0.726773	6.51855	3	2	2	300	32.7708	5.98584
21225575	stress-inducible protein [Streptomyces coelicolor A3(2)]	3.85	1	1	1	4	2.67222e+07	0.747151	0.756007	0.988244	16.3679	3.85	2	4	312	32.3327	6.29053
21225348	hypothetical protein SCO7065 [Streptomyces coelicolor A3(2)]	17.07	1	2	2	8	3.37057e+07	0.74397	0.678064	1.12665	29.7539	17.07	4	8	123	13.5725	4.79248
21222555	protease [Streptomyces coelicolor A3(2)]	2.02	1	1	1	6	1.49358e+07	0.740551	0.538022	1.32707	15.055	2.02	2	6	347	34.8433	4.85596
21221836	inorganic pyrophosphatase [Streptomyces coelicolor A3(2)]	58.28	1	11	11	83	3.45075e+08	0.73745	0.938854	0.801897	190.515	58.28	21	83	163	18.6821	4.91943
21219434	hypothetical protein SCO0915 [Streptomyces coelicolor A3(2)]	20	1	1	1	6	3.98092e+07	0.736087	1.01676	0.778501	26.5274	20	2	6	85	9.62587	7.53271
21225498	polyketide synthase [Streptomyces coelicolor A3(2)]	54.24	1	16	16	83	3.64932e+08	0.736054	0.766238	0.985667	297.793	54.24	31	83	389	41.6732	5.37646
21224989	hypothetical protein SCO6695 [Streptomyces coelicolor A3(2)]	5.19	1	2	2	8	1.71123e+07	0.730192	0.619495	1.17864	20.7288	5.19	4	8	347	35.2921	4.62744
21220282	hypothetical protein SCO1790 [Streptomyces coelicolor A3(2)]	12.86	1	2	2	3	8.60657e+06	0.728502	0.577104	1.26229	6.58125	12.86	3	3	210	22.7721	4.64014
21225852	oxidoreductase [Streptomyces coelicolor A3(2)]	5.56	1	1	1	2	1.98903e+07	0.727124	0.793661	0.916126	9.1584	5.56	2	2	306	31.5504	6.27783
21220817	hypothetical protein SCO2349 [Streptomyces coelicolor A3(2)]	1.79	1	1	1	6	6378894	0.722586	0.796783	0.909451	4.32131	1.79	2	6	560	61.2481	5.36377
21225306	hypothetical protein SCO7021 [Streptomyces coelicolor A3(2)]	11.17	4	1	2	5	7.87773e+07	0.718676	0.94086	0.763819	3.82193	11.17	3	5	367	38.5639	9.34912
21220562	cell division protein FtsZ [Streptomyces coelicolor A3(2)]	25.06	1	7	7	29	5.45105e+07	0.717721	0.868481	0.837679	101.61	25.06	13	29	399	41.0702	4.60205
21223762	hypothetical protein SCO5402 [Streptomyces coelicolor A3(2)]	6.61	1	1	2	3	4.75994e+06	0.714684	0.75556	0.945861	5.43418	6.61	3	3	257	26.3601	4.31006
21220529	imidazole glycerol phosphate synthase subunit HisF [Streptomyces coelicolor A3(2)]	2.79	1	1	1	4	6.80086e+06	0.71282	0.742333	0.960202	7.77824	2.79	2	4	251	26.5407	5.38916
21223072	hypothetical protein SCO4692 [Streptomyces coelicolor A3(2)]	57.21	1	12	12	59	2.79344e+08	0.711279	0.793831	0.909159	203.482	57.21	22	59	215	23.2879	5.8335
21222646	hypothetical protein SCO4251 [Streptomyces coelicolor A3(2)]	6.21	1	1	1	6	1.98029e+07	0.707734	0.607412	1.18881	20.0746	6.21	2	6	177	18.8364	5.33838
21219984	carbamoyl phosphate synthase large subunit [Streptomyces coelicolor A3(2)]	8.08	1	8	8	33	2.71118e+07	0.707604	0.74083	0.962973	111.321	8.08	16	33	1102	117.835	4.91943
21220052	uroporphyrin-III methyltransferase [Streptomyces coelicolor A3(2)]	9.27	1	2	2	8	4.70904e+07	0.707597	0.942239	0.71979	34.909	9.27	4	8	410	42.6504	6.01123
21224855	integral membrane efflux protein [Streptomyces coelicolor A3(2)]	10.52	1	1	1	1	0	0.70489	0.900285	0.782931	0	10.52	1	1	504	50.499	10.4038
21222969	ABC transporter [Streptomyces coelicolor A3(2)]	3.88	1	1	1	2	8.35311e+06	0.701176	0.612782	1.1442	5.59258	3.88	2	2	309	31.9342	6.56592
21221786	hypothetical protein SCO3357 [Streptomyces coelicolor A3(2)]	3.47	1	1	1	4	4.12538e+06	0.701002	0.557518	1.25731	7.456	3.47	2	4	202	21.0102	4.7417
21221352	hypothetical protein SCO2905 [Streptomyces coelicolor A3(2)]	31.17	1	2	2	10	4.69077e+07	0.698233	0.53889	1.16641	40.4349	31.17	4	10	77	7.89902	4.48779
21223291	purine nucleoside phosphorylase [Streptomyces coelicolor A3(2)]	12.41	1	1	1	6	0	0.6925	1.03506	0.659779	26.6247	12.41	2	6	274	28.4336	5.12256
21220916	two-component sensor histidine kinase [Streptomyces coelicolor A3(2)]	13.47	1	1	1	1	0	0.689602	0.407757	1.69114	0	13.47	1	1	475	50.3455	5.84619
21223798	hypothetical protein SCO5439 [Streptomyces coelicolor A3(2)]	4.77	1	1	1	2	0	0.689081	0.519858	1.32546	0	4.77	1	2	755	82.5614	5.03369
21222946	NADH dehydrogenase subunit B [Streptomyces coelicolor A3(2)]	15.22	1	3	3	6	6.78505e+06	0.689066	0.801022	0.948871	13.0682	15.22	6	6	184	20.0032	7.78174
32141104	alcohol dehydrogenase, partial [Streptomyces coelicolor A3(2)]	3.81	1	1	1	2	1.43003e+07	0.688842	1.1513	0.59829	5.75705	3.81	2	2	341	35.6031	5.33838
21223192	bifunctional phosphoribosylaminoimidazolecarboxamide formyltransferase/IMP cyclohydrolase [Streptomyces coelicolor A3(2)]	59.85	1	19	19	125	3.05856e+08	0.67999	0.912487	0.721551	455.116	59.85	38	125	523	55.009	5.5542
21220483	hypothetical protein SCO2001 [Streptomyces coelicolor A3(2)]	10.89	1	6	6	23	9.16247e+07	0.675794	0.608916	1.12761	73.8868	10.89	11	23	597	61.3305	5.05908
21223056	hypothetical protein SCO4675 [Streptomyces coelicolor A3(2)]	15.56	1	4	4	21	5.12902e+08	0.674467	0.630718	1.02154	68.7496	15.56	8	21	302	33.1762	5.78271
21222320	hypothetical protein SCO3913 [Streptomyces coelicolor A3(2)]	11.33	1	1	1	4	1.80398e+07	0.664534	1.46901	0.45235	18.3081	11.33	2	4	150	16.6677	6.69775
21224260	cold-shock domain-containing protein [Streptomyces coelicolor A3(2)]	44.78	2	2	4	22	1.0117e+09	0.661222	1.03546	0.638551	59.7185	44.78	7	22	67	7.1115	4.88135
21222954	NADH dehydrogenase subunit J [Streptomyces coelicolor A3(2)]	2.46	1	1	1	2	2.27118e+06	0.659809	0.537684	1.22708	6.09854	2.46	2	2	285	30.2001	8.00146
21220270	transcriptional regulator [Streptomyces coelicolor A3(2)]	3.83	1	1	1	1	113873	0.649693	0.876893	0.740872	0	3.83	1	1	548	57.9542	8.11865
21218923	hypothetical protein SCO0380 [Streptomyces coelicolor A3(2)]	10.69	1	1	1	2	7371829	0.648746	0.888855	0.729836	8.43695	10.69	2	2	131	13.8559	5.12256
21222202	hypothetical protein SCO3791 [Streptomyces coelicolor A3(2)]	11.01	1	3	3	10	4.44136e+07	0.645219	0.7615	0.858895	41.9983	11.01	6	10	445	46.5371	4.75439
21219985	carbamoyl phosphate synthase small subunit [Streptomyces coelicolor A3(2)]	2.37	1	1	1	4	2.51083e+07	0.641442	0.632882	1.01348	12.502	2.37	2	4	380	40.8884	5.99854
21222951	NADH dehydrogenase subunit G [Streptomyces coelicolor A3(2)]	14.95	1	8	8	30	3.49153e+07	0.636409	0.77929	0.828665	130.85	14.95	16	30	843	88.8066	5.65576
21223061	short chain dehydrogenase [Streptomyces coelicolor A3(2)]	46.47	1	12	12	142	1.0652e+09	0.628944	0.577855	1.06094	582.519	46.47	24	142	269	27.8293	6.13818
21223862	regulatory protein [Streptomyces coelicolor A3(2)]	0.55	1	1	1	1	2.35765e+07	0.625699	1.07358	0.582792	0	0.55	1	1	1091	116.667	6.50732
21220554	lipoprotein signal peptidase [Streptomyces coelicolor A3(2)]	14.71	1	1	2	3	2.34093e+06	0.624229	0.709812	0.879392	6.99397	14.71	3	3	204	21.9578	5.59229
21223062	tautomerase [Streptomyces coelicolor A3(2)]	82.61	1	4	4	43	1.0735e+09	0.615957	0.618946	0.965017	131.056	82.61	7	43	69	7.34274	5.0083
21223067	hypothetical protein SCO4687 [Streptomyces coelicolor A3(2)]	78.99	1	5	5	268	3367137506	0.611306	0.712813	0.925251	980.935	78.99	10	268	119	12.8934	5.40186
21221536	hypothetical protein SCO3097 [Streptomyces coelicolor A3(2)]	10.66	1	3	3	18	2.27326e+08	0.604825	0.564578	1.05019	52.4161	10.66	6	18	244	24.8623	8.60205
21224068	hypothetical protein SCO5721 [Streptomyces coelicolor A3(2)]	1.18	1	1	1	1	34957.9	0.598078	0.524674	1.13986	2.02063	1.18	1	1	508	53.8824	5.32568
21221470	hypothetical protein SCO3027 [Streptomyces coelicolor A3(2)]	53.57	1	2	2	6	6.30712e+07	0.589497	0.547662	1.08222	21.902	53.57	4	6	56	6.04	4.34814
21223058	hypothetical protein SCO4678 [Streptomyces coelicolor A3(2)]	16.31	2	3	3	8	1.96017e+07	0.56511	0.895719	0.683255	28.853	16.31	6	8	282	31.0281	5.60498
21222967	hypothetical protein SCO4584 [Streptomyces coelicolor A3(2)]	37.38	1	14	14	68	1.38542e+08	0.559384	0.538975	1.05686	246.42	37.38	28	68	420	42.3592	4.66553
21218808	short chain oxidoreductase [Streptomyces coelicolor A3(2)]	41.89	1	7	7	37	8.49463e+07	0.550228	1.19686	0.470105	133.287	41.89	14	37	265	27.7572	5.05908
21223257	peptidase [Streptomyces coelicolor A3(2)]	11.46	1	1	1	1	0	0.528237	1.1934	0.442615	0	11.46	1	1	410	43.6705	5.41455
21220263	hypothetical protein SCO1771 [Streptomyces coelicolor A3(2)]	9.73	1	1	1	4	4.59304e+06	0.528057	0.452752	1.16628	18.8998	9.73	2	4	185	19.2318	6.97607
21223881	urease subunit alpha [Streptomyces coelicolor A3(2)]	1.61	1	1	1	1	6.94851e+07	0.526592	1.12572	0.467764	1.85132	1.61	1	1	558	58.3148	6.15088
21220646	hypothetical protein SCO2172 [Streptomyces coelicolor A3(2)]	50	1	2	2	7	2.33126e+07	0.515758	0.843419	1.04036	19.4173	50	3	7	82	9.04508	3.95459
21218644	hypothetical protein SCO0069 [Streptomyces coelicolor A3(2)]	0.57	1	1	1	2	2.38295e+08				3.66042	0.57	1	2	1052	114.121	6.04932
21218799	hypothetical protein SCO0246 [Streptomyces coelicolor A3(2)]	1.35	1	1	1	1	1.13852e+07				1.98963	1.35	1	1	445	47.0647	4.71631
21218913	hypothetical protein SCO0369 [Streptomyces coelicolor A3(2)]	0.65	1	1	1	1	136687506				1.8566	0.65	1	1	1085	117.205	5.94775
21218960	DNA-binding protein [Streptomyces coelicolor A3(2)]	4.65	1	1	1	2	166776107				5.03461	4.65	1	2	215	21.9132	4.80518
21218965	membrane transport protein [Streptomyces coelicolor A3(2)]	0.92	1	1	1	2	1.52121e+07				1.76215	0.92	1	2	765	79.0852	7.2251
21219042	DEAD/DEAH box helicase [Streptomyces coelicolor A3(2)]	2.73	1	1	1	1	0				1.66791	2.73	1	1	439	46.3186	10.2427
21219250	hypothetical protein SCO0725 [Streptomyces coelicolor A3(2)]	7.2	1	1	1	1	0				2.84442	7.2	1	1	125	14.0936	10.228
21219340	transmembrane transport protein [Streptomyces coelicolor A3(2)]	1.83	1	1	1	3	3.12227e+07				6.79443	1.83	1	3	436	44.4941	10.8726
21219369	oxidoreductase [Streptomyces coelicolor A3(2)]	2.4	1	1	1	1	187183604				3.07426	2.4	1	1	333	33.5626	7.02002
21219783	halogenase [Streptomyces coelicolor A3(2)]	6.67	1	1	1	2	0				0	6.67	2	2	585	66.6462	7.1665
21220059	phosphatase [Streptomyces coelicolor A3(2)]	3.24	1	1	1	1	7.2978e+06				2.37239	3.24	1	1	216	22.8249	4.88135
21220234	hypothetical protein SCO1740 [Streptomyces coelicolor A3(2)]	1.69	1	1	1	1	1.50222e+07				2.16903	1.69	1	1	354	35.9586	8.93896
21220387	integral membrane sugar transport protein [Streptomyces coelicolor A3(2)]	16.44	1	1	1	1	0				4.17478	16.44	1	1	292	30.8869	9.33447
21220478	dephospho-CoA kinase [Streptomyces coelicolor A3(2)]	16	1	1	1	1	39810438				5.10577	16	1	1	200	21.4874	4.81787
21220607	hypothetical protein SCO2130 [Streptomyces coelicolor A3(2)]	2.26	1	1	1	1	2.25818e+07				2.34602	2.26	1	1	265	29.366	6.44287
21220620	two component system response regulator [Streptomyces coelicolor A3(2)]	3.17	1	1	1	1	1.51873e+07				2.15101	3.17	1	1	221	24.7973	9.43701
21220706	hypothetical protein SCO2235 [Streptomyces coelicolor A3(2)]	51.72	1	1	1	1	12122705				0	51.72	1	1	87	9.68679	4.77979
21220910	peptidase [Streptomyces coelicolor A3(2)]	0.49	1	1	1	2	1.38083e+08				1.67534	0.49	1	2	1220	127.235	5.14795
21220962	DNA-binding protein [Streptomyces coelicolor A3(2)]	2.35	1	1	1	1	3.59936e+07				2.2567	2.35	1	1	298	34.0526	8.39697
21221106	4-alpha-glucanotransferase [Streptomyces coelicolor A3(2)]	1.27	1	1	1	2	1.36312e+08				4.43668	1.27	1	2	711	77.0368	6.16357
32141177	sugar-binding protein [Streptomyces coelicolor A3(2)]	1.35	1	1	1	1	0				2.04562	1.35	1	1	445	48.269	5.46533
21221328	hypothetical protein SCO2879 [Streptomyces coelicolor A3(2)]	1.27	1	1	1	1	0				2.53586	1.27	1	1	551	56.1632	7.76709
21221492	hypothetical protein SCO3050 [Streptomyces coelicolor A3(2)]	1.73	1	1	1	1	1.61779e+06				2.10601	1.73	1	1	346	38.729	8.32373
21221967	anti-sigma factor [Streptomyces coelicolor A3(2)]	6.29	1	1	1	2	1.94105e+07				4.78423	6.29	2	2	143	14.9487	4.53857
21221974	hypothetical protein SCO3555 [Streptomyces coelicolor A3(2)]	1.87	1	1	1	3	2.44081e+08				6.19476	1.87	1	3	321	32.1702	10.8286
21222230	Ser/Thr protein kinase [Streptomyces coelicolor A3(2)]	3.45	2	1	2	4	6.28723e+07				7.64531	3.45	4	4	522	53.488	4.66553
21222294	partitioning or sporulation protein [Streptomyces coelicolor A3(2)]	1.83	1	1	1	3	1.04284e+07				5.93231	1.83	2	3	328	35.9349	5.35107
21222468	hypothetical protein SCO4066 [Streptomyces coelicolor A3(2)]	1.96	1	1	1	3	1.00893e+07				5.86636	1.96	1	3	357	39.1451	9.5249
21222546	ABC transporter ATP-binding protein [Streptomyces coelicolor A3(2)]	2.77	1	1	1	1	2.97677e+07				2.08204	2.77	1	1	289	30.9491	7.13721
21223033	lipoprotein [Streptomyces coelicolor A3(2)]	3.9	1	1	1	1	34508171				2.53782	3.9	1	1	282	30.029	5.14795
21223370	hypothetical protein SCO4997 [Streptomyces coelicolor A3(2)]	11.11	1	1	1	1	2.77845e+08				0	11.11	1	1	63	6.74024	4.56396
21223737	chitinase two-component response regulator [Streptomyces coelicolor A3(2)]	3.29	1	1	1	2	225944952				4.56649	3.29	1	2	213	22.5272	5.09717
21223825	transmembrane transport protein [Streptomyces coelicolor A3(2)]	10.59	1	1	1	1	11232665		1.63257		0	10.59	1	1	472	50.1707	9.43701
21223865	oxidoreductase [Streptomyces coelicolor A3(2)]	1.94	1	1	1	1	9.56543e+08				2.3199	1.94	1	1	310	33.9859	9.77393
21224107	ATP-dependent DNA helicase [Streptomyces coelicolor A3(2)]	0.41	1	1	1	1	9.14073e+07				2.41537	0.41	1	1	1690	179.013	5.96045
32141280	UDP-N-acetylglucosamine transferase [Streptomyces coelicolor A3(2)]	1.57	1	1	1	2	95810504				4.3112	1.57	1	2	509	56.4194	5.75732
21224779	oxidoreductase [Streptomyces coelicolor A3(2)]	1	1	1	1	1	34336102				0	1	1	1	601	62.8161	6.56592
21224924	protein kinase [Streptomyces coelicolor A3(2)]	0.39	1	1	1	2	2.98853e+07				1.86352	0.39	1	2	1557	169.101	6.39209
32141318	acetolactate synthase, partial [Streptomyces coelicolor A3(2)]	6.41	1	1	1	4	0				9.57434	6.41	2	4	624	66.317	6.22705
21225338	methyltransferase [Streptomyces coelicolor A3(2)]	2.9	1	1	1	1	60262044				2.11239	2.9	1	1	241	26.3698	10.1841
21225732	sensor histidine kinase [Streptomyces coelicolor A3(2)]	1.5	1	1	1	3	1.04284e+07				5.70797	1.5	2	3	400	42.5319	7.04932
21225791	chloramphenicol resistance protein [Streptomyces coelicolor A3(2)]	14.39	1	1	1	1	0				0	14.39	1	1	403	40.7002	9.62744
21225819	solute binding lipoprotein [Streptomyces coelicolor A3(2)]	7.34	1	1	1	2	1.23984e+06		0.440802		0	7.34	2	2	436	46.8065	5.18604
21225878	AbaA-like protein [Streptomyces coelicolor A3(2)]	8.99	1	1	1	3	3.95576e+07				6.16659	8.99	1	3	89	9.55271	7.1958
21226090	ATP/GTP-binding protein, partial [Streptomyces coelicolor A3(2)]	1.9	1	1	1	1	1.03993e+07				1.86073	1.9	1	1	368	38.8363	10.0962
21218738	hypothetical protein SCO0181 [Streptomyces coelicolor A3(2)]	1.83	1	1	1	3	4.91883e+07				5.87882	1.83	1	3	328	34.7271	6.354
21220309	hypothetical protein SCO1820 [Streptomyces coelicolor A3(2)]	5.03	1	1	1	2	0				1.78086	5.03	1	2	159	16.5285	10.6675
21220336	cobalamin biosynthesis protein [Streptomyces coelicolor A3(2)]	2.14	1	1	1	2	39370108				4.49891	2.14	1	2	327	33.1346	11.4438
21220600	hypothetical protein SCO2122 [Streptomyces coelicolor A3(2)]	2.67	1	1	1	2	1.80055e+07				4.77672	2.67	2	2	262	28.1528	9.62744
21220880	hypothetical protein SCO2414 [Streptomyces coelicolor A3(2)]	1.62	1	1	1	1	401670348				1.65499	1.62	1	1	433	44.044	4.95752
21221166	glycosyl transferase [Streptomyces coelicolor A3(2)]	1.75	1	1	1	2	30622050				4.37862	1.75	1	2	400	41.8894	9.12939
21221326	hypothetical protein SCO2877 [Streptomyces coelicolor A3(2)]	4.69	1	1	1	1	8.28931e+07				1.83188	4.69	1	1	128	14.0356	10.0962
21221845	ABC transporter ATP-binding protein [Streptomyces coelicolor A3(2)]	2.54	1	1	1	1	21299605				2.10956	2.54	1	1	315	33.2877	5.60498
21222341	plasmid replication initiator protein [Streptomyces coelicolor A3(2)]	1.55	1	1	1	1	7.84321e+06				2.13667	1.55	1	1	452	49.1278	8.90967
21223117	pantothenate kinase [Streptomyces coelicolor A3(2)]	1.82	1	1	1	1	0				2.13443	1.82	1	1	329	37.0929	9.65674
21225251	hypothetical protein SCO6964 [Streptomyces coelicolor A3(2)]	3.7	1	1	1	2	173838526				4.67241	3.7	1	2	216	23.7956	7.44482
21225491	hypothetical protein SCO7214 [Streptomyces coelicolor A3(2)]	1.69	1	1	1	1	54127932				2.19939	1.69	1	1	355	36.2606	9.84717
21225529	regulatory protein [Streptomyces coelicolor A3(2)]	1.2	1	1	1	2	17638449				1.65614	1.2	1	2	502	54.8209	7.51807
21218710	hypothetical protein SCO0153 [Streptomyces coelicolor A3(2)]	27.18	1	1	1	1	1.97692e+07				0	27.18	1	1	195	20.5944	6.1001
21219762	hypothetical protein SCO1253 [Streptomyces coelicolor A3(2)]	15	1	1	1	4	25171239				0	15	1	4	260	28.6577	6.88818
31340548	two-component system sensor kinase, partial [Streptomyces coelicolor A3(2)]	3.06	1	1	1	1	0				2.19988	3.06	1	1	392	41.8119	6.771
21222253	hypothetical protein SCO3844 [Streptomyces coelicolor A3(2)]	3.49	1	1	1	1	1.13852e+07				0	3.49	1	1	172	18.659	11.1509
21222952	NADH dehydrogenase subunit H [Streptomyces coelicolor A3(2)]	9.42	1	1	1	3	12122705				0	9.42	1	3	467	51.1264	5.98584
21223754	ABC transporter [Streptomyces coelicolor A3(2)]	3.88	1	1	1	2	1.52121e+07				4.10868	3.88	1	2	258	27.3155	9.74463
21223983	hypothetical protein SCO5628 [Streptomyces coelicolor A3(2)]	13.3	1	1	1	1	0				0	13.3	1	1	391	41.1734	5.2876
21224242	RNA methyltransferase [Streptomyces coelicolor A3(2)]	1.31	1	1	1	1	123219				0	1.31	1	1	458	49.4625	6.59521
21224996	3-oxoadipate CoA-transferase subunit B [Streptomyces coelicolor A3(2)]	25.35	1	1	1	1	770974				0	25.35	1	1	217	22.4796	4.79248
21225290	carbohydrate kinase [Streptomyces coelicolor A3(2)]	10.23	1	1	1	1	2.63119e+07				0	10.23	1	1	479	49.6178	5.33838
21225728	ABC transporter ATP-binding protein [Streptomyces coelicolor A3(2)]	12.9	1	1	1	1	0		0.413108		0	12.9	1	1	279	30.4722	9.05615
21225946	cytochrome P450 [Streptomyces coelicolor A3(2)]	11.92	1	1	1	1	2.44878e+07				0	11.92	1	1	411	45.0724	5.31299
21219155	membrane transport protein [Streptomyces coelicolor A3(2)]	1.3	1	1	1	1	0				0	1.3	1	1	539	55.64	9.14404
21220013	GTP pyrophosphokinase [Streptomyces coelicolor A3(2)]	4.6	1	1	1	3	2.32337e+07				0	4.6	1	3	847	94.1234	9.33447
21220302	integral membrane transporter [Streptomyces coelicolor A3(2)]	14.73	1	1	1	2	6.09302e+06				0	14.73	1	2	421	43.4643	10.2427
21220532	imidazole glycerol phosphate synthase subunit HisH [Streptomyces coelicolor A3(2)]	10.36	1	1	1	1	0				1.80964	10.36	1	1	222	23.8458	5.16064
21221005	adenosine deaminase [Streptomyces coelicolor A3(2)]	2.94	1	1	1	1	5.77019e+08				2.3673	2.94	1	1	340	37.5121	4.95752
21222522	two-component system response regulator [Streptomyces coelicolor A3(2)]	17.12	1	1	1	1	5.46233e+07				0	17.12	1	1	222	23.9485	5.8335
21223130	acetyltransferase [Streptomyces coelicolor A3(2)]	7.34	1	1	1	1	0				1.86414	7.34	1	1	177	19.8157	5.04639
21223672	hypothetical protein SCO5309 [Streptomyces coelicolor A3(2)]	9.59	1	1	1	1	0				0	9.59	1	1	365	38.9113	9.14404
21224163	sporulation transcription factor, WhiH [Streptomyces coelicolor A3(2)]	12.88	1	1	1	1	0			1.50415	0	12.88	1	1	295	31.8963	6.23975
21224920	ATP/GTP binding protein [Streptomyces coelicolor A3(2)]	1.43	1	1	1	1	6.33747e+06				1.86079	1.43	1	1	628	69.4684	6.84424
21225282	RNA polymerase sigma factor [Streptomyces coelicolor A3(2)]	17.8	1	1	1	1	64319.3				0	17.8	1	1	191	21.312	6.93213
21226064	TetR family transcriptional regulator [Streptomyces coelicolor A3(2)]	2.69	3	1	1	4	2.44081e+08				7.45594	2.69	1	4	223	24.3298	5.99854
